# Supplementary material for: Palladium catalyzed cascade umpolung allylation/acetalation for the construction of quaternary 3-amino oxindoles
Source: Royal Society of Chemistry journal article supplement (doi:10.1039/d1cc03075b), 2021-01-01

*Electronic Supplementary Information for*

## **Palladium Catalyzed Cascade Umpolung Allylation/Acetalation for the Construction of Quaternary 3-Amino Oxindoles**

Xi-Shang Sun,<sup>‡a</sup> Xin Chang,<sup>‡a</sup> Li-Min Shi,<sup>‡a</sup> Zuo-Fei Wang,<sup>a</sup> Liang Wei,<sup>\*a</sup> and Chun-Jiang Wang<sup>\*a,b</sup>

*E-mail:* [cjwang@whu.edu.cn](mailto:cjwang@whu.edu.cn)

### **Table of Contents**

|    |                                                                                                             |     |
|----|-------------------------------------------------------------------------------------------------------------|-----|
| 1. | General remarks.....                                                                                        | S2  |
| 2. | General procedure for Pd catalyzed allylic alkylation of <i>N</i> -2,2,2-trifluoroethylisatin ketamine..... | S2  |
| 3. | Synthetic applications.....                                                                                 | S21 |
| 4. | Proposed mechanism for cascade umpolung allylation/acetalation.....                                         | S22 |
| 5. | References.....                                                                                             | S23 |
| 6. | NMR spectra.....                                                                                            | S24 |

## 1. General remarks

<sup>1</sup>H NMR spectra were recorded on a Bruker 400 MHz spectrometer in CDCl<sub>3</sub>. Chemical shifts are reported in ppm with the internal TMS signal at 0.0 ppm as a standard. The data are reported as (s = single, d = double, t = triple, q = quarte, m = multiple or unresolved, brs = broad single, coupling constant(s) in Hz, integration). <sup>13</sup>C NMR spectra were recorded on a Bruker 100 MHz spectrometer in CDCl<sub>3</sub>. <sup>19</sup>F NMR spectra were recorded on a Bruker 376 MHz spectrometer in CDCl<sub>3</sub>. Chemical shifts are reported in ppm. Commercially obtained reagents were used without further purification. All reactions were monitored by TLC with silica gel-coated plates.

## 2. General procedure for Pd catalyzed allylic alkylation of *N*-2,2,2-trifluoroethylisatin ketamine

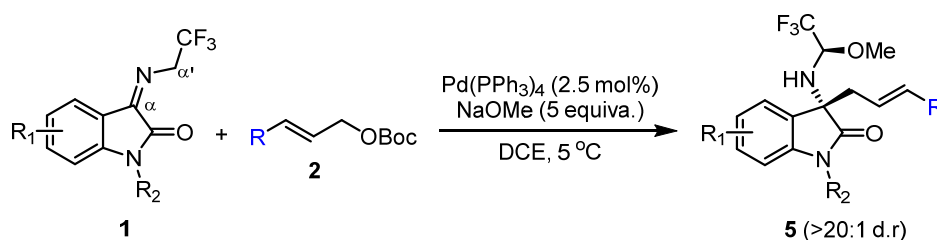

In a 25 mL nitrogen-filled dry Schlenk tube, Pd(PPh<sub>3</sub>)<sub>4</sub> (6.0 mg, 0.005 mmol), *N*-2,2,2-trifluoroethylisatin ketamine **1** (0.2 mmol), *tert*-butyl cinnamyl carbonates **2** (0.22 mmol) and degassed DCE (2 mL) were added. Once the temperature was reduced to 5 °C, Sodium methoxide (1.0 mmol) was added in one portion under N<sub>2</sub> atmosphere. The reaction was stirred for 12 h at 5 °C until starting material was consumed (monitored by TLC). The reaction mixture was concentrated via rotary evaporation under reduced pressure, and then purified by flash chromatography on silica gel (PE/EA = 10:1) to give the allylation products **5**.

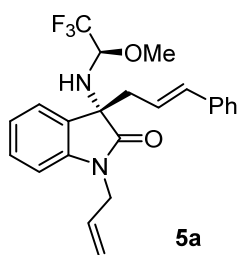

**1-allyl-3-cinnamyl-3-((2,2,2-trifluoro-1-methoxyethyl)amino)indolin-2-one:**

Yellow solid; 77% yield.  $^1\text{H}$  NMR (400 MHz,  $\text{CDCl}_3$ )  $\delta$  7.44 – 7.29 (m, 2H), 7.29 – 7.04 (m, 6H), 6.85 (d,  $J = 7.7$  Hz, 1H), 6.31 (d,  $J = 15.8$  Hz, 1H), 6.00 – 5.83 (m, 1H), 5.81 – 5.61 (m, 1H), 5.13 (dd,  $J = 49.4, 13.7$  Hz, 2H), 4.43 (dd,  $J = 16.1, 5.3$  Hz, 1H), 4.17 (dd,  $J = 16.1, 5.6$  Hz, 1H), 4.07 – 3.83 (m, 1H), 3.13 (d,  $J = 12.7$  Hz, 1H), 2.93 (s, 3H), 2.82 (dd,  $J = 13.2, 6.1$  Hz, 1H), 2.63 (dd,  $J = 13.2, 8.8$  Hz, 1H).  $^{13}\text{C}$  NMR (101 MHz,  $\text{CDCl}_3$ )  $\delta$  178.9, 143.5, 136.9, 135.0, 131.3, 129.7, 128.4, 127.4, 126.3, 126.2, 124.9, 123.3 (q,  $J = 285.9$  Hz), 122.7, 122.0, 118.1, 109.4, 85.0 (q,  $J = 31.8$  Hz), 63.3, 56.9, 56.8, 42.5.  $^{19}\text{F}$  NMR (376 MHz,  $\text{CDCl}_3$ )  $\delta$  -78.90 (d,  $J = 4.4$  Hz). HRMS Calcd. For  $\text{C}_{23}\text{H}_{23}\text{F}_3\text{N}_2\text{O}_2\text{Na}$  ( $[\text{M}+\text{Na}]^+$ ): 439.1604, found: 439.1592.

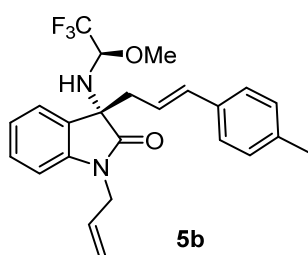

**(E)-1-allyl-3-(3-(p-tolyl)allyl)-3-((2,2,2-trifluoro-1-methoxyethyl)amino)indolin-2-one:**

Yellow solid; 77% yield.  $^1\text{H}$  NMR (400 MHz,  $\text{CDCl}_3$ )  $\delta$  7.40 – 7.28 (m, 2H), 7.20 – 6.96 (m, 5H), 6.85 (d,  $J = 7.7$  Hz, 1H), 6.27 (d,  $J = 15.8$  Hz, 1H), 5.92 – 5.79 (m, 1H), 5.79 – 5.62 (m, 1H), 5.29 – 4.99 (m, 2H), 4.42 (ddt,  $J = 16.1, 5.4, 1.5$  Hz, 1H), 4.17 (ddt,  $J = 16.1, 5.6, 1.3$  Hz, 1H), 3.96 (dq,  $J = 12.7, 4.8$  Hz, 1H), 3.12 (d,  $J = 12.7$  Hz, 1H), 2.93 (s, 3H), 2.80 (ddd,  $J = 13.2, 6.2, 1.3$  Hz, 1H), 2.61 (dd,  $J = 13.6, 8.8$  Hz, 1H), 2.29 (s, 3H).  $^{13}\text{C}$  NMR (101 MHz,  $\text{CDCl}_3$ )  $\delta$  179.0, 143.5, 137.2, 134.8, 134.2, 131.4, 129.7, 129.1, 126.4, 126.1, 124.9, 123.3 (q,  $J = 285.8$  Hz), 122.7, 120.9, 118.1, 109.3, 85.0 (q,  $J = 31.8$  Hz), 63.4, 56.8, 42.5, 42.5, 21.2.  $^{19}\text{F}$  NMR (376 MHz,  $\text{CDCl}_3$ )  $\delta$  -78.90 (d,  $J = 4.6$  Hz). HRMS Calcd. For  $\text{C}_{24}\text{H}_{25}\text{F}_3\text{N}_2\text{O}_2\text{Na}$  ( $[\text{M}+\text{Na}]^+$ ): 453.1760, found: 453.1758.

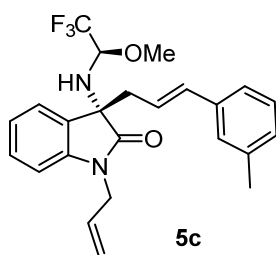

**(E)-1-allyl-3-(3-(m-tolyl)allyl)-3-((2,2,2-trifluoro-1-methoxyethyl)amino)indolin-2-one:**

Yellow solid; 73% yield.  $^1\text{H}$  NMR (400 MHz,  $\text{CDCl}_3$ )  $\delta$  7.32 (t,  $J = 8.2$  Hz, 2H), 7.12 (t,  $J = 6.0$  Hz, 2H), 7.00 (s, 3H), 6.85 (d,  $J = 7.6$  Hz, 1H), 6.28 (d,  $J = 15.8$  Hz, 1H), 5.90 (dt,  $J = 15.3, 7.5$  Hz, 1H), 5.82 – 5.61 (m, 1H), 5.15 (dd,  $J = 46.5, 13.7$  Hz, 2H), 4.43 (dd,  $J = 15.9, 4.5$  Hz, 1H), 4.18 (dd,  $J = 16.1, 5.0$  Hz, 1H), 4.05 – 3.85 (m, 1H), 3.13 (d,  $J = 12.6$  Hz, 1H), 2.93 (s, 3H), 2.80 (dd,  $J = 13.0, 6.0$  Hz, 1H), 2.62 (dd,  $J = 12.8, 9.0$  Hz, 1H), 2.29 (s, 3H).  $^{13}\text{C}$  NMR (101 MHz,  $\text{CDCl}_3$ )  $\delta$  177.94, 142.40, 136.92, 135.85, 134.02, 130.32, 128.68, 127.27, 127.15, 125.98, 125.32, 123.86, 122.30, 122.27 (q,  $J = 286.0$  Hz), 121.67, 120.73, 117.00, 108.32, 83.98 (q,  $J = 31.8$  Hz), 62.27, 55.80, 41.45, 41.42, 20.29.  $^{19}\text{F}$  NMR (376 MHz,  $\text{CDCl}_3$ )  $\delta$  -78.90 (d,  $J = 4.3$  Hz). HRMS Calcd. For  $\text{C}_{24}\text{H}_{25}\text{F}_3\text{N}_2\text{O}_2\text{Na}$  ( $[\text{M}+\text{Na}]^+$ ): 453.1760, found: 453.1759.

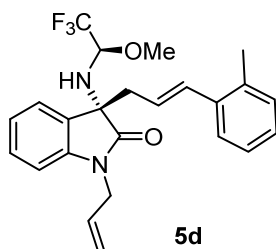

**(E)-1-allyl-3-(3-(o-tolyl)allyl)-3-((2,2,2-trifluoro-1-methoxyethyl)amino)indolin-2-one:**

Yellow solid; 61% yield.  $^1\text{H}$  NMR (400 MHz,  $\text{CDCl}_3$ )  $\delta$  7.42 – 7.29 (m, 2H), 7.22 – 7.01 (m, 5H), 6.86 (d,  $J = 7.8$  Hz, 1H), 6.49 (d,  $J = 15.7$  Hz, 1H), 5.85 – 5.61 (m, 2H), 5.28 – 5.00 (m, 2H), 4.39 (ddt,  $J = 16.0, 5.5, 1.5$  Hz, 1H), 4.20 (ddt,  $J = 16.1, 5.6, 1.4$  Hz, 1H), 3.97 (dq,  $J = 12.7, 4.8$  Hz, 1H), 3.13 (d,  $J = 12.7$  Hz, 1H), 2.94 (s, 3H), 2.82 (ddd,  $J = 13.1, 6.6, 1.3$  Hz, 1H), 2.65 (ddd,  $J = 13.2, 8.5, 0.5$  Hz, 1H), 2.14 (s, 3H).  $^{13}\text{C}$  NMR (101 MHz,  $\text{CDCl}_3$ )  $\delta$  178.9, 143.5, 136.2, 135.3, 133.3, 131.3, 130.0, 129.7, 127.3, 126.4, 125.9, 125.7, 124.9, 123.4, 123.3 (q,  $J = 285.9$  Hz), 122.7, 118.1, 109.4, 85.0 (q,  $J = 31.8$  Hz), 63.4, 56.7, 42.7, 42.5, 19.6.  $^{19}\text{F}$  NMR (376 MHz,  $\text{CDCl}_3$ )  $\delta$  -78.86 (d,  $J = 4.8$  Hz). HRMS Calcd. For  $\text{C}_{24}\text{H}_{25}\text{F}_3\text{N}_2\text{O}_2\text{Na}$  ( $[\text{M}+\text{Na}]^+$ ): 453.1760, found: 453.1752.

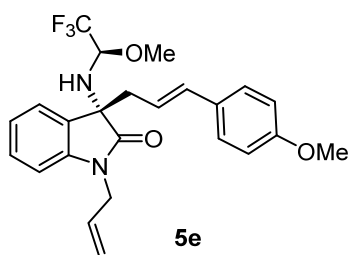

**(E)-1-allyl-3-(3-(4-methoxyphenyl)allyl)-3-((2,2,2-trifluoro-1-methoxyethyl)amino)indolin-2-one:**

Yellow solid; 77% yield.  $^1\text{H}$  NMR (400 MHz,  $\text{CDCl}_3$ )  $\delta$  7.39 – 7.28 (m, 2H), 7.18 – 7.06 (m, 3H), 6.85 (d,  $J = 7.7$  Hz, 1H), 6.82 – 6.72 (m, 2H), 6.25 (d,  $J = 15.8$  Hz, 1H), 5.83 – 5.64 (m, 2H), 5.25 – 5.01 (m, 2H), 4.43 (ddt,  $J = 16.1, 5.3, 1.5$  Hz, 1H), 4.23 – 4.07 (m, 1H), 3.96 (dq,  $J = 12.7, 4.8$  Hz, 1H), 3.77 (s, 3H), 3.12 (d,  $J = 12.7$  Hz, 1H), 2.93 (s, 3H), 2.79 (ddd,  $J = 13.2, 6.2, 1.3$  Hz, 1H), 2.61 (dd,  $J = 13.4, 8.9$  Hz, 1H).  $^{13}\text{C}$  NMR (101 MHz,  $\text{CDCl}_3$ )  $\delta$  179.0, 159.1, 143.5, 134.3, 131.3, 129.8, 129.7, 127.4, 126.4, 124.9, 123.3 (q,  $J = 285.8$  Hz), 122.7, 119.7, 118.0, 113.8, 109.3, 85.0 (q,  $J = 31.8$  Hz), 63.4, 56.8, 55.3, 42.5, 42.4.  $^{19}\text{F}$  NMR (376 MHz,  $\text{CDCl}_3$ )  $\delta$  -78.91 (d,  $J = 4.6$  Hz). HRMS Calcd. For  $\text{C}_{24}\text{H}_{25}\text{F}_3\text{N}_2\text{O}_3\text{Na}$  ( $[\text{M}+\text{Na}]^+$ ): 469.1709, found: 469.1706.

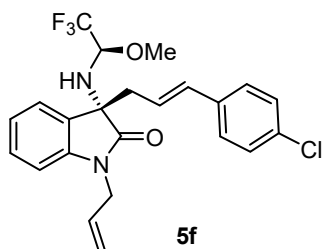

**(E)-1-allyl-3-(3-(4-chlorophenyl)allyl)-3-((2,2,2-trifluoro-1-methoxyethyl)amino)indolin-2-one:**

Yellow solid; 54% yield.  $^1\text{H}$  NMR (400 MHz,  $\text{CDCl}_3$ )  $\delta$  7.37 – 7.30 (m, 2H), 7.20 (d,  $J = 8.5$  Hz, 2H), 7.16 – 7.06 (m, 3H), 6.86 (d,  $J = 7.9$  Hz, 1H), 6.26 (d,  $J = 15.9$  Hz, 1H), 5.94 – 5.80 (m, 1H), 5.78 – 5.62 (m, 1H), 5.26 – 5.01 (m, 2H), 4.52 – 4.37 (m, 1H), 4.22 – 4.10 (m, 1H), 3.95 (dq,  $J = 12.7, 4.8$  Hz, 1H), 3.12 (d,  $J = 12.7$  Hz, 1H), 2.93 (s, 3H), 2.80 (ddd,  $J = 13.2, 6.2, 1.2$  Hz, 1H), 2.63 (dd,  $J = 13.3, 8.9$  Hz, 1H).  $^{13}\text{C}$  NMR (101 MHz,  $\text{CDCl}_3$ )  $\delta$  178.84, 143.43, 135.38, 133.73, 133.04, 131.26, 129.82, 128.58, 127.40, 126.20, 124.83, 123.28 (q,  $J = 285.9$  Hz), 122.79, 122.75, 118.07, 109.40, 85.00 (q,  $J = 31.8$  Hz), 63.28, 56.90, 42.44, 42.37.  $^{19}\text{F}$  NMR (376 MHz,  $\text{CDCl}_3$ )  $\delta$  -78.93 (d,  $J = 4.5$  Hz). HRMS Calcd. For  $\text{C}_{23}\text{H}_{22}\text{ClF}_3\text{N}_2\text{O}_2\text{Na}$

([M+Na]<sup>+</sup>): 473.1214, found: 473.1205.

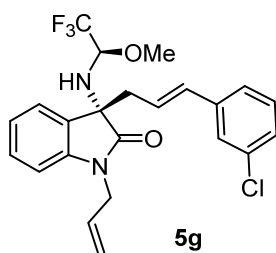

**(E)-1-allyl-3-(3-(3-chlorophenyl)allyl)-3-((2,2,2-trifluoro-1-methoxyethyl)amino)indolin-2-one:**

Yellow solid; 60% yield. <sup>1</sup>H NMR (400 MHz, CDCl<sub>3</sub>) δ 7.40 – 7.31 (m, 2H), 7.22 – 7.10 (m, 4H), 7.08 – 7.01 (m, 1H), 6.87 (d, *J* = 7.7 Hz, 1H), 6.25 (d, *J* = 15.8 Hz, 1H), 5.99 – 5.83 (m, 1H), 5.80 – 5.66 (m, 1H), 5.31 – 5.04 (m, 2H), 4.53 – 4.38 (m, 1H), 4.23 – 4.12 (m, 1H), 3.95 (dq, *J* = 12.7, 4.8 Hz, 1H), 3.12 (d, *J* = 12.7 Hz, 1H), 2.93 (s, 3H), 2.81 (ddd, *J* = 13.2, 6.3, 1.2 Hz, 1H), 2.63 (dd, *J* = 13.2, 8.8 Hz, 1H). <sup>13</sup>C NMR (101 MHz, CDCl<sub>3</sub>) δ 178.82, 143.41, 138.75, 134.38, 133.66, 131.25, 129.87, 129.66, 127.37, 126.13, 126.10, 124.84, 124.46, 123.73, 123.28 (q, *J* = 285.9 Hz), 122.79, 118.14, 109.42, 85.01 (q, *J* = 31.7 Hz), 63.25, 56.90, 42.46, 42.35. <sup>19</sup>F NMR (376 MHz, CDCl<sub>3</sub>) δ -78.92 (d, *J* = 4.5 Hz). HRMS Calcd. For C<sub>23</sub>H<sub>22</sub>ClF<sub>3</sub>N<sub>2</sub>O<sub>2</sub>Na ([M+Na]<sup>+</sup>): 473.1214, found: 473.1209.

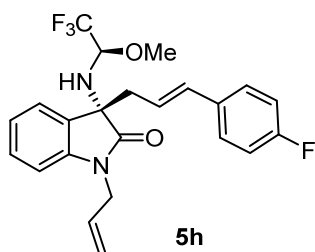

**(E)-1-allyl-3-(3-(4-fluorophenyl)allyl)-3-((2,2,2-trifluoro-1-methoxyethyl)amino)indolin-2-one:**

Yellow solid; 79% yield. <sup>1</sup>H NMR (400 MHz, CDCl<sub>3</sub>) δ 7.33 (t, *J* = 6.2 Hz, 2H), 7.13 (t, *J* = 6.6 Hz, 3H), 7.03 – 6.76 (m, 3H), 6.28 (d, *J* = 15.8 Hz, 1H), 5.90 – 5.61 (m, 2H), 5.12 (dd, *J* = 45.8, 13.7 Hz, 2H), 4.44 (dd, *J* = 16.1, 5.0 Hz, 1H), 4.16 (dd, *J* = 16.0, 5.3 Hz, 1H), 4.05 – 3.86 (m, 1H), 3.12 (d, *J* = 12.6 Hz, 1H), 2.93 (s, 3H), 2.80 (dd, *J* = 13.1, 5.9 Hz, 1H), 2.62 (dd, *J* = 13.1, 8.9 Hz, 1H). <sup>13</sup>C NMR (101 MHz, CDCl<sub>3</sub>) δ 178.90, 162.19 (d, *J* = 247.7 Hz), 143.44, 133.76,

133.08 (d,  $J = 3.3$  Hz), 131.28, 129.78, 127.68 (d,  $J = 8.0$  Hz), 126.28, 124.84, 123.30 (q,  $J = 286.1$  Hz), 122.73, 121.75 (d,  $J = 2.1$  Hz), 118.02, 115.31 (d,  $J = 21.7$  Hz), 109.37, 85.01 (q,  $J = 31.8$  Hz), 63.31, 56.88, 42.43, 42.36.  $^{19}\text{F}$  NMR (376 MHz,  $\text{CDCl}_3$ )  $\delta$  -78.93 (d,  $J = 4.5$  Hz), -113.92 – -114.81 (m). HRMS Calcd. For  $\text{C}_{23}\text{H}_{22}\text{F}_4\text{N}_2\text{O}_2\text{Na}$  ( $[\text{M}+\text{Na}]^+$ ): 457.1510, found: 457.1502.

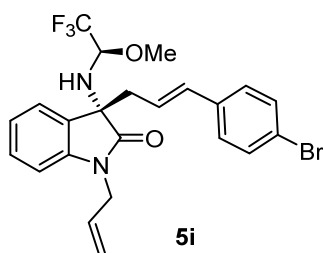

**(E)-1-allyl-3-(3-(4-bromophenyl)allyl)-3-((2,2,2-trifluoro-1-methoxyethyl)amino)indolin-2-one:**

Yellow solid; 64% yield.  $^1\text{H}$  NMR (400 MHz,  $\text{CDCl}_3$ )  $\delta$  7.41 – 7.30 (m, 4H), 7.19 – 7.08 (m, 1H), 7.03 (d,  $J = 8.5$  Hz, 2H), 6.93 – 6.76 (m, 1H), 6.25 (d,  $J = 15.9$  Hz, 1H), 5.95 – 5.82 (m, 1H), 5.77 – 5.60 (m, 1H), 5.26 – 5.03 (m, 2H), 4.43 (ddt,  $J = 16.1, 5.4, 1.5$  Hz, 1H), 4.24 – 4.10 (m, 1H), 3.95 (dq,  $J = 12.7, 4.8$  Hz, 1H), 3.12 (d,  $J = 12.7$  Hz, 1H), 2.93 (s, 3H), 2.80 (ddd,  $J = 13.2, 6.2, 1.4$  Hz, 1H), 2.62 (dd,  $J = 13.5, 9.0$  Hz, 1H).  $^{13}\text{C}$  NMR (101 MHz,  $\text{CDCl}_3$ )  $\delta$  178.83, 143.41, 135.81, 133.78, 131.53, 131.25, 129.82, 127.72, 126.18, 124.83, 123.27 (q,  $J = 281.4$  Hz), 122.94, 122.75, 121.18, 118.08, 109.39, 84.99 (q,  $J = 31.8$  Hz), 63.25, 56.89, 42.44, 42.37.  $^{19}\text{F}$  NMR (376 MHz,  $\text{CDCl}_3$ )  $\delta$  -78.93 (d,  $J = 4.8$  Hz). HRMS Calcd. For  $\text{C}_{23}\text{H}_{23}\text{BrF}_3\text{N}_2\text{O}_2$  ( $[\text{M}+\text{H}]^+$ ): 495.0890, found: 495.0890.

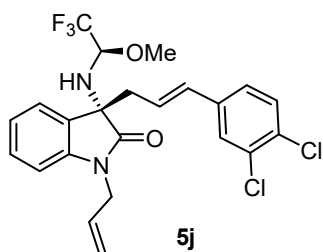

**(E)-1-allyl-3-(3-(3,4-dichlorophenyl)allyl)-3-((2,2,2-trifluoro-1-methoxyethyl)amino)indolin-2-one:**

Yellow solid; 79% yield.  $^1\text{H}$  NMR (400 MHz,  $\text{CDCl}_3$ )  $\delta$  7.38 – 7.27 (m, 3H), 7.24 (d,  $J = 2.0$

Hz, 1H), 7.14 (td,  $J = 7.6, 0.8$  Hz, 1H), 7.00 (dd,  $J = 8.3, 2.0$  Hz, 1H), 6.87 (d,  $J = 7.8$  Hz, 1H), 6.21 (d,  $J = 15.9$  Hz, 1H), 5.98 – 5.81 (m, 1H), 5.81 – 5.61 (m, 1H), 5.29 – 5.03 (m, 2H), 4.44 (ddt,  $J = 16.0, 5.4, 1.5$  Hz, 1H), 4.16 (ddt,  $J = 16.1, 5.6, 1.3$  Hz, 1H), 3.95 (dq,  $J = 12.7, 4.8$  Hz, 1H), 3.12 (d,  $J = 12.7$  Hz, 1H), 2.93 (s, 3H), 2.80 (ddd,  $J = 13.2, 6.3, 1.3$  Hz, 1H), 2.63 (dd,  $J = 13.5, 8.9$  Hz, 1H).  $^{13}\text{C}$  NMR (101 MHz,  $\text{CDCl}_3$ )  $\delta$  178.8, 143.4, 137.0, 132.7, 132.6, 131.2, 131.1, 130.4, 129.9, 127.9, 126.1, 125.4, 124.8, 124.3, 123.3 (q,  $J = 285.8$  Hz), 122.8, 118.2, 109.5, 85.0 (q,  $J = 31.8$  Hz), 63.2, 56.9, 42.5, 42.3.  $^{19}\text{F}$  NMR (376 MHz,  $\text{CDCl}_3$ )  $\delta$  -78.93 (d,  $J = 4.4$  Hz). HRMS Calcd. For  $\text{C}_{23}\text{H}_{21}\text{Cl}_2\text{F}_3\text{N}_2\text{O}_2\text{Na}$  ( $[\text{M}+\text{Na}]^+$ ): 507.0824, found: 507.0818.

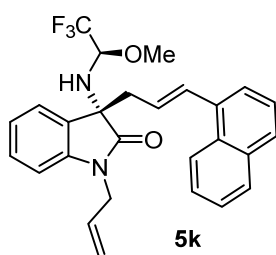

**(*E*)-1-allyl-3-(3-(naphthalen-1-yl)allyl)-3-((2,2,2-trifluoro-1-methoxyethyl)amino)indolin-2-one:**

Yellow solid; 73% yield.  $^1\text{H}$  NMR (400 MHz,  $\text{CDCl}_3$ )  $\delta$  7.85 – 7.67 (m, 3H), 7.49 – 7.27 (m, 6H), 7.19 – 7.11 (m, 1H), 7.00 (d,  $J = 15.6$  Hz, 1H), 6.84 (d,  $J = 7.8$  Hz, 1H), 5.88 (ddd,  $J = 15.3, 8.4, 6.7$  Hz, 1H), 5.78 – 5.55 (m, 1H), 5.25 – 4.90 (m, 2H), 4.42 – 4.29 (m, 1H), 4.26 – 4.16 (m, 1H), 4.00 (dq,  $J = 12.7, 4.8$  Hz, 1H), 3.20 (d,  $J = 12.7$  Hz, 1H), 3.01 – 2.88 (m, 4H), 2.76 (dd,  $J = 13.0, 8.6$  Hz, 1H).  $^{13}\text{C}$  NMR (101 MHz,  $\text{CDCl}_3$ )  $\delta$  179.0, 143.6, 135.0, 133.4, 132.9, 131.3, 131.0, 129.8, 128.3, 127.8, 126.4, 125.9, 125.7, 125.5, 125.4, 125.0, 124.0, 123.9, 123.3 (q,  $J = 286.1$  Hz), 122.8, 118.2, 109.5, 85.0 (q,  $J = 31.7$  Hz), 63.5, 56.8, 42.7, 42.5.  $^{19}\text{F}$  NMR (376 MHz,  $\text{CDCl}_3$ )  $\delta$  -78.80 (d,  $J = 4.5$  Hz). HRMS Calcd. For  $\text{C}_{27}\text{H}_{25}\text{F}_3\text{N}_2\text{O}_2\text{Na}$  ( $[\text{M}+\text{Na}]^+$ ): 489.1760, found: 489.1757.



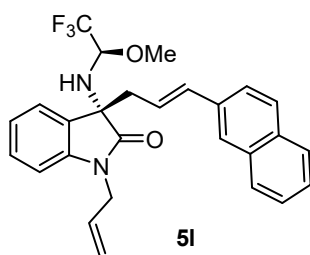

**(E)-1-allyl-3-(3-(naphthalen-2-yl)allyl)-3-((2,2,2-trifluoro-1-methoxyethyl)amino)indolin-2-one:**

Yellow solid; 55% yield.  $^1\text{H}$  NMR (400 MHz,  $\text{CDCl}_3$ )  $\delta$  7.83 – 7.64 (m, 3H), 7.54 (s, 1H), 7.48 – 7.28 (m, 5H), 7.18 – 7.08 (m, 1H), 6.85 (d,  $J = 7.8$  Hz, 1H), 6.47 (d,  $J = 15.8$  Hz, 1H), 6.10 – 5.91 (m, 1H), 5.80 – 5.62 (m, 1H), 5.27 – 4.94 (m, 2H), 4.54 – 4.32 (m, 1H), 4.23 – 4.12 (m, 1H), 3.98 (dq,  $J = 12.7, 4.8$  Hz, 1H), 3.16 (d,  $J = 12.7$  Hz, 1H), 2.94 (s, 3H), 2.87 (ddd,  $J = 13.2, 6.2, 1.2$  Hz, 1H), 2.69 (dd,  $J = 13.3, 8.8$  Hz, 1H).  $^{13}\text{C}$  NMR (101 MHz,  $\text{CDCl}_3$ )  $\delta$  179.0, 143.5, 135.1, 134.4, 133.5, 132.9, 131.3, 129.8, 128.0, 127.9, 127.6, 126.3, 126.2, 126.1, 125.8, 124.9, 123.4, 123.3 (q,  $J = 31.7$  Hz), 122.8, 122.4, 118.1, 109.4, 85.1 (q,  $J = 31.7$  Hz), 63.4, 56.9, 42.6, 42.5.  $^{19}\text{F}$  NMR (376 MHz,  $\text{CDCl}_3$ )  $\delta$  -78.88 (d,  $J = 4.8$  Hz). HRMS Calcd. For  $\text{C}_{27}\text{H}_{25}\text{F}_3\text{N}_2\text{O}_2\text{Na}$  ( $[\text{M}+\text{Na}]^+$ ): 489.1760, found: 489.1757.

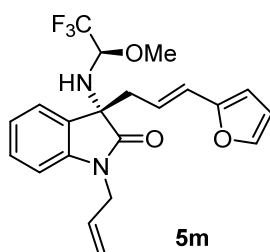

**(E)-1-allyl-3-(3-(furan-2-yl)allyl)-3-((2,2,2-trifluoro-1-methoxyethyl)amino)indolin-2-one:**

Yellow solid; 75% yield.  $^1\text{H}$  NMR (400 MHz,  $\text{CDCl}_3$ )  $\delta$  7.38 – 7.29 (m, 2H), 7.24 (d,  $J = 1.2$  Hz, 1H), 7.17 – 7.08 (m, 1H), 6.86 (d,  $J = 7.7$  Hz, 1H), 6.29 (dd,  $J = 3.2, 1.8$  Hz, 1H), 6.10 (dd,  $J = 21.3, 9.5$  Hz, 2H), 5.90 – 5.64 (m, 2H), 5.30 – 5.00 (m, 2H), 4.47 (ddt,  $J = 16.2, 5.1, 1.5$  Hz, 1H), 4.22 – 4.07 (m, 1H), 3.95 (dq,  $J = 12.7, 4.8$  Hz, 1H), 3.10 (d,  $J = 12.7$  Hz, 1H), 2.92 (s, 3H), 2.80 (ddd,  $J = 13.3, 6.3, 1.2$  Hz, 1H), 2.59 (dd,  $J = 13.3, 9.0$  Hz, 1H).  $^{13}\text{C}$  NMR (101 MHz,  $\text{CDCl}_3$ )  $\delta$  178.9, 152.4, 143.5, 141.7, 131.2, 129.8, 126.2, 124.8, 123.3 (q,  $J = 286.0$  Hz), 123.2, 122.7, 120.7, 117.8, 111.1, 109.4, 107.5, 85.0 (q,  $J = 31.7$  Hz), 63.3, 56.9, 42.4, 42.3.  $^{19}\text{F}$  NMR (376 MHz,  $\text{CDCl}_3$ )  $\delta$  -78.93 (d,  $J = 4.4$  Hz). HRMS Calcd. For  $\text{C}_{21}\text{H}_{21}\text{F}_3\text{N}_2\text{O}_3\text{Na}$  ( $[\text{M}+\text{Na}]^+$ ):

429.1396, found: 429.1396.

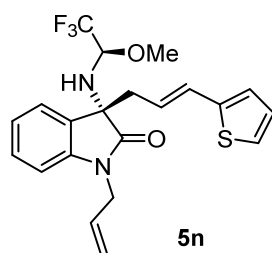

**(E)-1-allyl-3-(3-(thiophen-2-yl)allyl)-3-((2,2,2-trifluoro-1-methoxyethyl)amino)indolin-2-one:**

Yellow solid; 50% yield.  $^1\text{H}$  NMR (400 MHz,  $\text{CDCl}_3$ )  $\delta$  7.39 – 7.30 (m, 2H), 7.18 – 7.10 (m, 1H), 7.06 (d,  $J = 5.1$  Hz, 1H), 6.94 – 6.83 (m, 2H), 6.78 (d,  $J = 3.4$  Hz, 1H), 6.42 (d,  $J = 15.7$  Hz, 1H), 5.82 – 5.60 (m, 2H), 5.29 – 5.02 (m, 2H), 4.45 (ddt,  $J = 16.1, 5.3, 1.5$  Hz, 1H), 4.24 – 4.10 (m, 1H), 3.95 (dq,  $J = 12.7, 4.8$  Hz, 1H), 3.10 (d,  $J = 12.7$  Hz, 1H), 2.93 (s, 3H), 2.78 (ddd,  $J = 13.3, 6.4, 1.2$  Hz, 1H), 2.59 (dd,  $J = 13.3, 8.8$  Hz, 1H).  $^{13}\text{C}$  NMR (101 MHz,  $\text{CDCl}_3$ )  $\delta$  178.9, 143.5, 142.0, 131.3, 129.8, 128.0, 127.2, 126.1, 125.3, 124.9, 123.9, 123.3 (q,  $J = 285.8$  Hz), 122.8, 121.7, 118.1, 109.4, 85.0 (q,  $J = 31.8$  Hz), 63.3, 56.9, 42.5, 42.3.  $^{19}\text{F}$  NMR (376 MHz,  $\text{CDCl}_3$ )  $\delta$  -78.93 (d,  $J = 4.7$  Hz). HRMS Calcd. For  $\text{C}_{21}\text{H}_{21}\text{F}_3\text{N}_2\text{O}_2\text{SNa}$  ( $[\text{M}+\text{Na}]^+$ ): 445.1168, found: 445.1164.

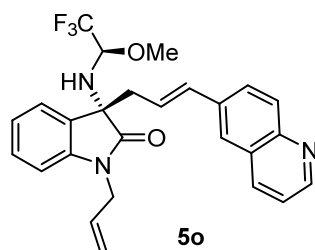

**(E)-1-allyl-3-(3-(quinolin-6-yl)allyl)-3-((2,2,2-trifluoro-1-methoxyethyl)amino)indolin-2-one:**

Yellow solid; 78% yield.  $^1\text{H}$  NMR (400 MHz,  $\text{CDCl}_3$ )  $\delta$  8.83 (dd,  $J = 4.1, 1.4$  Hz, 1H), 8.07 (d,  $J = 8.2$  Hz, 1H), 7.96 (d,  $J = 8.8$  Hz, 1H), 7.60 (dd,  $J = 8.8, 1.9$  Hz, 1H), 7.53 (d,  $J = 1.5$  Hz, 1H), 7.42 – 7.32 (m, 3H), 7.21 – 7.10 (m, 1H), 6.87 (d,  $J = 7.8$  Hz, 1H), 6.50 (d,  $J = 15.8$  Hz, 1H), 6.15 – 5.99 (m, 1H), 5.79 – 5.62 (m, 1H), 5.27 – 4.98 (m, 2H), 4.51 – 4.39 (m, 1H), 4.21 – 4.13 (m, 1H), 3.98 (dq,  $J = 12.7, 4.8$  Hz, 1H), 3.17 (d,  $J = 12.7$  Hz, 1H), 3.05 – 2.85 (m, 4H),

2.71 (dd,  $J = 13.3, 8.9$  Hz, 1H).  $^{13}\text{C}$  NMR (101 MHz,  $\text{CDCl}_3$ )  $\delta$  178.89, 150.03, 147.84, 143.45, 136.04, 135.09, 134.26, 131.23, 129.87, 129.43, 128.38, 127.11, 126.19, 125.58, 124.85, 123.81, 123.29 (q,  $J = 286.2$  Hz), 122.81, 121.44, 118.09, 109.45, 85.03 (q,  $J = 31.8$  Hz), 63.35, 56.92, 42.53, 42.45.  $^{19}\text{F}$  NMR (376 MHz,  $\text{CDCl}_3$ )  $\delta$  -78.91 (d,  $J = 4.4$  Hz). HRMS Calcd. For  $\text{C}_{26}\text{H}_{24}\text{F}_3\text{N}_3\text{O}_2\text{Na}$  ( $[\text{M}+\text{Na}]^+$ ): 490.1713, found: 490.1708.

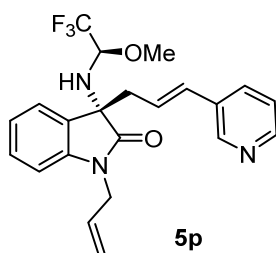

**(E)-1-allyl-3-(3-(pyridin-3-yl)allyl)-3-((2,2,2-trifluoro-1-methoxyethyl)amino)indolin-2-one:**

Yellow solid; 83% yield.  $^1\text{H}$  NMR (400 MHz,  $\text{CDCl}_3$ )  $\delta$  8.51 – 8.26 (m, 2H), 7.50 (dt,  $J = 7.9, 1.7$  Hz, 1H), 7.40 – 7.30 (m, 2H), 7.22 – 7.08 (m, 2H), 6.91 – 6.82 (m, 1H), 6.30 (d,  $J = 16.0$  Hz, 1H), 6.04 – 5.90 (m, 1H), 5.79 – 5.63 (m, 1H), 5.26 – 5.04 (m, 2H), 4.43 (ddt,  $J = 16.0, 5.5, 1.5$  Hz, 1H), 4.18 (ddt,  $J = 16.0, 5.5, 1.3$  Hz, 1H), 3.96 (dq,  $J = 12.7, 4.8$  Hz, 1H), 3.14 (d,  $J = 12.7$  Hz, 1H), 2.93 (s, 3H), 2.84 (ddd,  $J = 13.3, 6.2, 1.4$  Hz, 1H), 2.66 (dd,  $J = 13.7, 8.7$  Hz, 1H).  $^{13}\text{C}$  NMR (101 MHz,  $\text{CDCl}_3$ )  $\delta$  178.79, 148.40, 147.93, 143.39, 132.83, 132.53, 131.37, 131.23, 129.93, 126.04, 124.84, 124.79, 123.40, 123.26 (q,  $J = 285.9$  Hz), 122.83, 118.16, 109.45, 85.00 (q,  $J = 31.9$  Hz), 63.22, 56.92, 42.47, 42.41.  $^{19}\text{F}$  NMR (376 MHz,  $\text{CDCl}_3$ )  $\delta$  -78.94 (d,  $J = 4.5$  Hz). HRMS Calcd. For  $\text{C}_{22}\text{H}_{22}\text{F}_3\text{N}_3\text{O}_2\text{Na}$  ( $[\text{M}+\text{Na}]^+$ ): 440.1556, found: 440.1553.

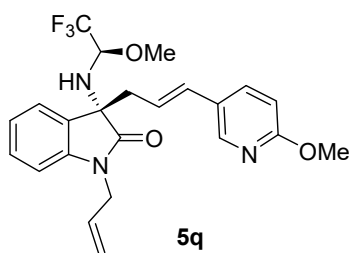

**(E)-1-allyl-3-(3-(6-methoxypyridin-3-yl)allyl)-3-((2,2,2-trifluoro-1-methoxyethyl)amino)indolin-2-one:**

Yellow solid; 64% yield.  $^1\text{H}$  NMR (400 MHz,  $\text{CDCl}_3$ )  $\delta$  7.91 (d,  $J = 2.2$  Hz, 1H), 7.44 (dd,  $J = 8.6, 2.4$  Hz, 1H), 7.40 – 7.29 (m, 2H), 7.19 – 7.08 (m, 1H), 6.86 (d,  $J = 8.2$  Hz, 1H), 6.63 (d,  $J = 8.6$  Hz, 1H), 6.24 (d,  $J = 15.9$  Hz, 1H), 5.88 – 5.62 (m, 2H), 5.27 – 5.03 (m, 2H), 4.53 – 4.38 (m, 1H), 4.23 – 4.11 (m, 1H), 4.01 – 3.87 (m, 4H), 3.12 (d,  $J = 12.7$  Hz, 1H), 2.93 (s, 3H), 2.81 (ddd,  $J = 13.2, 6.2, 1.2$  Hz, 1H), 2.63 (dd,  $J = 13.3, 8.8$  Hz, 1H).  $^{13}\text{C}$  NMR (101 MHz,  $\text{CDCl}_3$ )  $\delta$  178.87, 163.50, 145.19, 143.43, 135.46, 131.28, 131.03, 129.80, 126.21, 126.12, 124.83, 123.28 (q,  $J = 285.9$  Hz), 122.74, 121.42, 118.08, 110.75, 109.37, 85.00 (q,  $J = 31.8$  Hz), 63.31, 56.88, 56.87, 53.45, 42.43.  $^{19}\text{F}$  NMR (376 MHz,  $\text{CDCl}_3$ )  $\delta$  -78.94 (d,  $J = 4.7$  Hz). HRMS Calcd. For  $\text{C}_{23}\text{H}_{25}\text{F}_3\text{N}_3\text{O}_3$  ( $[\text{M}+\text{H}]^+$ ): 448.1843, found: 448.1842.

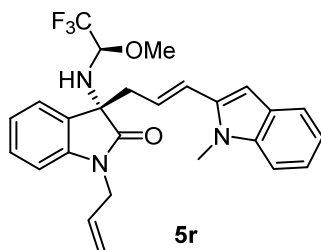

**(E)-1-allyl-3-(3-(1-methyl-1H-indol-2-yl)allyl)-3-((2,2,2-trifluoro-1-methoxyethyl)amino)indolin-2-one:**

Yellow solid; 76% yield.  $^1\text{H}$  NMR (400 MHz,  $\text{CDCl}_3$ )  $\delta$  7.50 (d,  $J = 7.8$  Hz, 1H), 7.40 – 7.29 (m, 2H), 7.22 (d,  $J = 8.2$  Hz, 1H), 7.19 – 7.10 (m, 2H), 7.09 – 7.01 (m, 1H), 6.87 (d,  $J = 7.8$  Hz, 1H), 6.41 (s, 1H), 6.37 (d,  $J = 15.7$  Hz, 1H), 5.93 (ddd,  $J = 15.5, 8.7, 6.5$  Hz, 1H), 5.79 – 5.65 (m, 1H), 5.28 – 5.01 (m, 2H), 4.39 (ddt,  $J = 16.0, 5.5, 1.5$  Hz, 1H), 4.21 (ddt,  $J = 16.1, 5.5, 1.3$  Hz, 1H), 3.98 (dq,  $J = 12.7, 4.8$  Hz, 1H), 3.56 (s, 3H), 3.14 (d,  $J = 12.7$  Hz, 1H), 2.98 – 2.82 (m, 4H), 2.67 (dd,  $J = 13.4, 9.0$  Hz, 1H).  $^{13}\text{C}$  NMR (101 MHz,  $\text{CDCl}_3$ )  $\delta$  178.87, 143.53, 137.69, 137.66, 131.29, 129.85, 127.71, 126.15, 125.07, 124.93, 124.15, 123.30 (q,  $J = 286.0$  Hz), 122.73, 121.54, 120.27, 119.71, 118.20, 109.49, 109.10, 98.72, 85.00 (q,  $J = 31.8$  Hz), 63.43, 56.84, 42.68, 42.52, 29.73.  $^{19}\text{F}$  NMR (376 MHz,  $\text{CDCl}_3$ )  $\delta$  -78.87 (d,  $J = 4.7$  Hz). HRMS Calcd. For  $\text{C}_{26}\text{H}_{27}\text{F}_3\text{N}_3\text{O}_2$  ( $[\text{M}+\text{H}]^+$ ): 470.2050, found: 470.2046.

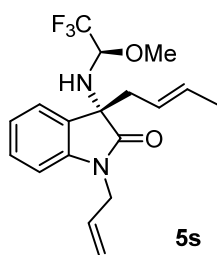

**(E)-1-allyl-3-(but-2-en-1-yl)-3-((2,2,2-trifluoro-1-methoxyethyl)amino)indolin-2-one:**

Yellow solid; 88% yield.  $^1\text{H}$  NMR (400 MHz,  $\text{CDCl}_3$ )  $\delta$  7.36 – 7.28 (m, 2H), 7.11 (td,  $J = 7.5$ , 0.8 Hz, 1H), 6.86 (d,  $J = 7.8$  Hz, 1H), 5.90 – 5.73 (m, 1H), 5.51 – 5.36 (m, 1H), 5.32 – 5.18 (m, 2H), 5.16 – 5.03 (m, 1H), 4.57 – 4.42 (m, 1H), 4.16 (ddt,  $J = 16.2$ , 5.5, 1.4 Hz, 1H), 3.92 (dq,  $J = 12.7$ , 4.8 Hz, 1H), 3.05 (d,  $J = 12.7$  Hz, 1H), 2.93 (s, 3H), 2.64 – 2.54 (m, 1H), 2.44 (dd,  $J = 13.2$ , 8.6 Hz, 1H).  $^{13}\text{C}$  NMR (101 MHz,  $\text{CDCl}_3$ )  $\delta$  179.1, 143.5, 131.5, 131.0, 129.5, 126.6, 124.7, 123.3 (q,  $J = 286.9$  Hz), 122.9, 122.6, 117.7, 109.2, 85.0 (q,  $J = 31.8$  Hz), 63.2, 56.8, 42.4, 42.2, 17.9.  $^{19}\text{F}$  NMR (376 MHz,  $\text{CDCl}_3$ )  $\delta$  -78.98 (d,  $J = 4.5$  Hz). HRMS Calcd. For  $\text{C}_{18}\text{H}_{21}\text{F}_3\text{N}_2\text{O}_2\text{Na}$  ( $[\text{M}+\text{Na}]^+$ ): 377.1447, found: 377.1447.

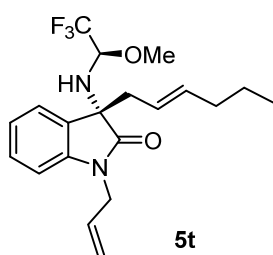

**(E)-1-allyl-3-(hex-2-en-1-yl)-3-((2,2,2-trifluoro-1-methoxyethyl)amino)indolin-2-one:**

Yellow solid; 98% yield.  $^1\text{H}$  NMR (400 MHz,  $\text{CDCl}_3$ )  $\delta$  7.35 – 7.27 (m, 2H), 7.11 (td,  $J = 7.5$ , 0.7 Hz, 1H), 6.86 (d,  $J = 7.8$  Hz, 1H), 5.92 – 5.71 (m, 1H), 5.47 – 5.33 (m, 1H), 5.33 – 5.20 (m, 2H), 5.15 – 5.01 (m, 1H), 4.42 (ddt,  $J = 16.1$ , 5.4, 1.5 Hz, 1H), 4.21 (ddt,  $J = 16.1$ , 5.5, 1.4 Hz, 1H), 3.93 (dq,  $J = 12.7$ , 4.9 Hz, 1H), 3.05 (d,  $J = 12.7$  Hz, 1H), 2.94 (s, 3H), 2.65 – 2.53 (m, 1H), 2.45 (dd,  $J = 13.2$ , 8.2 Hz, 1H), 1.94 – 1.74 (m, 2H), 1.29 – 1.14 (m, 2H), 0.75 (t,  $J = 7.4$  Hz, 3H).  $^{13}\text{C}$  NMR (101 MHz,  $\text{CDCl}_3$ )  $\delta$  179.1, 143.5, 136.4, 131.5, 129.5, 126.6, 124.8, 123.3 (q,  $J = 285.9$  Hz), 122.5, 121.8, 118.0, 109.2, 84.9 (q,  $J = 31.8$  Hz), 63.2, 56.7, 42.4, 42.3, 34.5, 22.3, 13.5.  $^{19}\text{F}$  NMR (376 MHz,  $\text{CDCl}_3$ )  $\delta$  -78.92 (d,  $J = 4.8$  Hz). HRMS Calcd. For  $\text{C}_{20}\text{H}_{25}\text{F}_3\text{N}_2\text{O}_2\text{Na}$  ( $[\text{M}+\text{Na}]^+$ ): 405.1760, found: 405.1754.

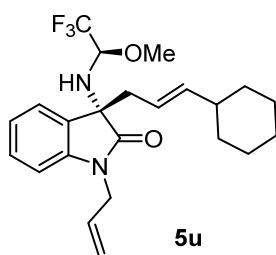

**(E)-1-allyl-3-(3-cyclohexylallyl)-3-((2,2,2-trifluoro-1-methoxyethyl)amino)indolin-2-one:**

Yellow solid; 90% yield.  $^1\text{H}$  NMR (400 MHz,  $\text{CDCl}_3$ )  $\delta$  7.34 – 7.27 (m, 2H), 7.10 (td,  $J = 7.5$ , 0.6 Hz, 1H), 6.86 (d,  $J = 7.8$  Hz, 1H), 5.90 – 5.69 (m, 1H), 5.38 – 5.17 (m, 3H), 5.13 – 4.98 (m, 1H), 4.37 (ddt,  $J = 15.9$ , 5.5, 1.3 Hz, 1H), 4.30 – 4.19 (m, 1H), 3.94 (dq,  $J = 12.7$ , 4.9 Hz, 1H), 3.05 (d,  $J = 12.7$  Hz, 1H), 2.94 (s, 3H), 2.56 (dd,  $J = 13.1$ , 6.5 Hz, 1H), 2.42 (dd,  $J = 13.1$ , 8.2 Hz, 1H), 1.83 – 1.70 (m, 1H), 1.68 – 1.38 (m, 5H), 1.26 – 1.00 (m, 3H), 0.96 – 0.79 (m, 2H).  $^{13}\text{C}$  NMR (101 MHz,  $\text{CDCl}_3$ )  $\delta$  179.1, 143.5, 142.5, 131.6, 129.5, 126.6, 124.8, 123.3 (q,  $J = 286.0$  Hz), 122.5, 119.0, 118.1, 109.1, 84.9 (q,  $J = 31.7$  Hz), 63.2, 56.6, 42.5, 42.2, 40.5, 32.8, 32.6, 26.1, 25.9, 25.8.  $^{19}\text{F}$  NMR (376 MHz,  $\text{CDCl}_3$ )  $\delta$  -78.90 (d,  $J = 4.8$  Hz). HRMS Calcd. For  $\text{C}_{23}\text{H}_{29}\text{F}_3\text{N}_2\text{O}_2\text{Na}$  ( $[\text{M}+\text{Na}]^+$ ): 445.2073, found: 445.2067.

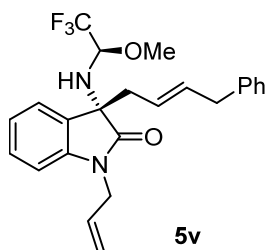

**(E)-1-allyl-3-(4-phenylbut-2-en-1-yl)-3-((2,2,2-trifluoro-1-methoxyethyl)amino)indolin-2-one:**

Yellow solid; 70% yield.  $^1\text{H}$  NMR (400 MHz,  $\text{CDCl}_3$ )  $\delta$  7.46 – 7.03 (m, 6H), 6.93 (d,  $J = 7.2$  Hz, 2H), 6.86 (d,  $J = 7.8$  Hz, 1H), 5.77 (ddd,  $J = 22.4$ , 10.6, 5.5 Hz, 1H), 5.62 – 5.48 (m, 1H), 5.34 – 5.14 (m, 3H), 4.27 (ddd,  $J = 48.0$ , 16.0, 5.4 Hz, 2H), 4.02 – 3.86 (m, 1H), 3.19 (d,  $J = 6.5$  Hz, 2H), 3.07 (d,  $J = 12.7$  Hz, 1H), 2.93 (s, 3H), 2.63 (dd,  $J = 13.2$ , 6.8 Hz, 1H), 2.50 (dd,  $J = 13.1$ , 7.9 Hz, 1H).  $^{13}\text{C}$  NMR (101 MHz,  $\text{CDCl}_3$ )  $\delta$  179.04, 143.51, 140.10, 134.71, 131.55, 129.55, 128.33, 128.31, 126.47, 125.93, 124.87, 123.54, 123.29 (q,  $J = 285.7$  Hz), 122.66, 118.10, 109.30, 84.94 (q,  $J = 31.7$  Hz), 63.16, 56.72, 42.45, 42.09, 38.80.  $^{19}\text{F}$  NMR (376 MHz,  $\text{CDCl}_3$ )  $\delta$  -78.88 (d,  $J = 4.4$  Hz). HRMS Calcd. For  $\text{C}_{24}\text{H}_{25}\text{F}_3\text{N}_2\text{O}_2\text{Na}$  ( $[\text{M}+\text{Na}]^+$ ): 453.1760,

found: 453.1758.

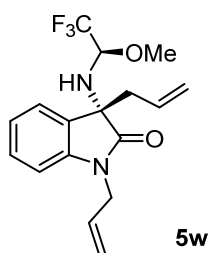

**1,3-diallyl-3-((2,2,2-trifluoro-1-methoxyethyl)amino)indolin-2-one:**

Yellow solid; 70% yield.  $^1\text{H}$  NMR (400 MHz,  $\text{CDCl}_3$ )  $\delta$  7.39 – 7.29 (m, 2H), 7.12 (td,  $J = 7.5$ , 0.8 Hz, 1H), 6.88 (d,  $J = 7.7$  Hz, 1H), 5.91 – 5.75 (m, 1H), 5.61 – 5.45 (m, 1H), 5.37 – 5.19 (m, 2H), 5.08 – 4.95 (m, 2H), 4.43 (ddt,  $J = 16.1$ , 5.4, 1.6 Hz, 1H), 4.23 (ddt,  $J = 16.1$ , 5.6, 1.4 Hz, 1H), 3.93 (dq,  $J = 12.7$ , 4.8 Hz, 1H), 3.06 (d,  $J = 12.7$  Hz, 1H), 2.93 (s, 3H), 2.72 – 2.60 (m, 1H), 2.49 (dd,  $J = 13.3$ , 8.4 Hz, 1H).  $^{13}\text{C}$  NMR (101 MHz,  $\text{CDCl}_3$ )  $\delta$  178.9, 143.5, 131.5, 130.6, 129.6, 126.3, 124.8, 123.3 (q,  $J = 286.0$  Hz), 122.6, 120.2, 118.1, 109.3, 84.9 (q,  $J = 31.8$  Hz), 62.8, 56.7, 43.2, 42.5.  $^{19}\text{F}$  NMR (376 MHz,  $\text{CDCl}_3$ )  $\delta$  -78.91 (d,  $J = 4.8$  Hz). HRMS Calcd. For  $\text{C}_{17}\text{H}_{19}\text{F}_3\text{N}_2\text{O}_2\text{Na}$  ( $[\text{M}+\text{Na}]^+$ ): 363.1291, found: 363.1286.

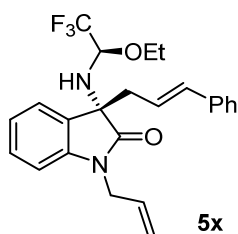

**1-allyl-3-cinnamyl-3-((1-ethoxy-2,2,2-trifluoroethyl)amino)indolin-2-one:**

Yellow solid; 77% yield.  $^1\text{H}$  NMR (400 MHz,  $\text{CDCl}_3$ )  $\delta$  7.36 – 7.28 (m, 2H), 7.25 – 7.08 (m, 6H), 6.83 (d,  $J = 7.7$  Hz, 1H), 6.30 (d,  $J = 15.9$  Hz, 1H), 5.95 – 5.80 (m, 1H), 5.76 – 5.59 (m, 1H), 5.22 – 4.98 (m, 2H), 4.56 (ddt,  $J = 16.1$ , 4.8, 1.6 Hz, 1H), 4.07 – 3.94 (m, 2H), 3.44 – 3.32 (m, 1H), 3.08 (d,  $J = 12.5$  Hz, 1H), 2.86 – 2.77 (m, 2H), 2.63 (dd,  $J = 13.2$ , 8.8 Hz, 1H), 0.96 (t,  $J = 7.0$  Hz, 3H).  $^{13}\text{C}$  NMR (101 MHz,  $\text{CDCl}_3$ )  $\delta$  178.5, 143.4, 136.9, 135.0, 131.2, 129.7, 128.4, 127.4, 126.6, 126.2, 124.8, 123.3 (q,  $J = 285.7$  Hz), 122.7, 122.0, 118.0, 109.3, 83.5 (q,  $J = 31.8$  Hz), 65.1, 63.5, 42.9, 42.4, 14.9.  $^{19}\text{F}$  NMR (376 MHz,  $\text{CDCl}_3$ )  $\delta$  -79.04 (d,  $J = 5.0$  Hz). HRMS Calcd. For  $\text{C}_{24}\text{H}_{25}\text{F}_3\text{N}_2\text{O}_2\text{Na}$  ( $[\text{M}+\text{Na}]^+$ ): 453.1760, found: 453.1757.

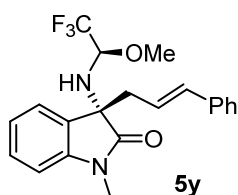

### 3-cinnamyl-1-methyl-3-((2,2,2-trifluoro-1-methoxyethyl)amino)indolin-2-one:

Yellow solid; 59% yield.  $^1\text{H}$  NMR (400 MHz,  $\text{CDCl}_3$ )  $\delta$  7.40 – 7.30 (m, 2H), 7.29 – 7.16 (m, 5H), 7.12 (t,  $J = 7.4$  Hz, 1H), 6.87 (d,  $J = 7.8$  Hz, 1H), 6.32 (d,  $J = 15.8$  Hz, 1H), 6.07 – 5.88 (m, 1H), 3.90 (dq,  $J = 12.7, 4.7$  Hz, 1H), 3.19 (s, 3H), 3.10 (d,  $J = 12.7$  Hz, 1H), 2.93 (s, 3H), 2.80 (ddd,  $J = 13.4, 6.1, 1.1$  Hz, 1H), 2.59 (dd,  $J = 13.4, 8.8$  Hz, 1H).  $^{13}\text{C}$  NMR (101 MHz,  $\text{CDCl}_3$ )  $\delta$  179.4, 144.2, 137.1, 134.8, 129.9, 128.5, 127.4, 126.4, 126.2, 125.0, 123.3 (q,  $J = 285.8$  Hz), 122.8, 122.2, 108.4, 85.3 (q,  $J = 31.8$  Hz), 63.2, 57.2, 42.0, 26.2.  $^{19}\text{F}$  NMR (376 MHz,  $\text{CDCl}_3$ )  $\delta$  -79.16 (d,  $J = 4.6$  Hz). HRMS Calcd. For  $\text{C}_{21}\text{H}_{21}\text{F}_3\text{N}_2\text{O}_2\text{Na}$  ( $[\text{M}+\text{Na}]^+$ ): 413.1447, found: 413.1441.

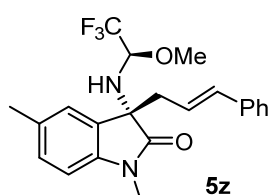

### 3-cinnamyl-1,5-dimethyl-3-((2,2,2-trifluoro-1-methoxyethyl)amino)indolin-2-one:

Yellow solid; 74% yield.  $^1\text{H}$  NMR (400 MHz,  $\text{CDCl}_3$ )  $\delta$  7.28 – 7.11 (m, 7H), 6.75 (d,  $J = 7.8$  Hz, 1H), 6.33 (d,  $J = 15.8$  Hz, 1H), 5.99 – 5.86 (m, 1H), 3.92 (dq,  $J = 12.7, 4.8$  Hz, 1H), 3.16 (s, 3H), 3.08 (d,  $J = 12.7$  Hz, 1H), 2.94 (s, 3H), 2.77 (ddd,  $J = 13.5, 6.2, 1.2$  Hz, 1H), 2.60 (dd,  $J = 13.4, 8.8$  Hz, 1H), 2.37 (s, 3H).  $^{13}\text{C}$  NMR (101 MHz,  $\text{CDCl}_3$ )  $\delta$  179.3, 141.8, 137.2, 134.7, 132.4, 130.2, 128.4, 127.3, 126.4, 126.2, 125.6, 123.3 (q,  $J = 285.7$  Hz), 122.3, 108.2, 85.2 (q,  $J = 31.8$  Hz), 63.3, 57.2, 42.1, 26.2, 21.2.  $^{19}\text{F}$  NMR (376 MHz,  $\text{CDCl}_3$ )  $\delta$  -79.16 (d,  $J = 4.7$  Hz). HRMS Calcd. For  $\text{C}_{22}\text{H}_{23}\text{F}_3\text{N}_2\text{O}_2\text{Na}$  ( $[\text{M}+\text{Na}]^+$ ): 427.1604, found: 427.1599.

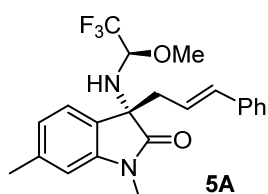

### 3-cinnamyl-1,6-dimethyl-3-((2,2,2-trifluoro-1-methoxyethyl)amino)indolin-2-one:



Yellow solid; 67% yield.  $^1\text{H}$  NMR (400 MHz,  $\text{CDCl}_3$ )  $\delta$  7.31 – 7.14 (m, 6H), 6.92 (d,  $J = 7.4$  Hz, 1H), 6.69 (s, 1H), 6.32 (d,  $J = 15.8$  Hz, 1H), 6.05 – 5.91 (m, 1H), 3.90 (dq,  $J = 12.6, 4.8$  Hz, 1H), 3.18 (s, 3H), 3.06 (d,  $J = 12.7$  Hz, 1H), 2.94 (s, 3H), 2.84 – 2.73 (m, 1H), 2.56 (dd,  $J = 13.4, 8.9$  Hz, 1H), 2.40 (s, 3H).  $^{13}\text{C}$  NMR (101 MHz,  $\text{CDCl}_3$ )  $\delta$  179.69, 144.25, 140.19, 137.16, 134.64, 128.44, 127.34, 126.25, 124.75, 123.34, 123.32 (q,  $J = 287.3$  Hz), 123.31, 122.47, 109.34, 85.22 (q,  $J = 31.8$  Hz), 63.08, 57.19, 42.04, 26.11, 21.95.  $^{19}\text{F}$  NMR (376 MHz,  $\text{CDCl}_3$ )  $\delta$  -79.16 (d,  $J = 4.6$  Hz). HRMS Calcd. For  $\text{C}_{22}\text{H}_{23}\text{F}_3\text{N}_2\text{O}_2\text{Na}$  ( $[\text{M}+\text{Na}]^+$ ): 427.1604, found: 427.1601.

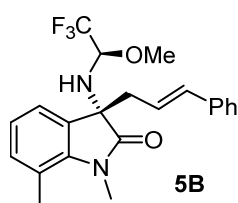

**3-cinnamyl-1,7-dimethyl-3-((2,2,2-trifluoro-1-methoxyethyl)amino)indolin-2-one:**

Yellow solid; 68% yield.  $^1\text{H}$  NMR (400 MHz,  $\text{CDCl}_3$ )  $\delta$  7.29 – 7.13 (m, 6H), 7.08 (d,  $J = 7.5$  Hz, 1H), 7.00 (t,  $J = 7.5$  Hz, 1H), 6.32 (d,  $J = 15.8$  Hz, 1H), 6.06 – 5.84 (m, 1H), 3.91 (dq,  $J = 12.7, 4.8$  Hz, 1H), 3.46 (s, 3H), 3.08 (d,  $J = 12.7$  Hz, 1H), 2.98 (s, 3H), 2.75 (ddd,  $J = 13.3, 6.1, 1.0$  Hz, 1H), 2.64 – 2.51 (m, 4H).  $^{13}\text{C}$  NMR (101 MHz,  $\text{CDCl}_3$ )  $\delta$  180.1, 142.0, 137.2, 134.7, 133.5, 128.5, 127.4, 127.1, 126.3, 123.3 (q,  $J = 285.8$  Hz), 122.8, 122.7, 122.3, 120.1, 85.1 (q,  $J = 31.8$  Hz), 62.5, 57.0, 42.4, 29.6, 19.1.  $^{19}\text{F}$  NMR (376 MHz,  $\text{CDCl}_3$ )  $\delta$  -79.10 (d,  $J = 4.6$  Hz). HRMS Calcd. For  $\text{C}_{22}\text{H}_{23}\text{F}_3\text{N}_2\text{O}_2\text{Na}$  ( $[\text{M}+\text{Na}]^+$ ): 427.1604, found: 427.1603.

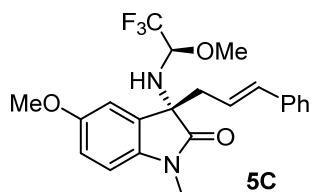

**3-cinnamyl-5-methoxy-1-methyl-3-((2,2,2-trifluoro-1-methoxyethyl)amino)indolin-2-one:**

Yellow solid; 64% yield.  $^1\text{H}$  NMR (400 MHz,  $\text{CDCl}_3$ )  $\delta$  7.31 – 7.15 (m, 5H), 6.94 (d,  $J = 2.5$  Hz, 1H), 6.89 (dd,  $J = 8.5, 2.5$  Hz, 1H), 6.77 (d,  $J = 8.5$  Hz, 1H), 6.34 (d,  $J = 15.8$  Hz, 1H), 6.02 – 5.87 (m, 1H), 3.93 (dq,  $J = 12.6, 4.7$  Hz, 1H), 3.78 (s, 3H), 3.17 (s, 3H), 3.10 (d,  $J = 12.7$  Hz, 1H), 2.96 (s, 3H), 2.78 (ddd,  $J = 13.3, 6.2, 1.2$  Hz, 1H), 2.60 (dd,  $J = 13.4, 8.8$  Hz, 1H).  $^{13}\text{C}$  NMR (101 MHz,  $\text{CDCl}_3$ )  $\delta$  179.0, 156.1, 137.6, 137.1, 134.9, 128.5, 127.7, 127.4, 126.2, 123.3

(q,  $J = 285.9$  Hz), 122.1, 114.2, 112.0, 108.9, 85.2 (q,  $J = 31.9$  Hz), 63.7, 57.3, 55.8, 42.1, 26.2.  $^{19}\text{F}$  NMR (376 MHz,  $\text{CDCl}_3$ )  $\delta$  -79.20 (d,  $J = 4.4$  Hz). HRMS Calcd. For  $\text{C}_{22}\text{H}_{23}\text{F}_3\text{N}_2\text{O}_3\text{Na}$  ( $[\text{M}+\text{Na}]^+$ ): 443.1553, found: 443.1549.

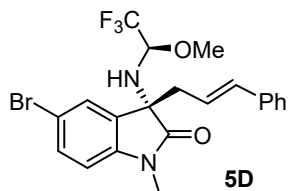

**5-bromo-3-cinnamyl-1-methyl-3-((2,2,2-trifluoro-1-methoxyethyl)amino)indolin-2-one:**

Yellow solid; 87% yield.  $^1\text{H}$  NMR (400 MHz,  $\text{CDCl}_3$ )  $\delta$  7.50 (dd,  $J = 8.3, 2.0$  Hz, 1H), 7.46 (d,  $J = 1.9$  Hz, 1H), 7.29 – 7.16 (m, 5H), 6.74 (d,  $J = 8.3$  Hz, 1H), 6.35 (d,  $J = 15.8$  Hz, 1H), 5.96 – 5.79 (m, 1H), 3.99 – 3.85 (m, 1H), 3.16 (s, 3H), 3.12 (d,  $J = 12.7$  Hz, 1H), 2.97 (s, 3H), 2.76 (ddd,  $J = 13.3, 6.3, 1.2$  Hz, 1H), 2.62 (dd,  $J = 13.4, 8.7$  Hz, 1H).  $^{13}\text{C}$  NMR (101 MHz,  $\text{CDCl}_3$ )  $\delta$  178.7, 143.3, 136.9, 135.4, 132.8, 128.6, 128.5, 127.9, 127.6, 126.3, 123.1 (q,  $J = 286.0$  Hz), 121.3, 115.5, 109.9, 85.2 (q,  $J = 32.0$  Hz), 63.4, 57.2, 42.1, 26.2.  $^{19}\text{F}$  NMR (376 MHz,  $\text{CDCl}_3$ )  $\delta$  -79.01 (d,  $J = 4.3$  Hz). HRMS Calcd. For  $\text{C}_{21}\text{H}_{20}\text{BrF}_3\text{N}_2\text{O}_2\text{Na}$  ( $[\text{M}+\text{Na}]^+$ ): 491.0552, found: 491.0547.

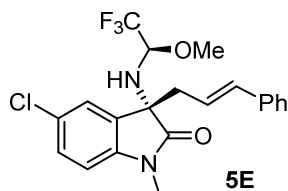

**5-chloro-3-cinnamyl-1-methyl-3-((2,2,2-trifluoro-1-methoxyethyl)amino)indolin-2-one:**

Yellow solid; 68% yield.  $^1\text{H}$  NMR (400 MHz,  $\text{CDCl}_3$ )  $\delta$  7.38 – 7.30 (m, 2H), 7.28 – 7.15 (m, 5H), 6.79 (d,  $J = 8.2$  Hz, 1H), 6.34 (d,  $J = 15.8$  Hz, 1H), 5.96 – 5.81 (m, 1H), 3.91 (dq,  $J = 12.8, 4.7$  Hz, 1H), 3.17 (s, 3H), 3.12 (d,  $J = 12.7$  Hz, 1H), 2.97 (s, 3H), 2.77 (ddd,  $J = 13.3, 6.3, 1.3$  Hz, 1H), 2.62 (dd,  $J = 13.4, 8.7$  Hz, 1H).  $^{13}\text{C}$  NMR (101 MHz,  $\text{CDCl}_3$ )  $\delta$  178.85, 142.77, 136.86, 135.37, 129.93, 128.49, 128.28, 128.27, 127.55, 126.28, 125.16, 123.14 (q,  $J = 286.0$  Hz), 121.37, 109.37, 85.18 (q,  $J = 31.9$  Hz), 63.42, 57.19, 42.08, 26.27.  $^{19}\text{F}$  NMR (376 MHz,  $\text{CDCl}_3$ )  $\delta$  -79.03 (d,  $J = 4.4$  Hz). HRMS Calcd. For  $\text{C}_{21}\text{H}_{20}\text{ClF}_3\text{N}_2\text{O}_2\text{Na}$  ( $[\text{M}+\text{Na}]^+$ ): 447.1058, found: 447.1050.

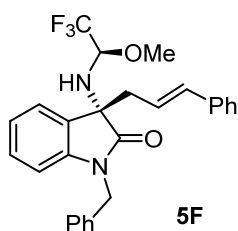

**1-benzyl-3-cinnamyl-3-((2,2,2-trifluoro-1-methoxyethyl)amino)indolin-2-one:**

Yellow solid; 56% yield.  $^1\text{H}$  NMR (400 MHz,  $\text{CDCl}_3$ )  $\delta$  7.35 (dd,  $J = 7.3, 0.7$  Hz, 1H), 7.28 – 7.06 (m, 10H), 7.00 (t,  $J = 7.6$  Hz, 2H), 6.72 (d,  $J = 7.8$  Hz, 1H), 6.38 (d,  $J = 15.9$  Hz, 1H), 5.93 – 5.77 (m, 1H), 5.15 (d,  $J = 15.6$  Hz, 1H), 4.58 (d,  $J = 15.6$  Hz, 1H), 3.96 (dq,  $J = 12.7, 4.8$  Hz, 1H), 3.16 (d,  $J = 12.7$  Hz, 1H), 2.89 (ddd,  $J = 13.2, 6.1, 1.4$  Hz, 1H), 2.84 (s, 3H), 2.73 (dd,  $J = 13.3, 9.1$  Hz, 1H).  $^{13}\text{C}$  NMR (101 MHz,  $\text{CDCl}_3$ )  $\delta$  179.33, 143.57, 136.87, 135.43, 135.13, 129.83, 128.70, 128.51, 127.53, 127.48, 127.36, 126.35, 126.25, 124.83, 123.34 (q,  $J = 285.8$  Hz), 122.81, 121.98, 109.54, 85.04 (q,  $J = 31.8$  Hz), 63.41, 56.83, 44.01, 42.56.  $^{19}\text{F}$  NMR (376 MHz,  $\text{CDCl}_3$ )  $\delta$  -78.89 (d,  $J = 4.8$  Hz). HRMS Calcd. For  $\text{C}_{27}\text{H}_{25}\text{F}_3\text{N}_2\text{O}_2\text{Na}$  ( $[\text{M}+\text{Na}]^+$ ): 489.1760, found: 489.1755.

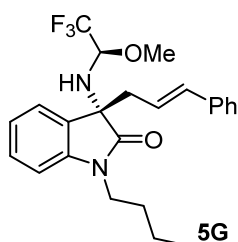

**1-butyl-3-cinnamyl-3-((2,2,2-trifluoro-1-methoxyethyl)amino)indolin-2-one:**

Yellow solid; 60% yield.  $^1\text{H}$  NMR (400 MHz,  $\text{CDCl}_3$ )  $\delta$  7.37 – 7.31 (m, 2H), 7.25 – 7.13 (m, 5H), 7.11 (td,  $J = 7.5, 0.6$  Hz, 1H), 6.86 (d,  $J = 7.7$  Hz, 1H), 6.30 (d,  $J = 15.9$  Hz, 1H), 5.95 – 5.79 (m, 1H), 3.95 (dq,  $J = 12.7, 4.8$  Hz, 1H), 3.84 – 3.69 (m, 1H), 3.53 (dt,  $J = 14.2, 7.2$  Hz, 1H), 3.09 (d,  $J = 12.7$  Hz, 1H), 2.92 (s, 3H), 2.80 (ddd,  $J = 13.2, 6.1, 1.3$  Hz, 1H), 2.61 (dd,  $J = 13.3, 8.9$  Hz, 1H), 1.59 – 1.47 (m, 2H), 1.37 – 1.22 (m, 2H), 0.81 (t,  $J = 7.3$  Hz, 3H).  $^{13}\text{C}$  NMR (101 MHz,  $\text{CDCl}_3$ )  $\delta$  179.0, 143.8, 137.0, 134.8, 129.8, 128.4, 127.4, 126.5, 126.2, 125.0, 123.3 (q,  $J = 285.9$  Hz), 122.5, 122.1, 108.6, 85.1 (q,  $J = 31.7$  Hz), 63.3, 56.9, 42.5, 39.9, 29.8, 20.2, 13.6.  $^{19}\text{F}$  NMR (376 MHz,  $\text{CDCl}_3$ )  $\delta$  -78.98 (d,  $J = 4.6$  Hz). HRMS Calcd. For  $\text{C}_{24}\text{H}_{27}\text{F}_3\text{N}_2\text{O}_2\text{Na}$  ( $[\text{M}+\text{Na}]^+$ ): 455.1917, found: 455.1914.

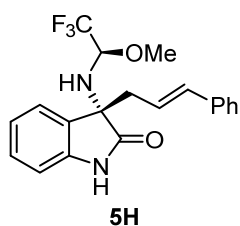

**3-cinnamyl-3-((2,2,2-trifluoro-1-methoxyethyl)amino)indolin-2-one:**

Yellow solid; 17% yield.  $^1\text{H}$  NMR (400 MHz,  $\text{CDCl}_3$ )  $\delta$  7.91 (s, 1H), 7.33 – 7.28 (m, 2H), 7.25 – 7.16 (m, 5H), 7.13 – 7.08 (m, 1H), 6.91 (d,  $J = 7.6$  Hz, 1H), 6.34 (d,  $J = 15.6$  Hz, 1H), 6.05 – 5.90 (m, 1H), 3.99 – 3.89 (m, 1H), 3.11 (d,  $J = 12.8$  Hz, 1H), 3.00 (s, 3H), 2.80 (dd,  $J = 13.6, 6.4$  Hz, 1H), 2.61 (dd,  $J = 13.6, 8.8$  Hz, 1H).  $^{13}\text{C}$  NMR (101 MHz,  $\text{CDCl}_3$ )  $\delta$  181.0, 141.1, 137.0, 135.0, 129.8, 128.4, 127.4, 126.7, 126.2, 125.3, 123.3 (q,  $J = 285.8$  Hz), 122.8, 121.9, 110.2, 85.3 (q,  $J = 31.3$  Hz), 63.6, 57.5, 42.2.  $^{19}\text{F}$  NMR (376 MHz, Chloroform-*d*)  $\delta$  -79.19 (d,  $J = 4.5$  Hz). HRMS Calcd. For  $\text{C}_{20}\text{H}_{19}\text{F}_3\text{N}_2\text{O}_2\text{Na}^+$  ( $[\text{M}+\text{Na}]^+$ ): 399.1291, found: 399.1321.

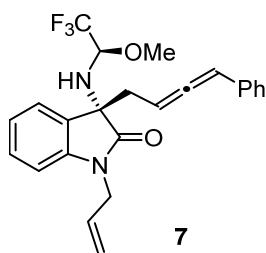

**1-allyl-3-(4-phenylbuta-2,3-dien-1-yl)-3-((2,2,2-trifluoro-1-methoxyethyl)amino)indolin-2-one:**

Yellow solid; 46% yield.  $^1\text{H}$  NMR (400 MHz,  $\text{CDCl}_3$ )  $\delta$  7.46 – 7.32 (m, 2H), 7.30 – 7.21 (m, 2H), 7.21 – 7.09 (m, 4H), 6.90 (d,  $J = 7.8$  Hz, 1H), 5.97 – 5.75 (m, 2H), 5.49 – 5.17 (m, 3H), 4.52 – 4.23 (m, 2H), 4.07 – 3.90 (m, 1H), 3.16 (d,  $J = 12.8$  Hz, 1H), 2.95 (s, 3H), 2.72 (ddd,  $J = 13.7, 6.3, 3.4$  Hz, 1H), 2.56 (ddd,  $J = 13.7, 9.0, 1.4$  Hz, 1H).  $^{13}\text{C}$  NMR (101 MHz,  $\text{CDCl}_3$ )  $\delta$  207.3, 178.8, 143.6, 133.9, 131.4, 129.8, 128.5, 126.9, 126.8, 126.1, 125.1, 123.3 (q,  $J = 286.0$  Hz), 122.7, 118.4, 109.5, 94.5, 87.6, 84.9 (q,  $J = 31.9$  Hz), 62.6, 56.7, 42.6, 38.7.  $^{19}\text{F}$  NMR (376 MHz,  $\text{CDCl}_3$ )  $\delta$  -78.81 (d,  $J = 4.8$  Hz). HRMS Calcd. For  $\text{C}_{24}\text{H}_{23}\text{F}_3\text{N}_2\text{O}_2\text{Na}$  ( $[\text{M}+\text{Na}]^+$ ): 451.1603, found: 451.1603.

### 3. Synthetic Applications

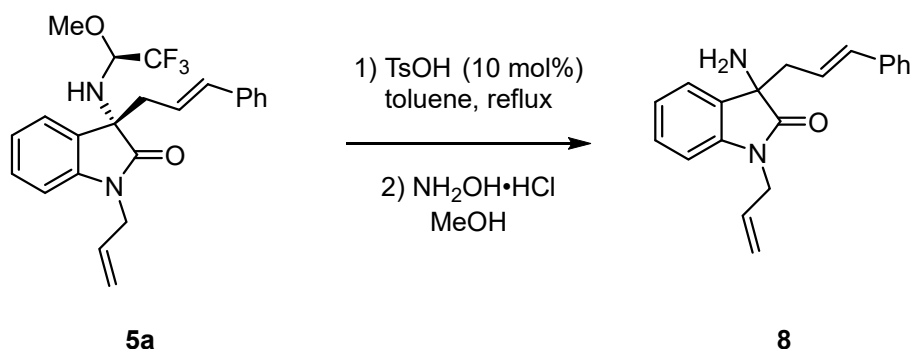

In a 50 mL round-bottom flask, **5a** (2.0 mmol) and TsOH (0.2 mmol) were dissolved in 20 mL toluene. Equipped with a reflux condenser, a magnetic stirring bar and Dean-Stark trap, the system was heated to reflux for 3 hours.<sup>[1]</sup> After cooling to rt,  $\text{NH}_2\text{OH}\cdot\text{HCl}$  was added. The reaction was stirred for 0.5 h at rt, then solvent was removed by rotary evaporation, **8** were obtained by chromatography on silica gel (PE/EA/ $\text{Et}_3\text{N}$  = 5:1:1) as colorless oil.

#### 1-allyl-3-amino-3-cinnamylindolin-2-one:

Colourless oil; 81% yield.  $^1\text{H}$  NMR (400 MHz,  $\text{CDCl}_3$ )  $\delta$  7.42 (dd,  $J$  = 7.4, 0.8 Hz, 1H), 7.31 – 7.13 (m, 6H), 7.09 (td,  $J$  = 7.6, 0.9 Hz, 1H), 6.80 (d,  $J$  = 7.8 Hz, 1H), 6.37 (d,  $J$  = 15.8 Hz, 1H), 6.02 – 5.83 (m, 1H), 5.71 (ddt,  $J$  = 17.1, 10.4, 5.3 Hz, 1H), 5.22 – 4.97 (m, 2H), 4.43 (ddt,  $J$  = 16.3, 5.0, 1.7 Hz, 1H), 4.13 (ddt,  $J$  = 16.3, 5.4, 1.5 Hz, 1H), 2.77 (ddd,  $J$  = 13.2, 6.5, 1.4 Hz, 1H), 2.66 (ddd,  $J$  = 13.2, 8.6, 0.8 Hz, 1H), 2.10 (brs, 2H).  $^{13}\text{C}$  NMR (101 MHz,  $\text{CDCl}_3$ )  $\delta$  179.8, 142.4, 137.0, 134.6, 131.4, 131.2, 129.0, 128.4, 127.3, 126.2, 123.9, 122.9, 122.8, 117.6, 109.2, 61.4, 42.9, 42.3. HRMS Calcd. For  $\text{C}_{20}\text{H}_{20}\text{N}_2\text{O}$  ( $[\text{M}+\text{Na}]^+$ ): 327.1468, found: 327.1463.

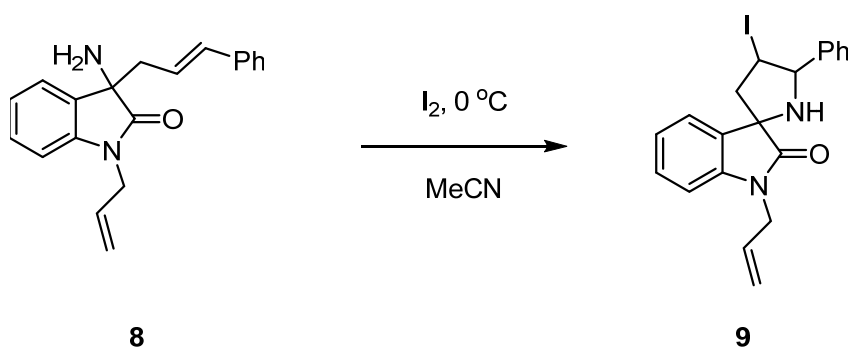

**8** (0.2 mmol), I<sub>2</sub> (0.4 mmol) and CH<sub>3</sub>CN (1 mL) were added to a 5-mL vial equipped with stirring bar. The mixture was stirred at 0 °C for 4 h, and TLC showed that **8** was disappeared. The mixture was stirred for 10 min before quenched by addition of CH<sub>2</sub>Cl<sub>2</sub> (5 mL) and saturated Na<sub>2</sub>S<sub>2</sub>O<sub>3</sub> (5 mL), and the aqueous layer was extracted with additional portions of CH<sub>2</sub>Cl<sub>2</sub>. The combined organic layers were combined, concentrated, purified by flash chromatography on silica gel (PE/EA = 5:1) to give the inseparable products **9**.

#### 1-allyl-4'-iodo-5'-phenylspiro[indoline-3,2'-pyrrolidin]-2-one:

Colourless oil; 81% yield. <sup>1</sup>H NMR (400 MHz, CDCl<sub>3</sub>) δ 7.70 – 7.61 (m, 1H), 7.60 – 7.53 (m, 1H), 7.50 – 7.26 (m, 5H), 7.17 – 7.07 (m, 1H), 6.83 (dd, *J* = 7.7, 3.9 Hz, 1H), 5.92 – 5.74 (m, 1H), 5.31 – 5.17 (m, 2H), 4.97<sub>major</sub> (d, *J* = 10.0 Hz, 0.6H), 4.71<sub>minor</sub> (d, *J* = 10.0 Hz, 0.4H), 4.66 – 4.16 (m, 3H), 2.90 (ddd, *J* = 14.9, 13.2, 8.8 Hz, 1H), 2.77 – 2.62 (m, 1H), 2.39 (brs, 1H). Major: <sup>13</sup>C NMR (101 MHz, CDCl<sub>3</sub>) 179.53, 142.21, 138.94, 133.63, 131.23, 129.05, 128.57, 128.39, 127.44, 123.27, 123.08, 117.81, 109.31, 72.12, 66.96, 49.65, 42.54, 26.39. Minor: <sup>13</sup>C NMR (101 MHz, CDCl<sub>3</sub>) δ 179.59, 142.21, 138.98, 132.83, 131.17, 129.09, 128.75, 128.45, 127.83, 123.46, 123.22, 117.83, 109.25, 74.17, 67.85, 50.53, 42.54, 26.59. HRMS Calcd. For C<sub>20</sub>H<sub>20</sub>IN<sub>2</sub>O ([M+Na]<sup>+</sup>): 431.0615, found: 431.0607.

#### 4. Proposed mechanism for cascade umpolung allylation/acetalation

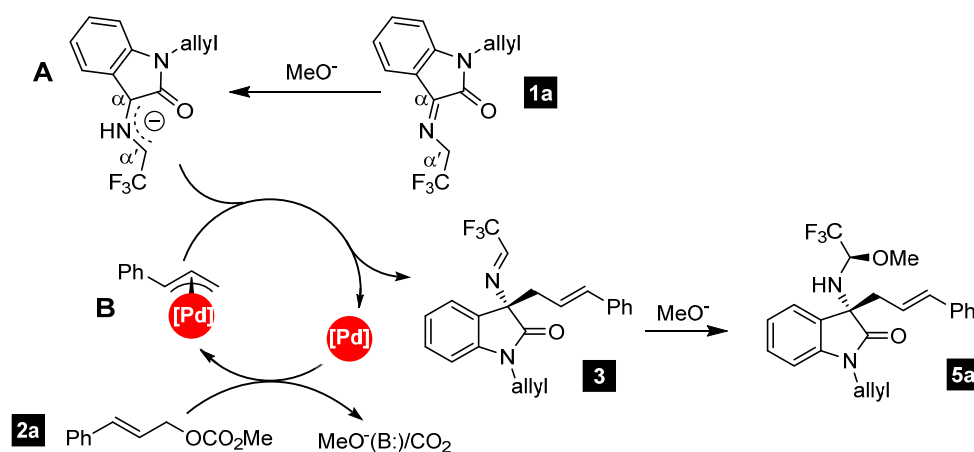

**Scheme S1.** Proposed Mechanism for cascade umpolung allylation/Acetalation

Under basic condition, *N*-2,2,2-trifluoroethylisatin ketimine **1a** is deprotonated to form 2-azaallyl carbanion **A**. Coordination of allylic carbonate **2a** to Pd(0) followed by oxidative addition-decarboxylation gives Pd- $\pi$ -Allyl species (**B**). The nucleophilic attack of 2-azaallyl carbanion **A** to electrophilic  $\pi$ -allyl Pd (**B**) generates the allylation product **3** and completes the catalytic cycles. Then, the imine moiety of **3** is attacked by methoxide to form the final product **5a**.

## 5. References

[1] H. Mimura, K. Kawada, T. Yamashita, T. Sakamoto, Y. Kikugawa, *J. Fluorine Chem.* **2010**, *131*, 477-486.

## 6. NMR spectra

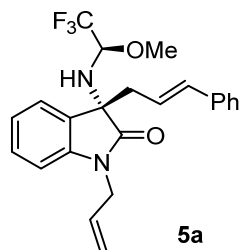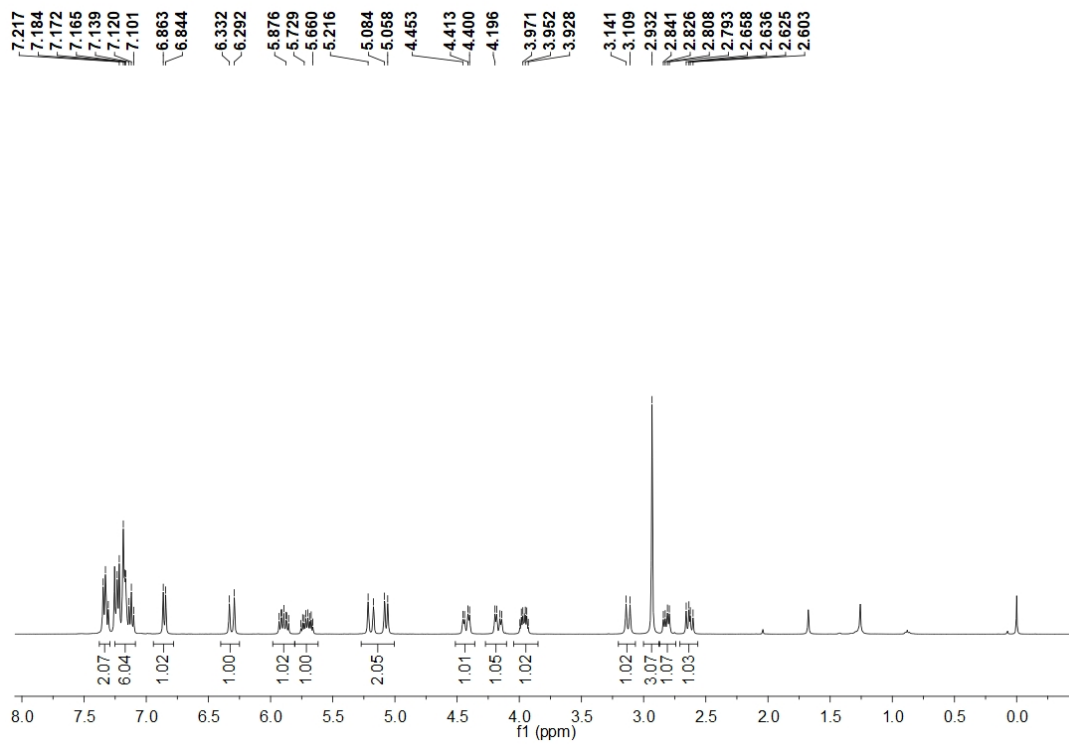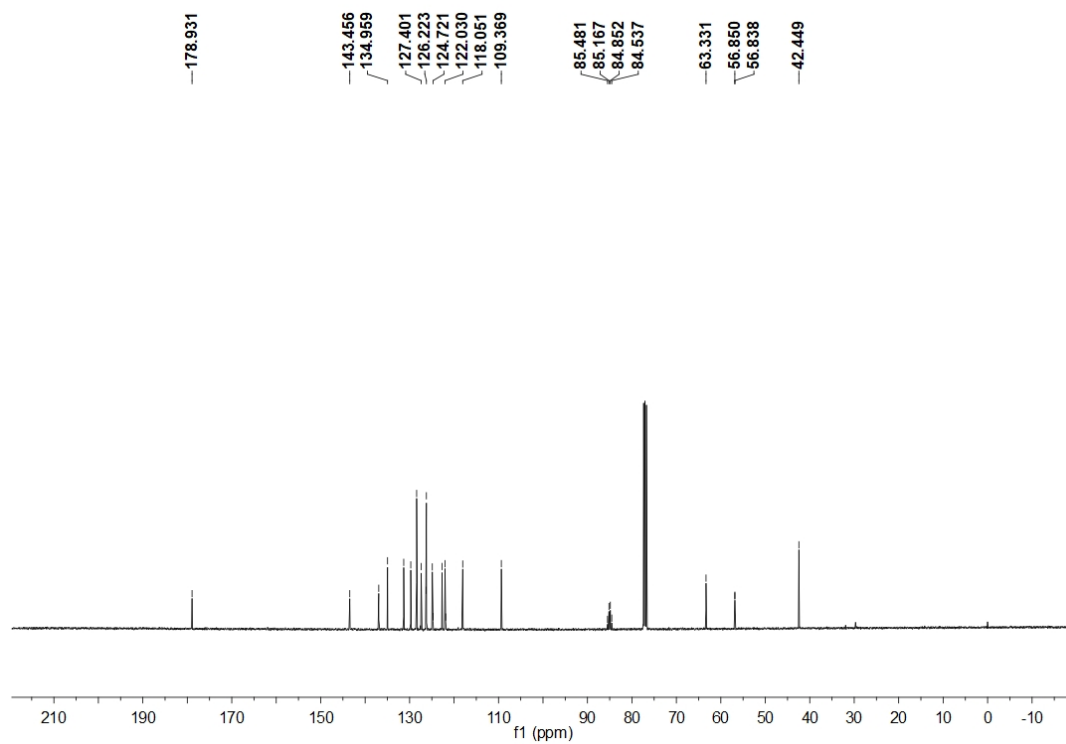



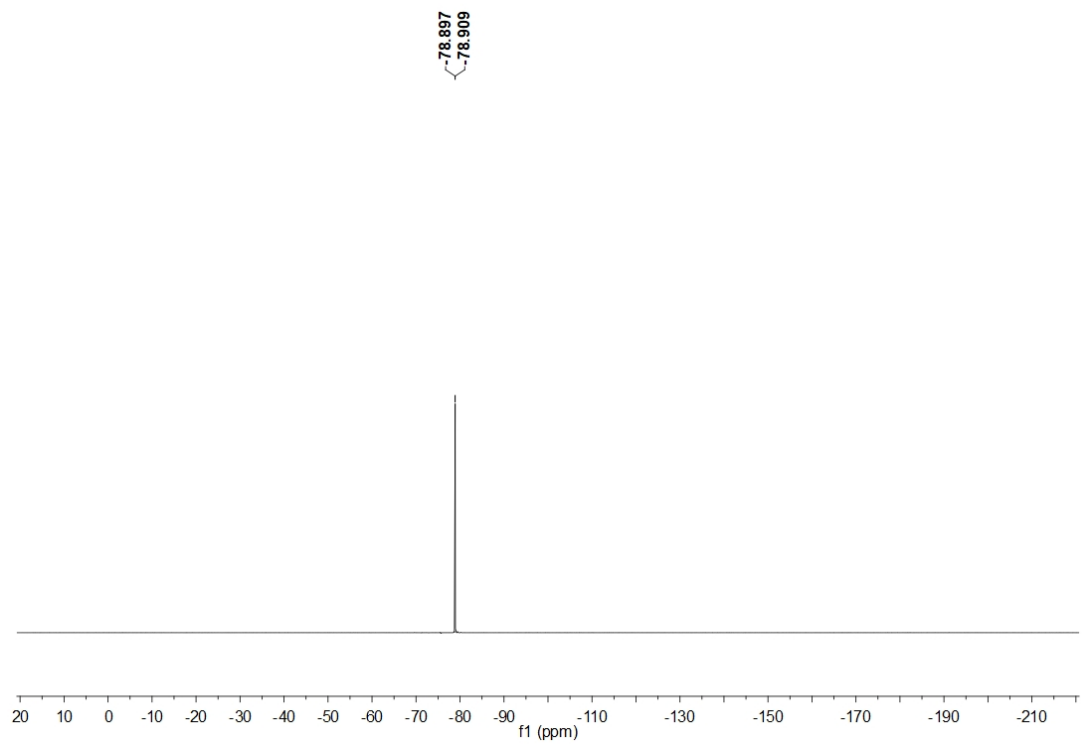



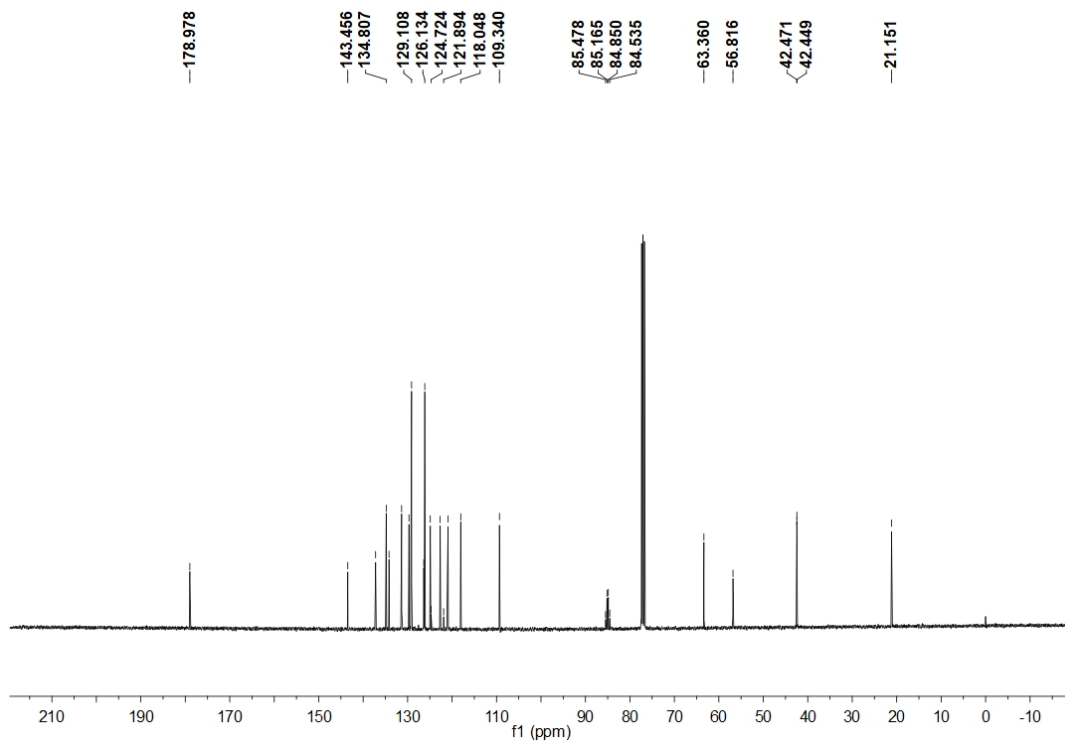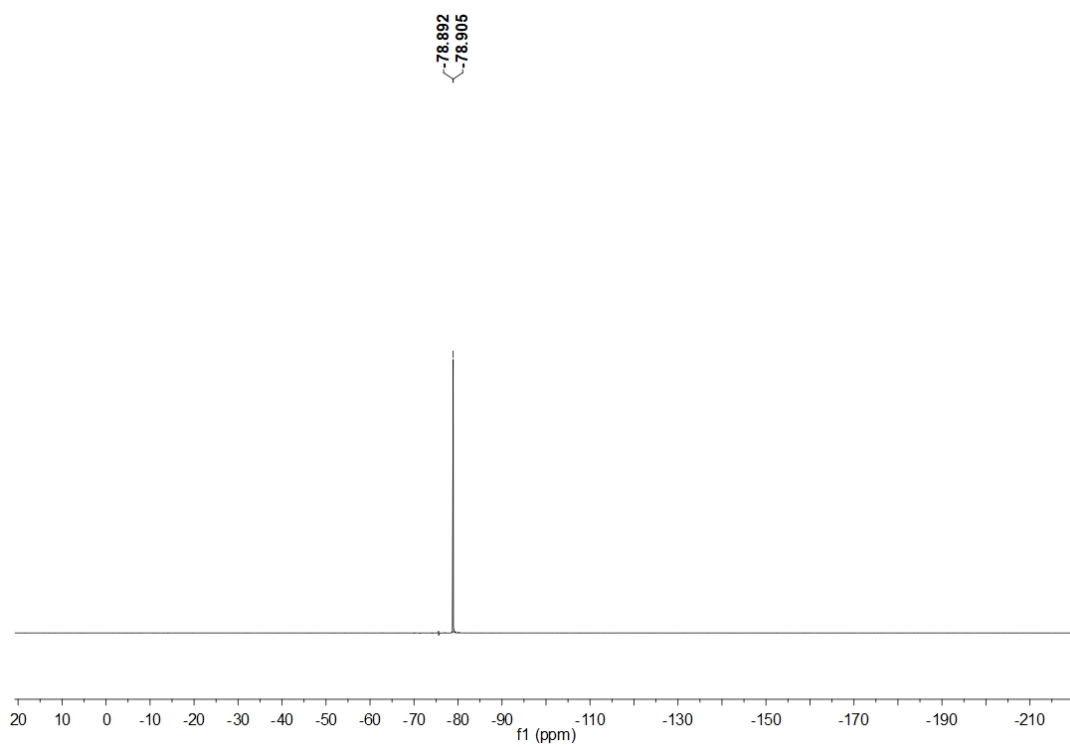

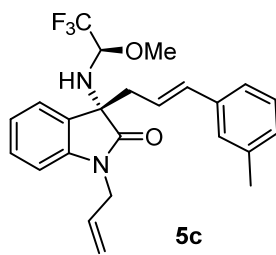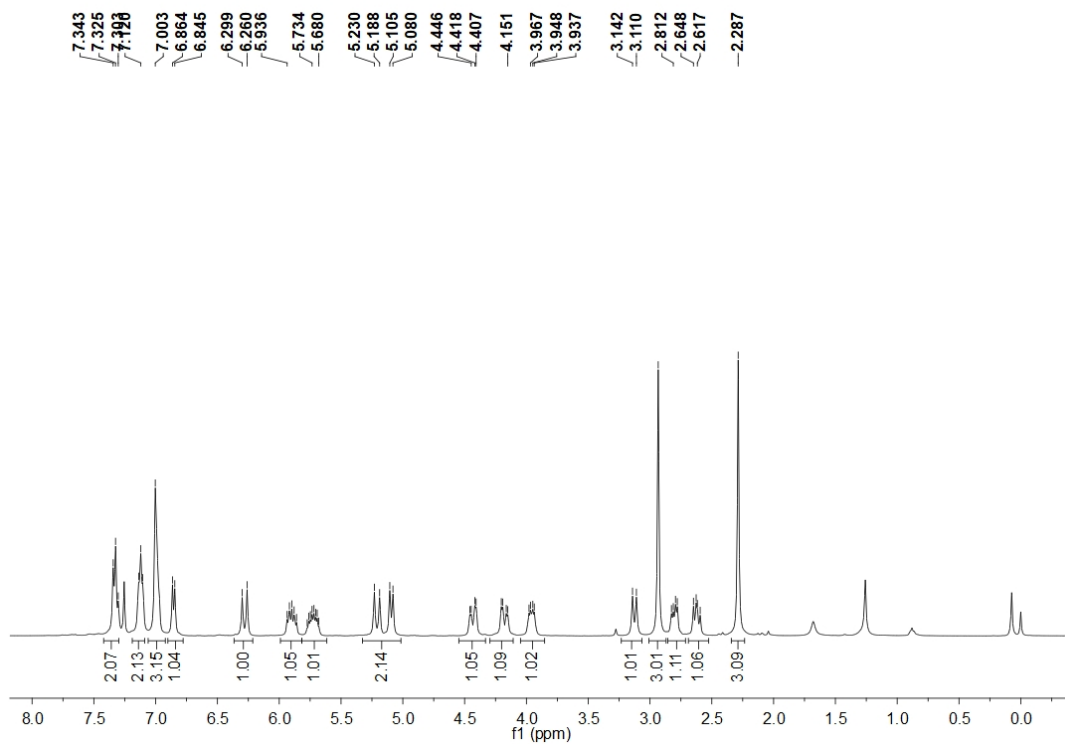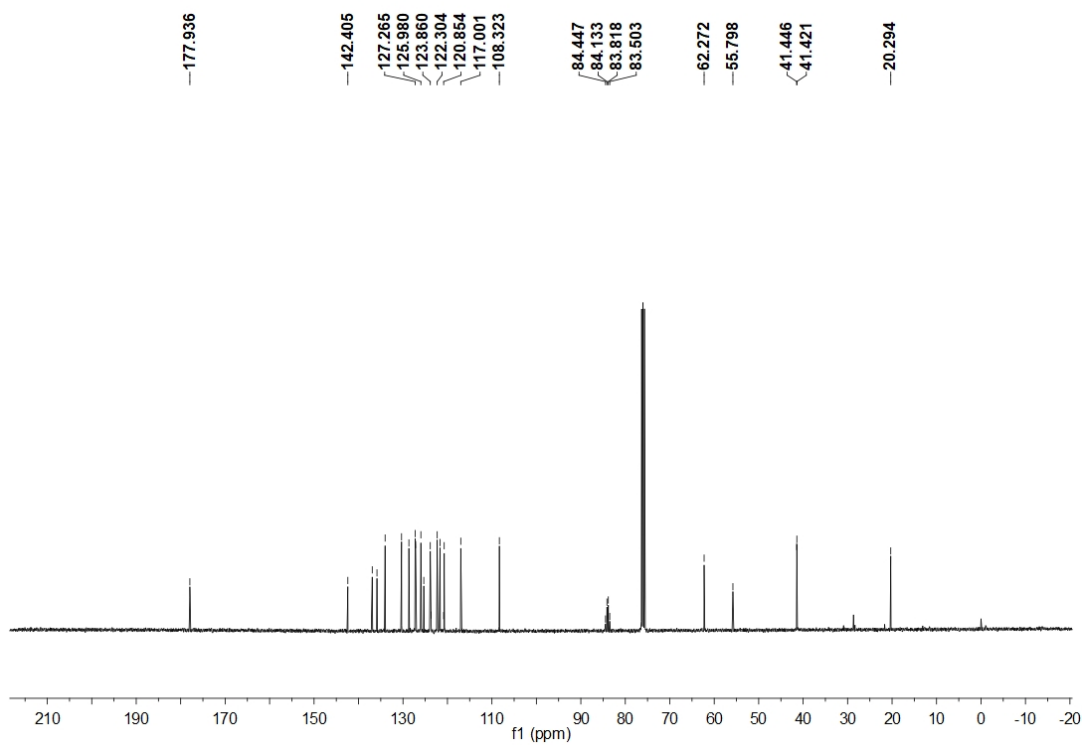

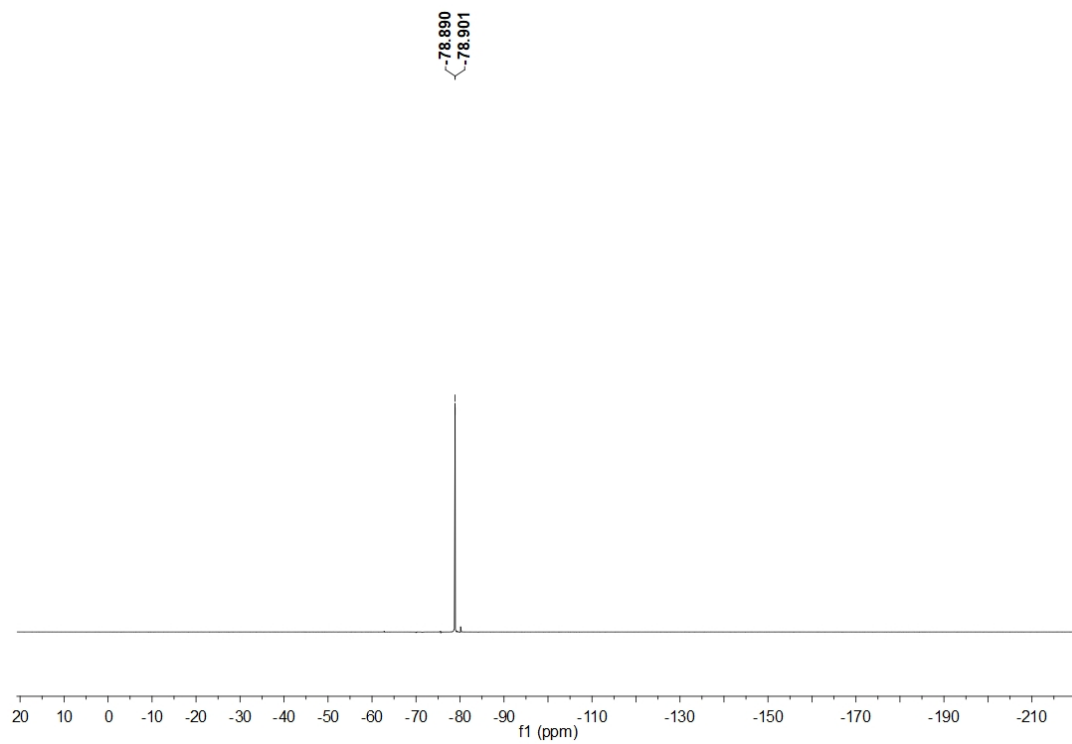

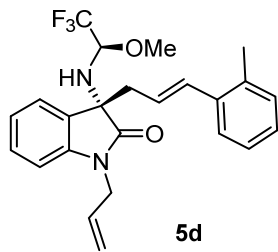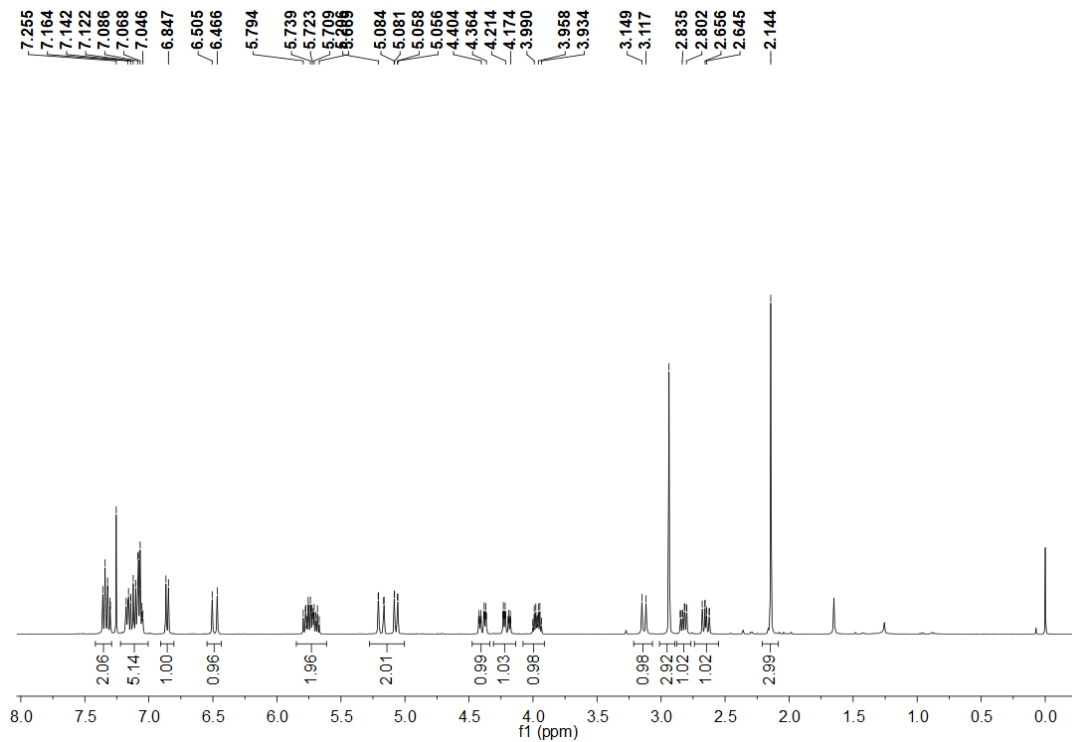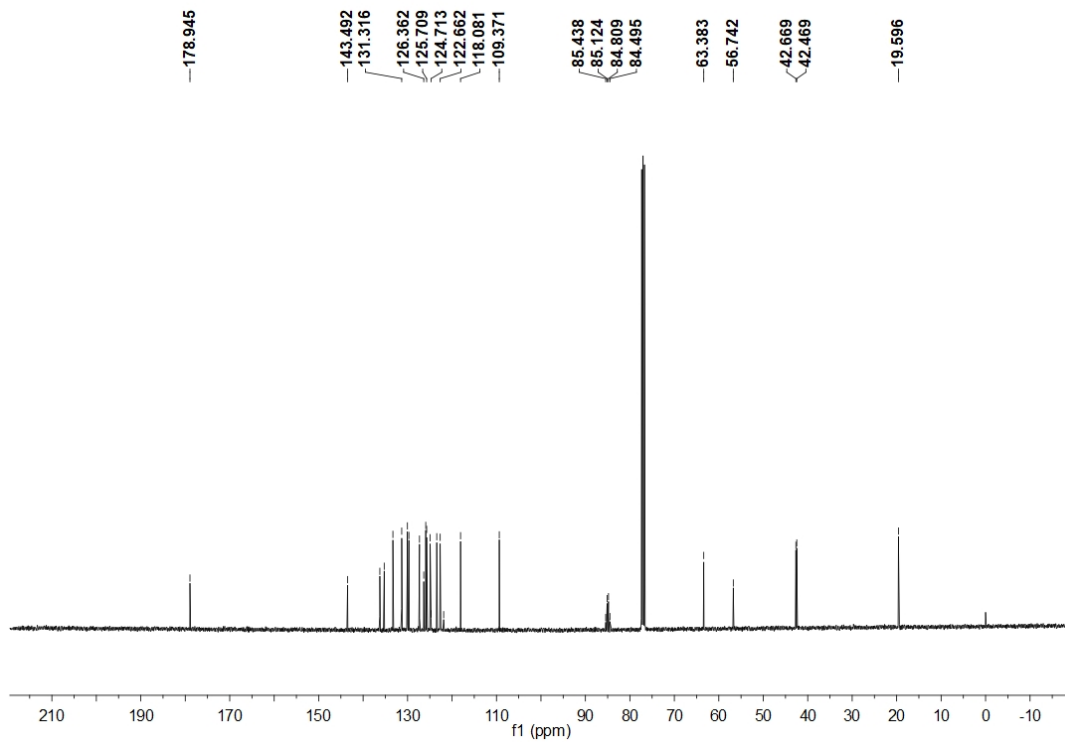

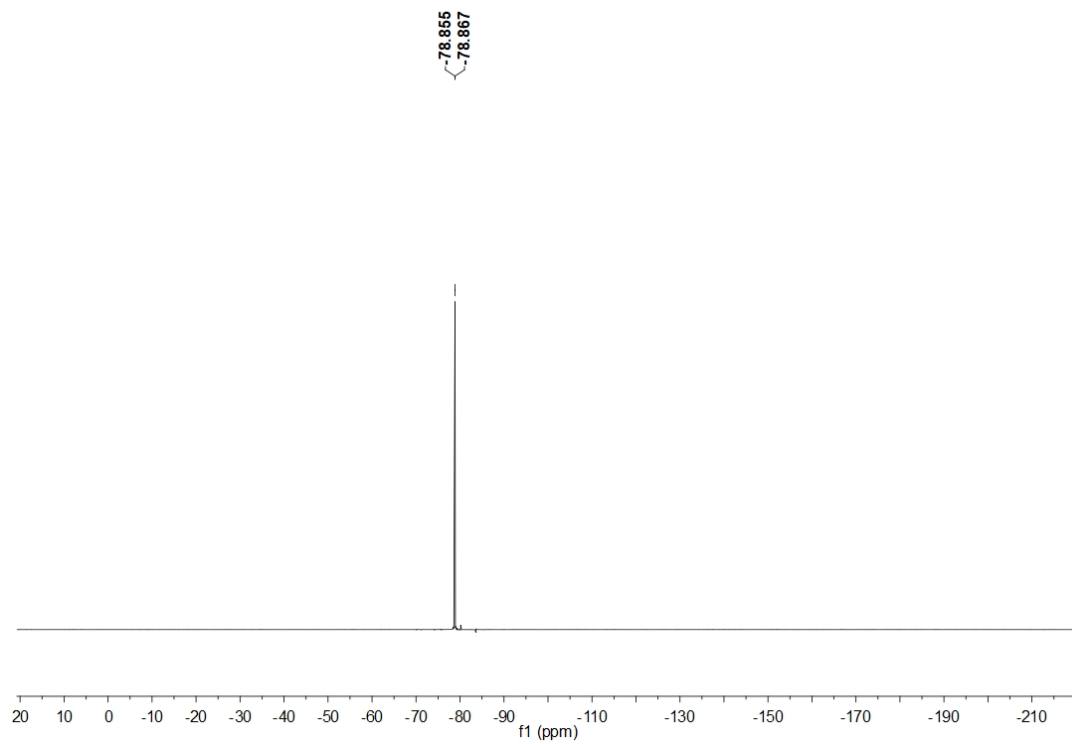

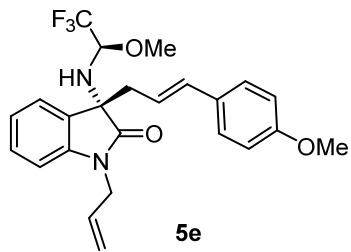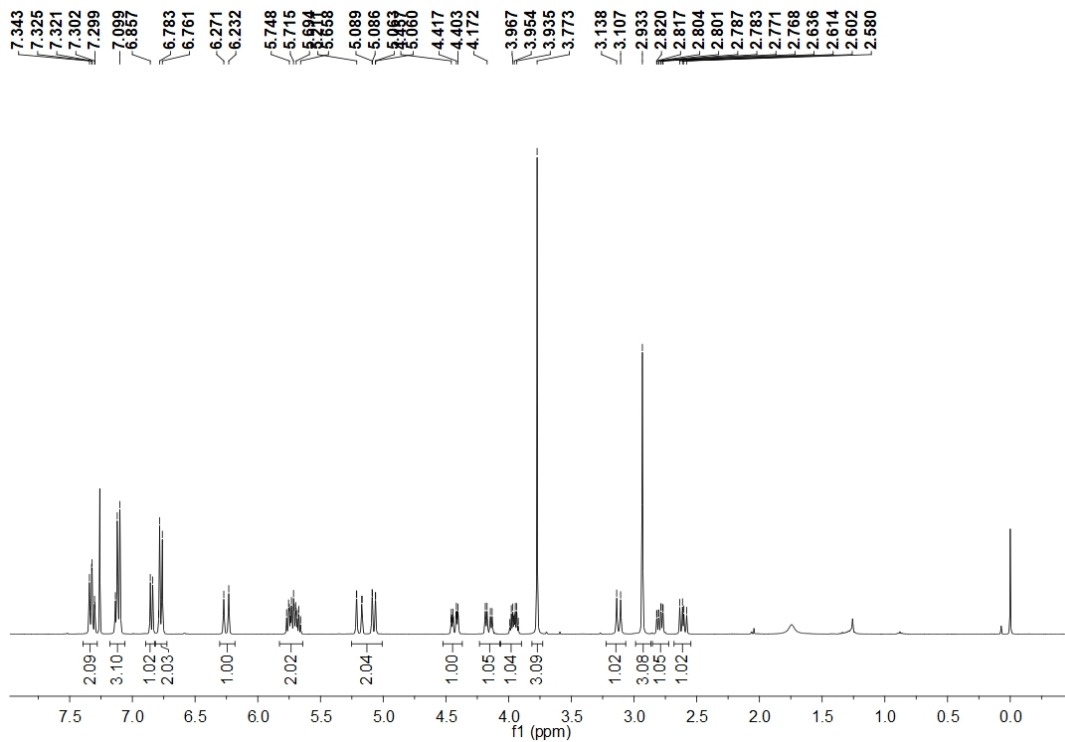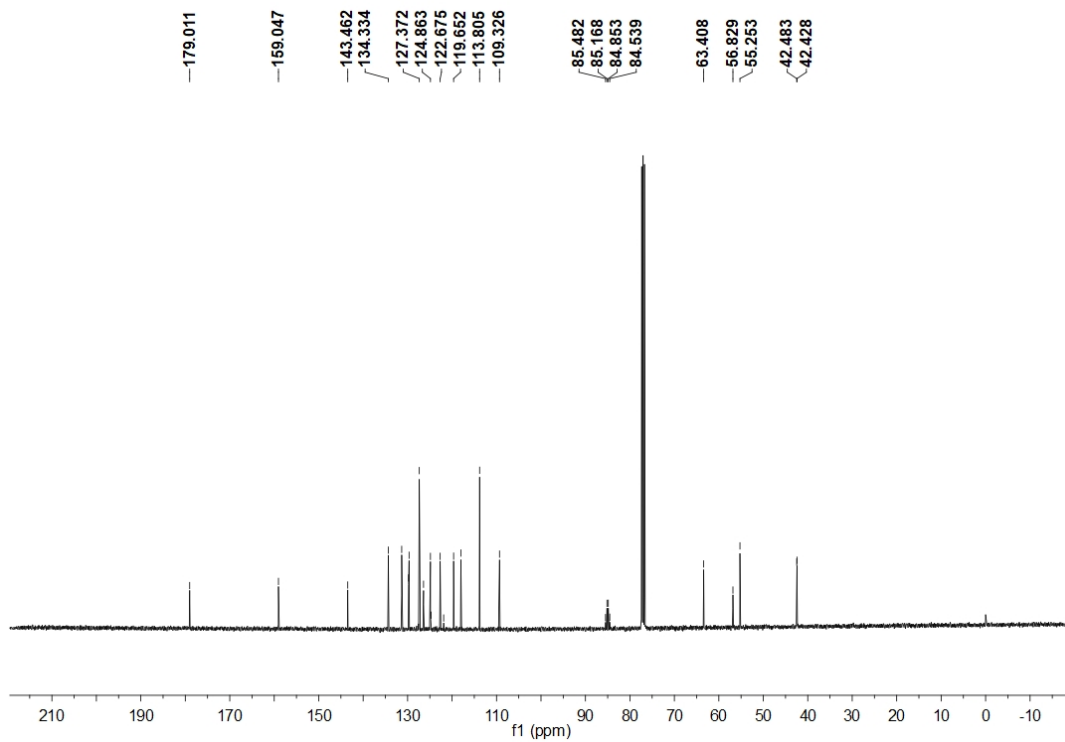



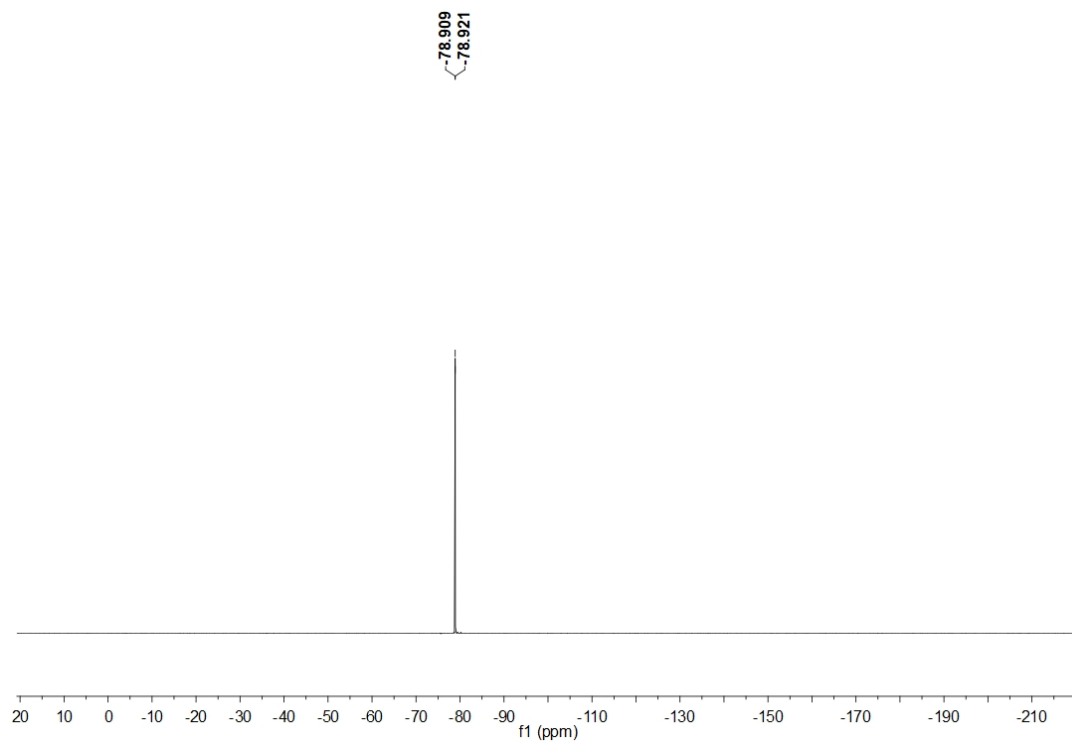

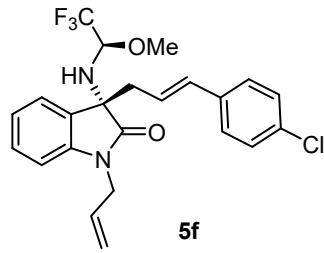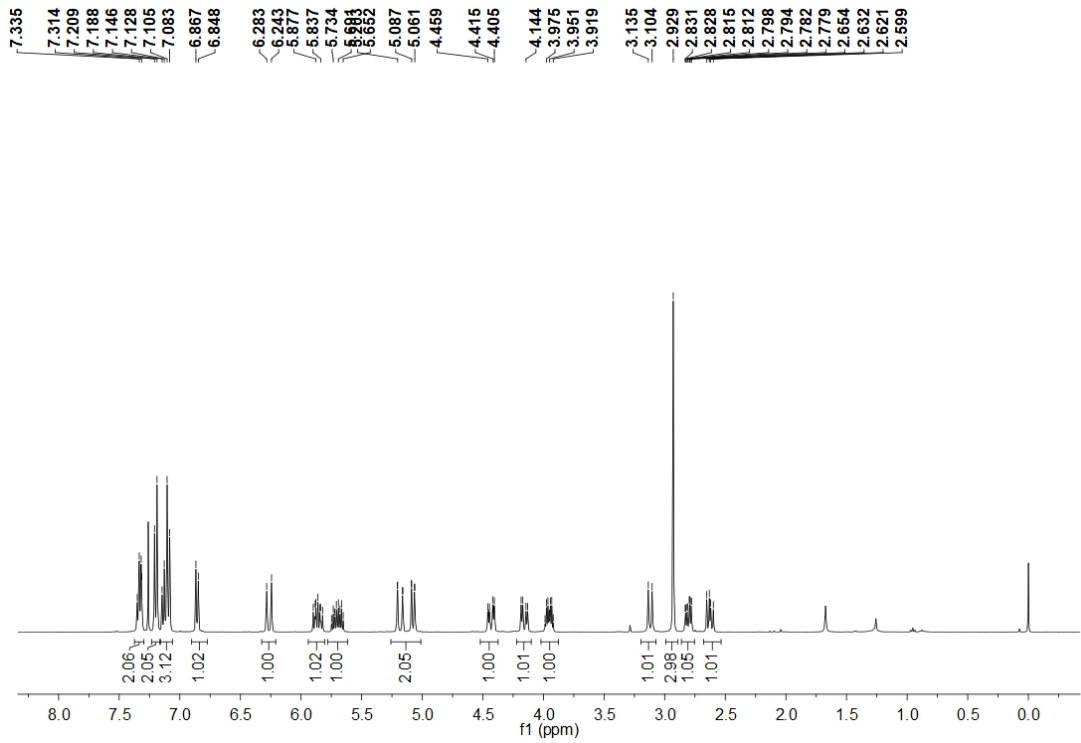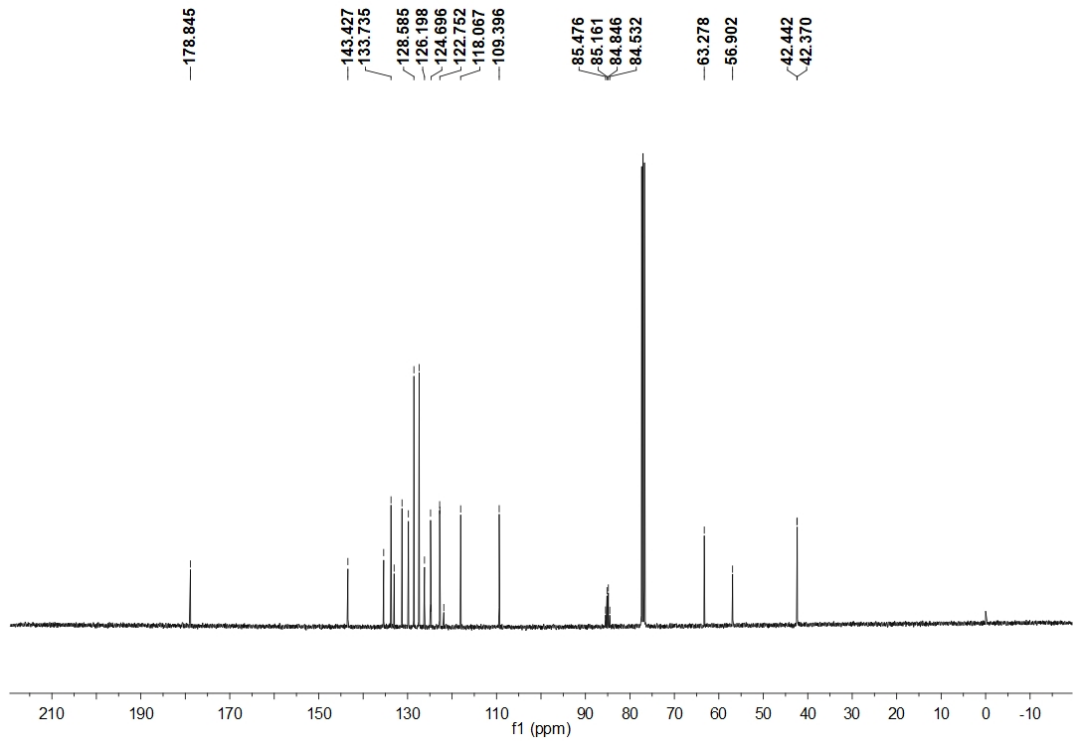

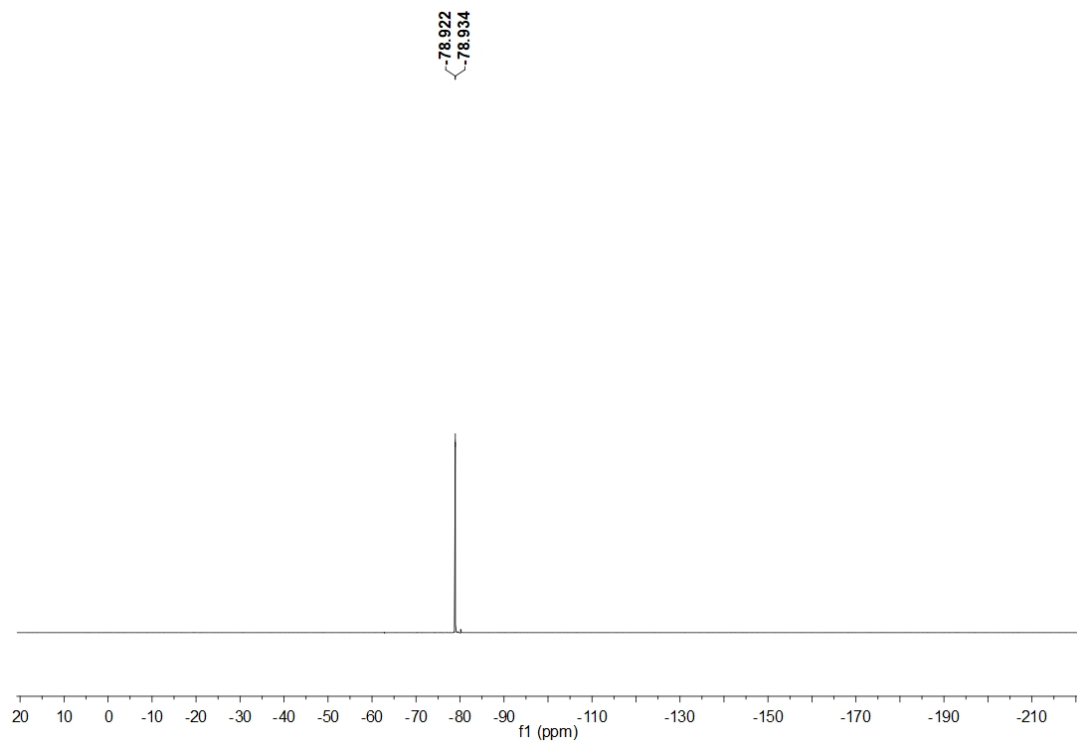

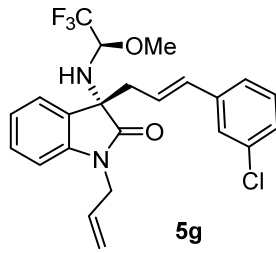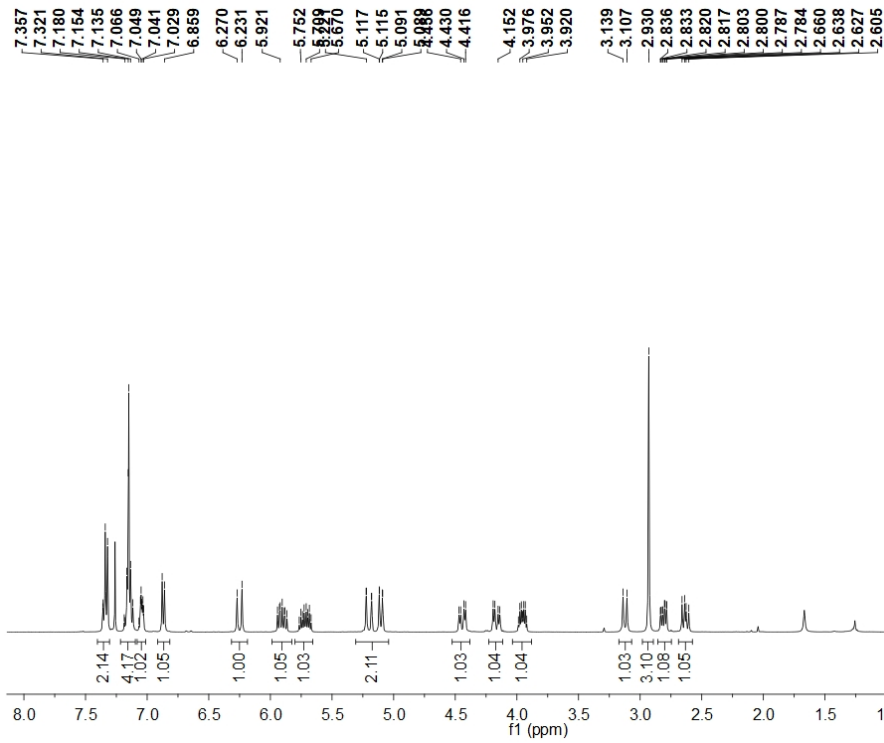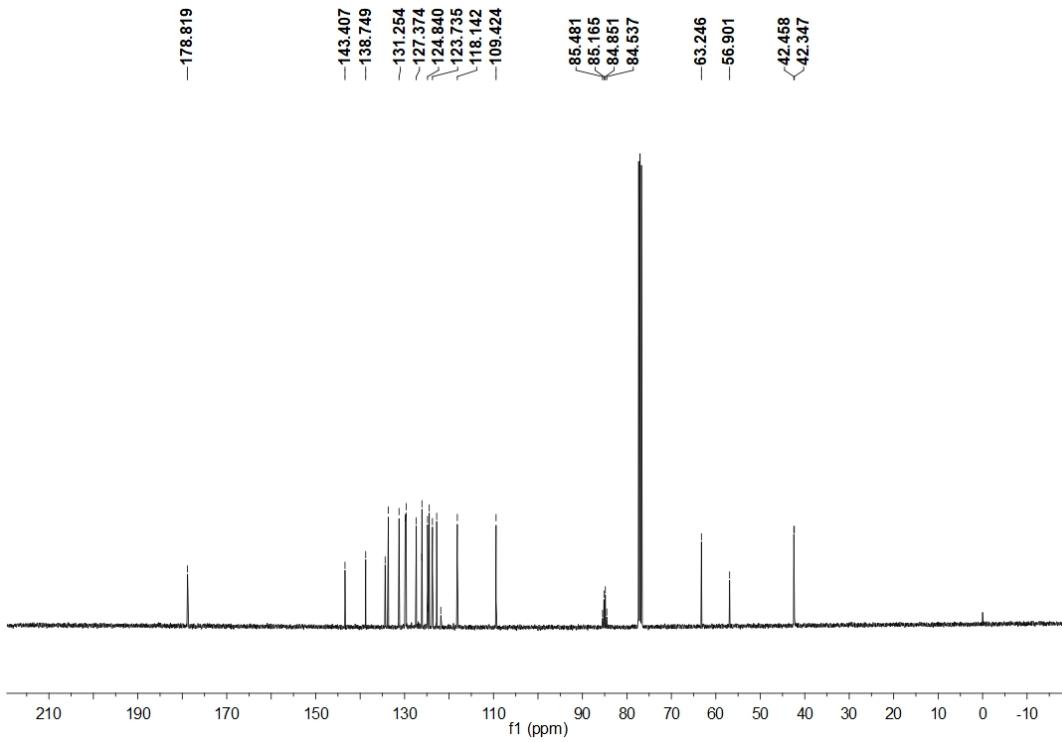

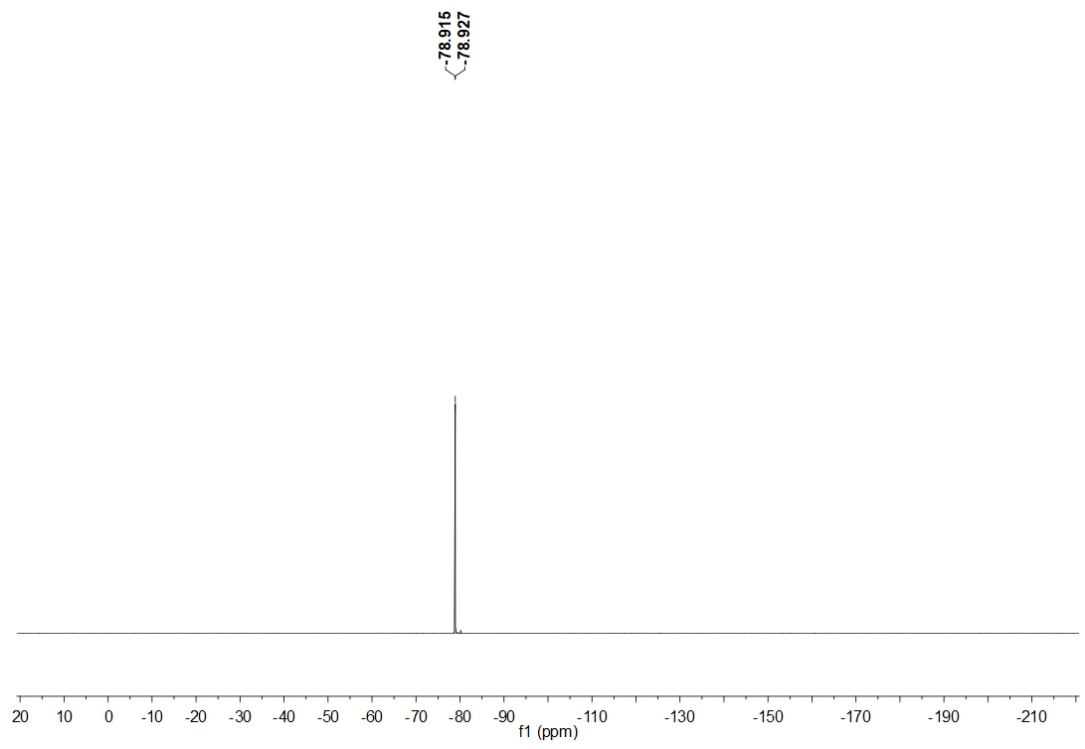

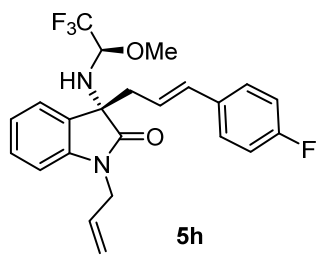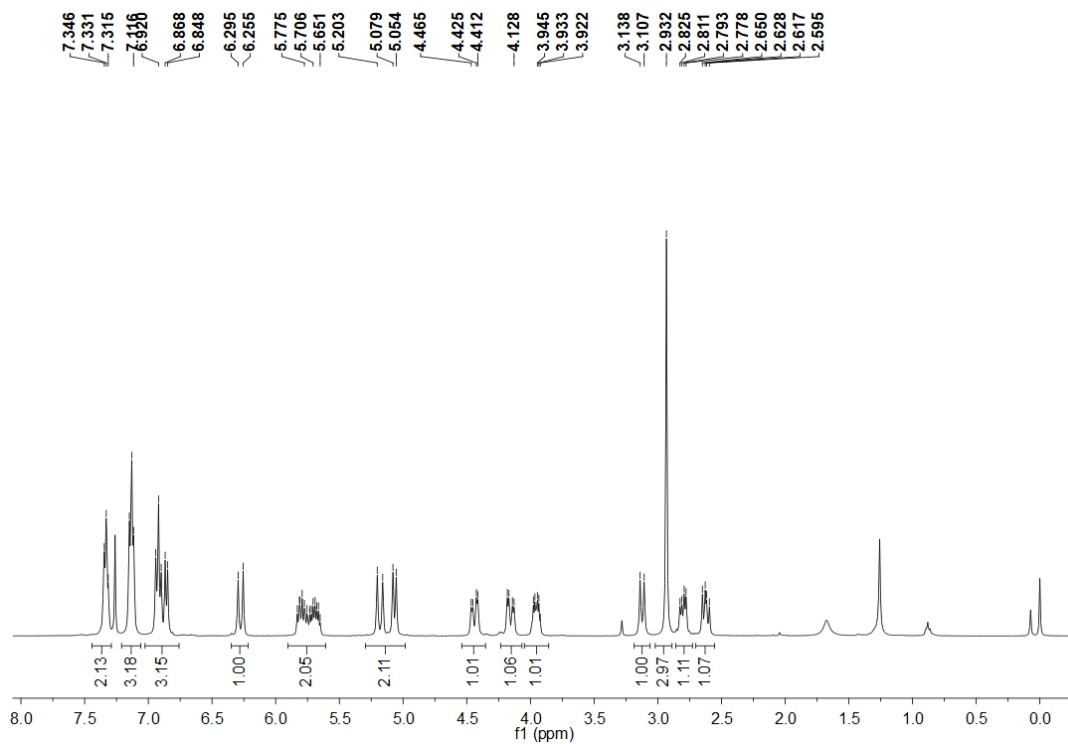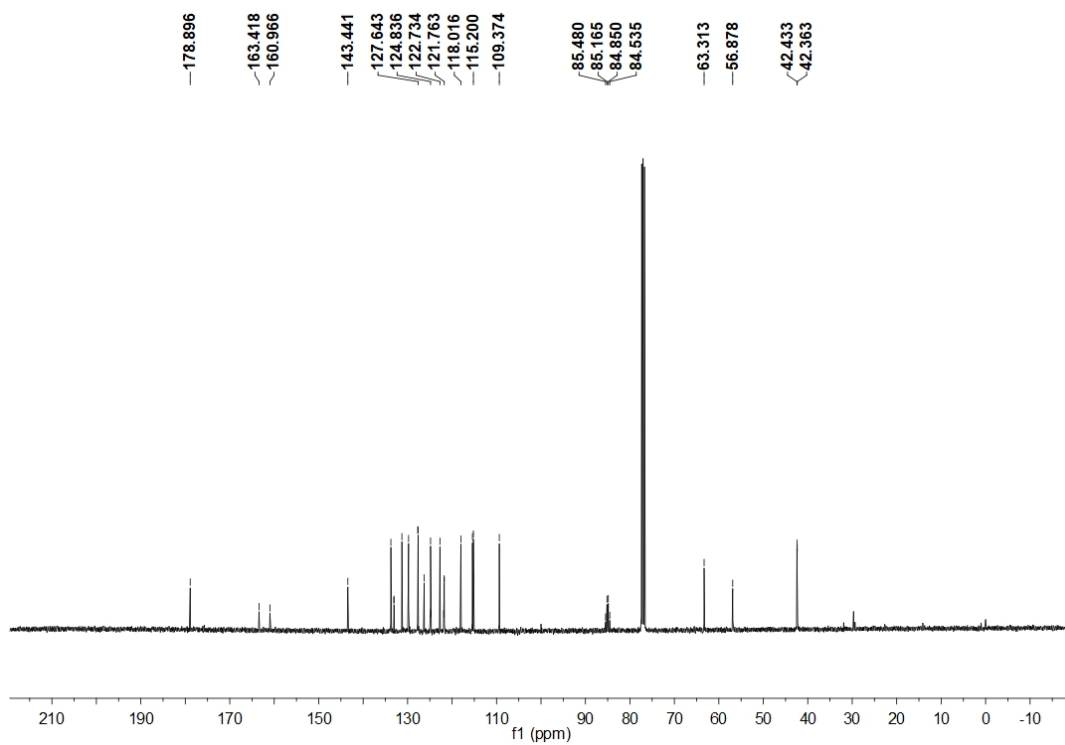

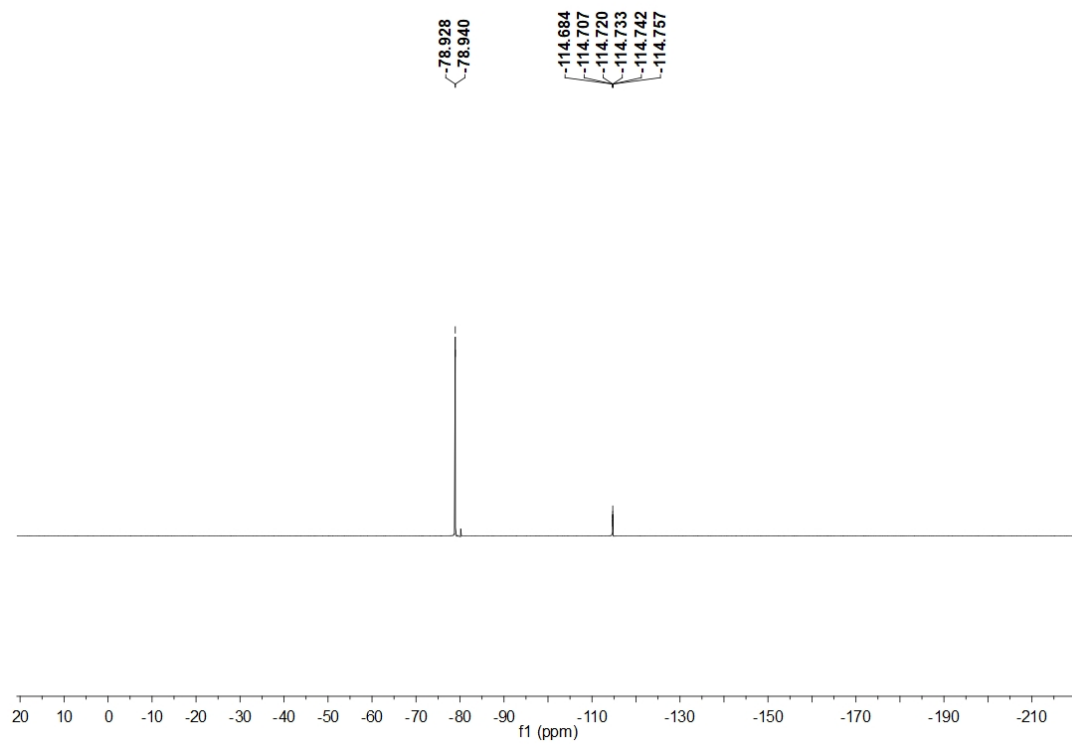

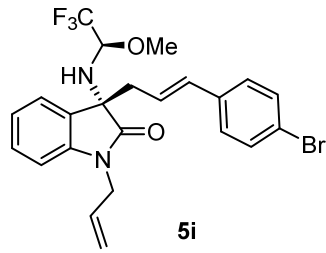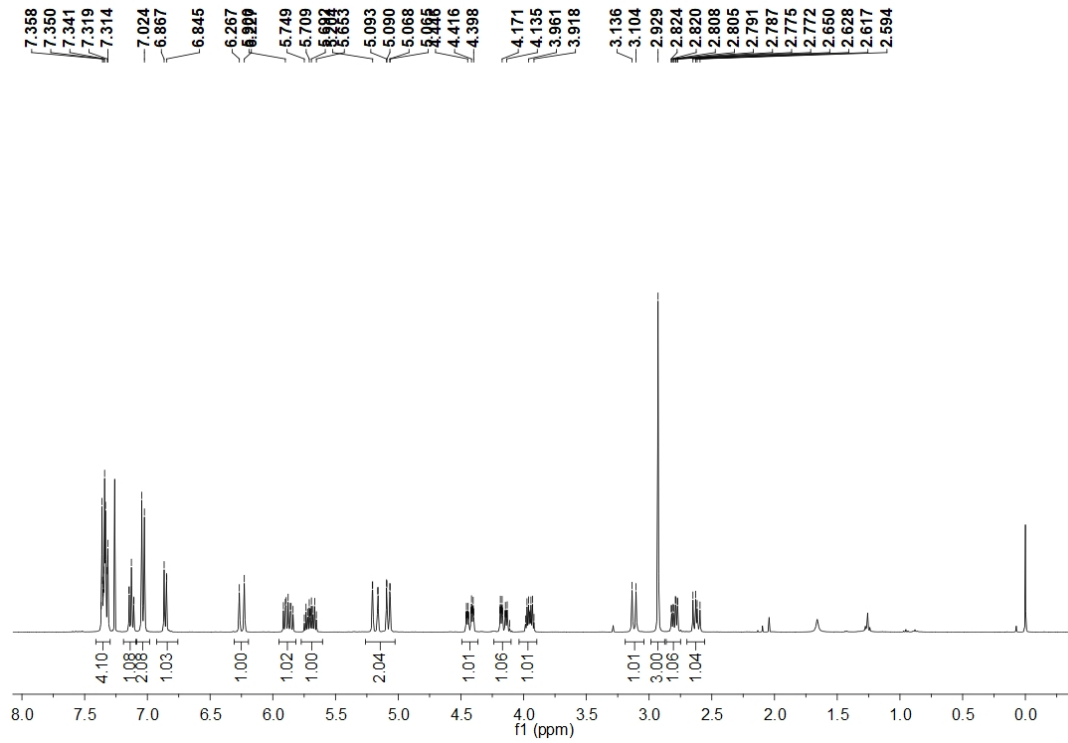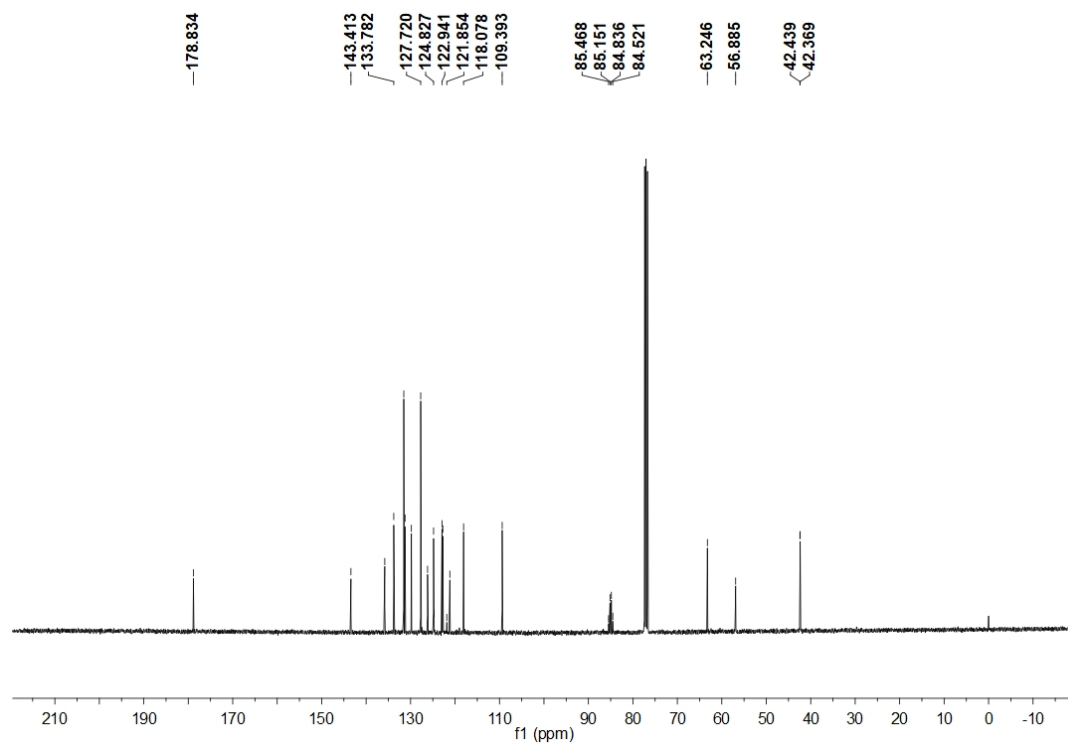



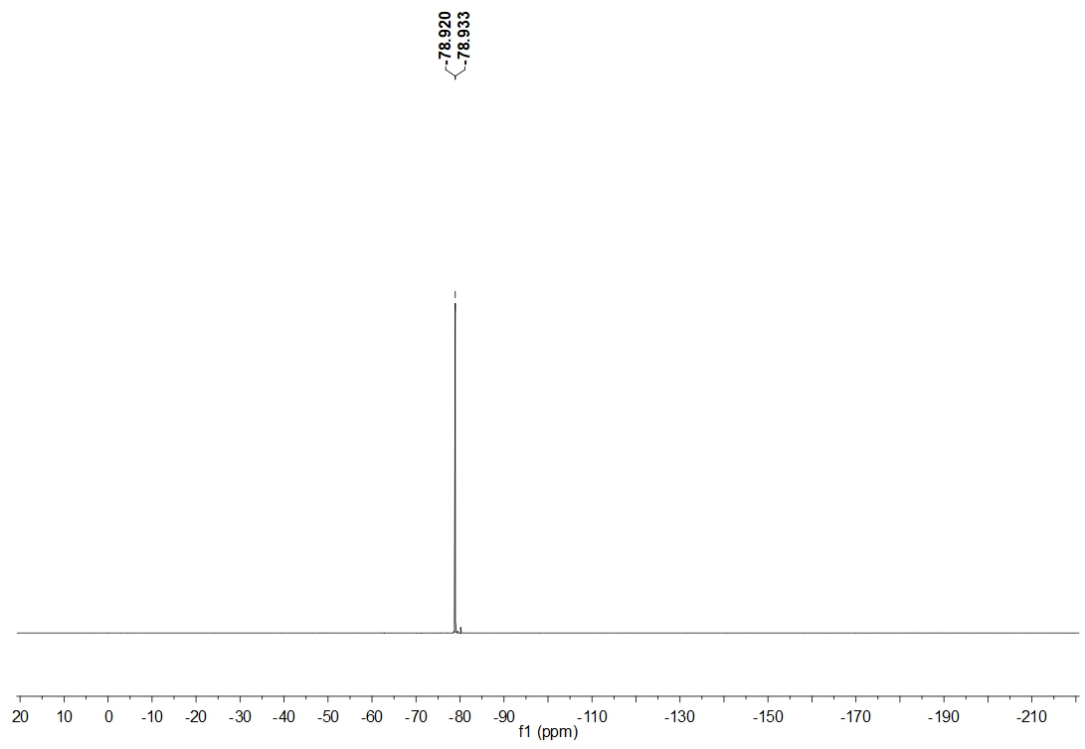

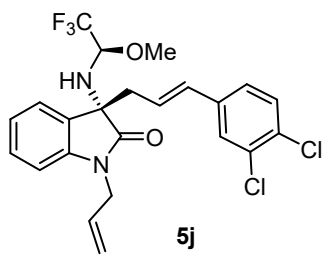

7.305  
7.284  
7.237  
7.156  
7.137  
7.118  
7.005  
6.984  
6.862  
6.234  
6.195  
5.896  
5.768  
5.725  
5.672  
5.128  
5.125  
5.102  
5.089  
4.480  
4.430  
4.413  
4.134  
3.970  
3.938  
3.914  
3.136  
3.104  
2.928  
2.829  
2.825  
2.813  
2.810  
2.796  
2.792  
2.780  
2.777  
2.660  
2.638  
2.627  
2.604

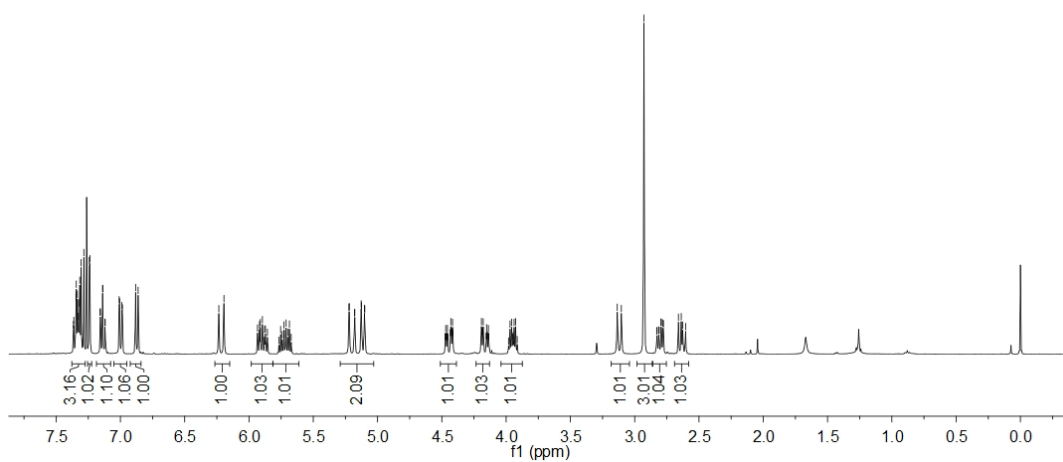

178.761  
143.382  
136.959  
131.230  
129.926  
125.394  
124.339  
118.165  
109.448  
85.477  
85.161  
84.846  
84.530  
63.193  
56.936  
42.459  
42.306

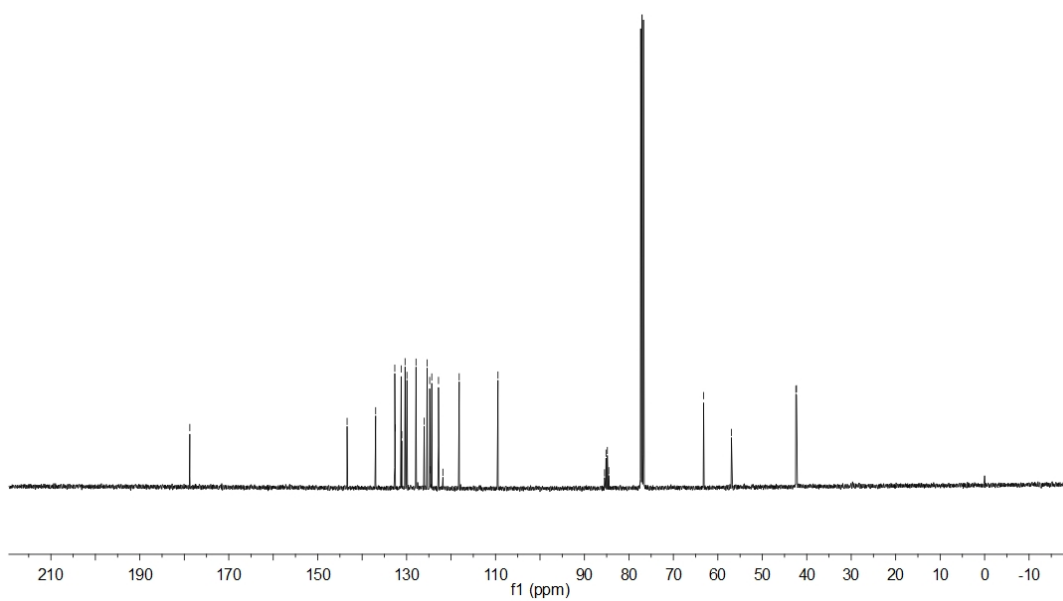

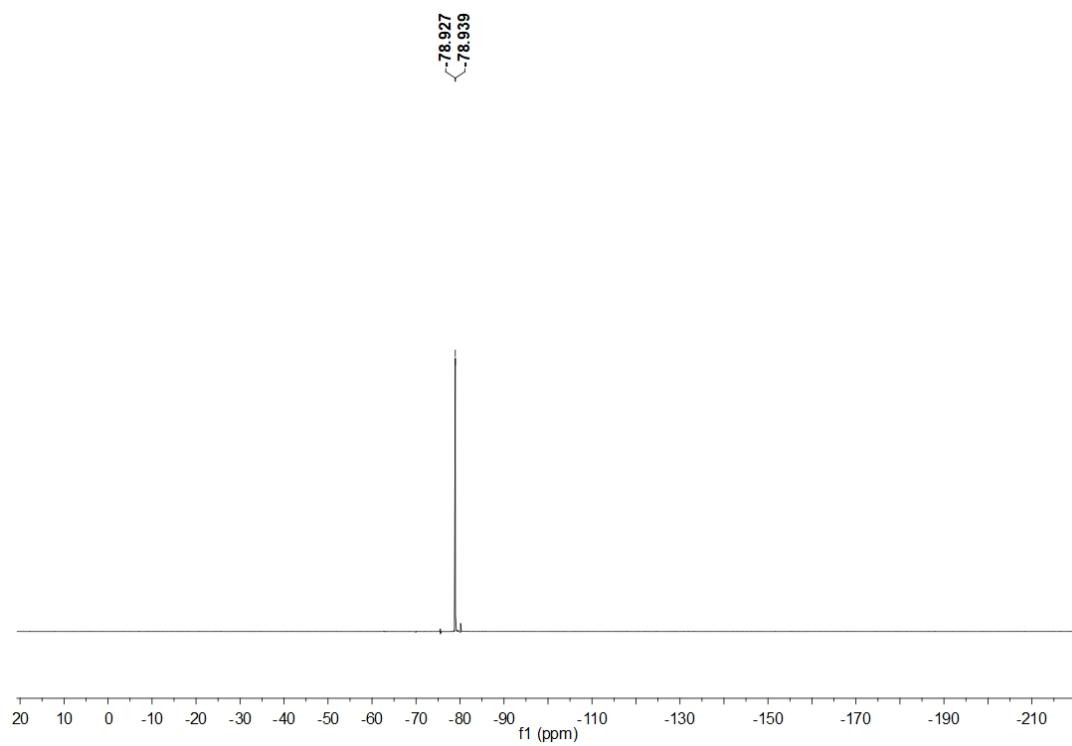

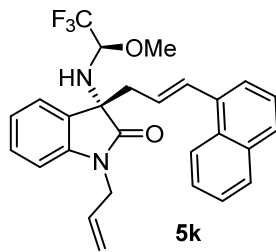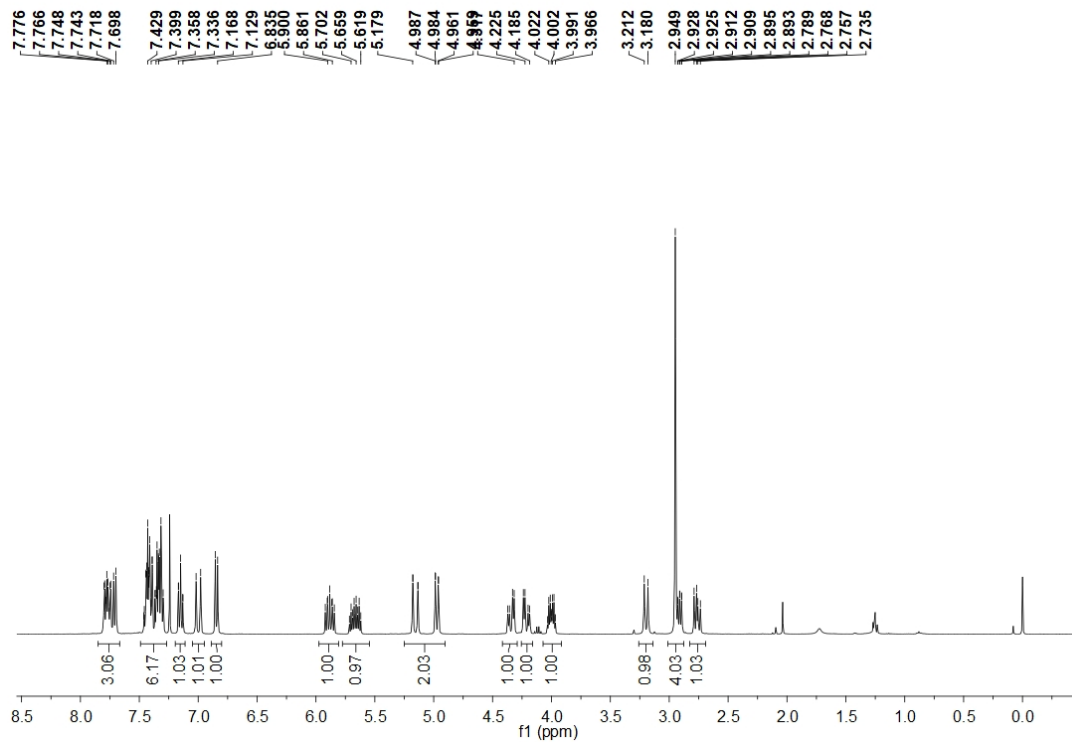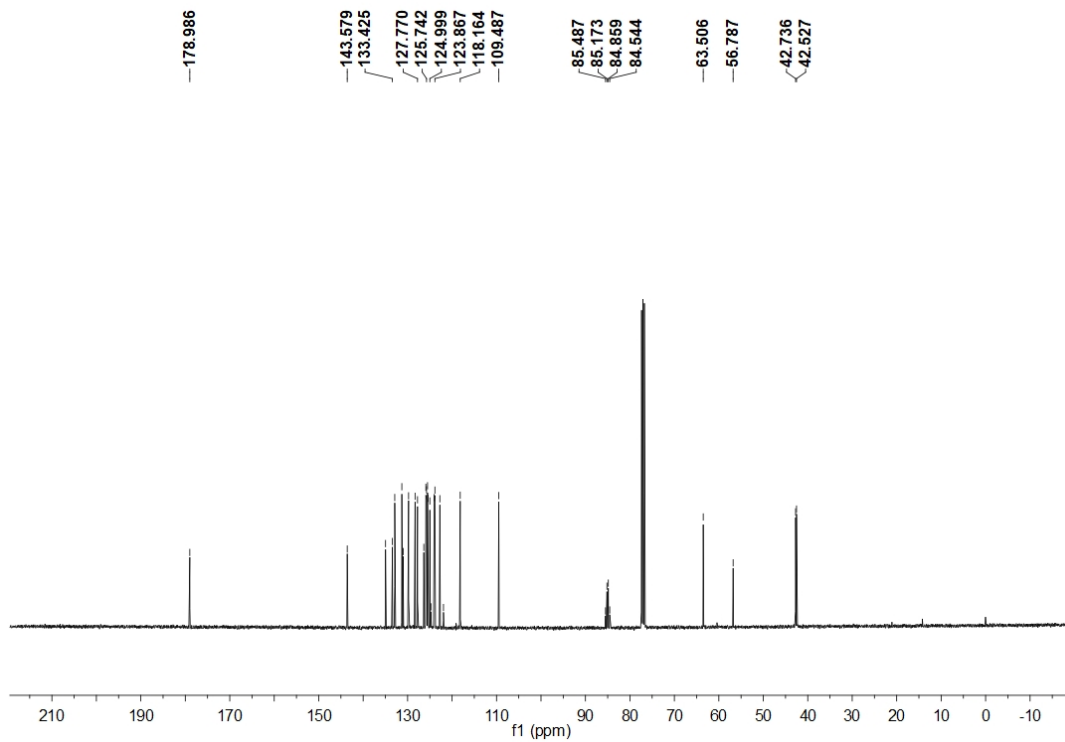

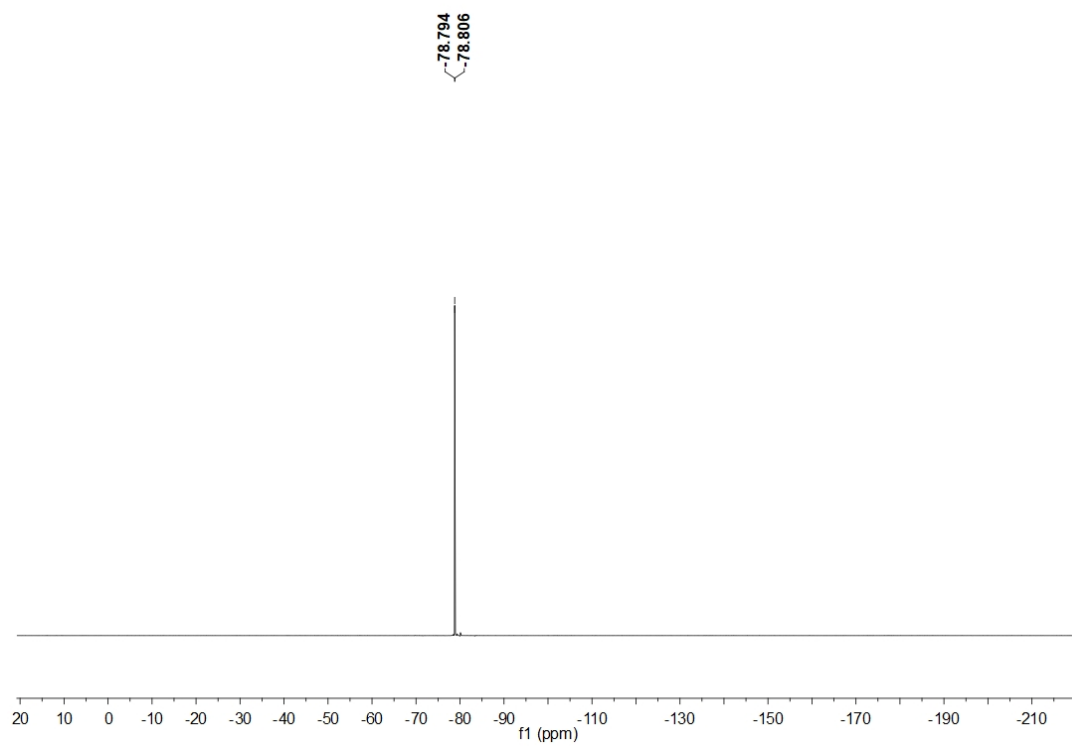

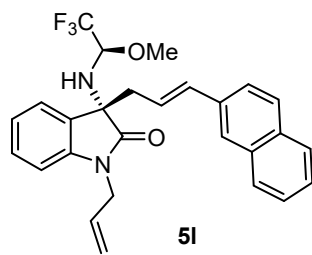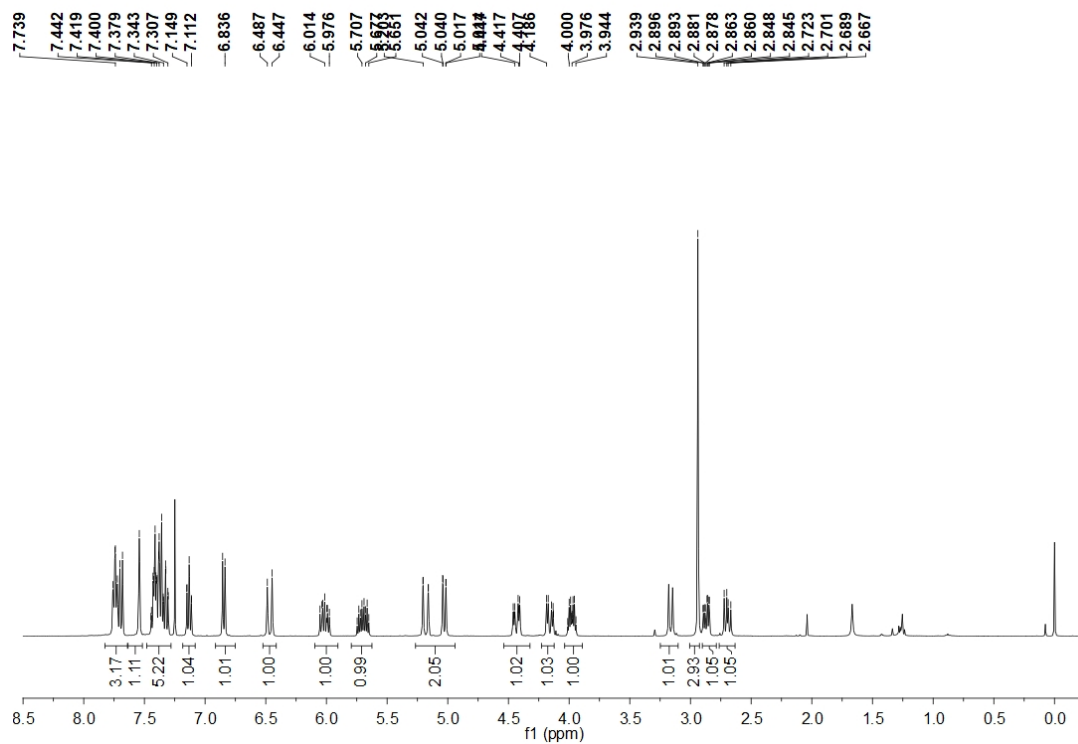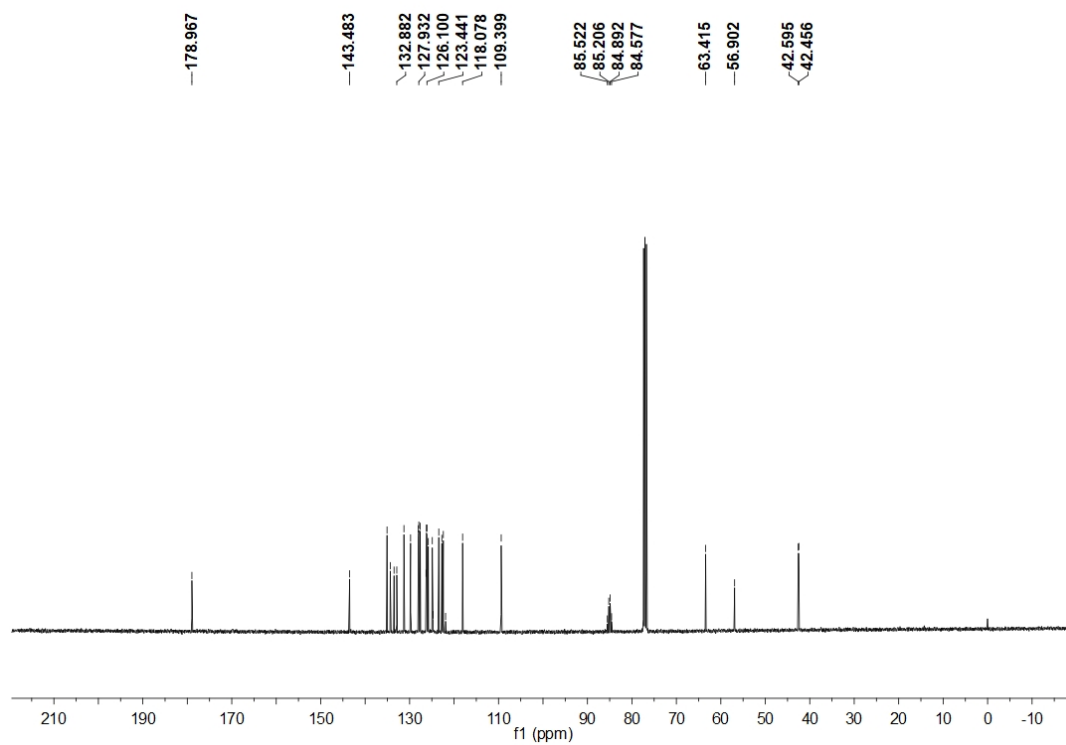

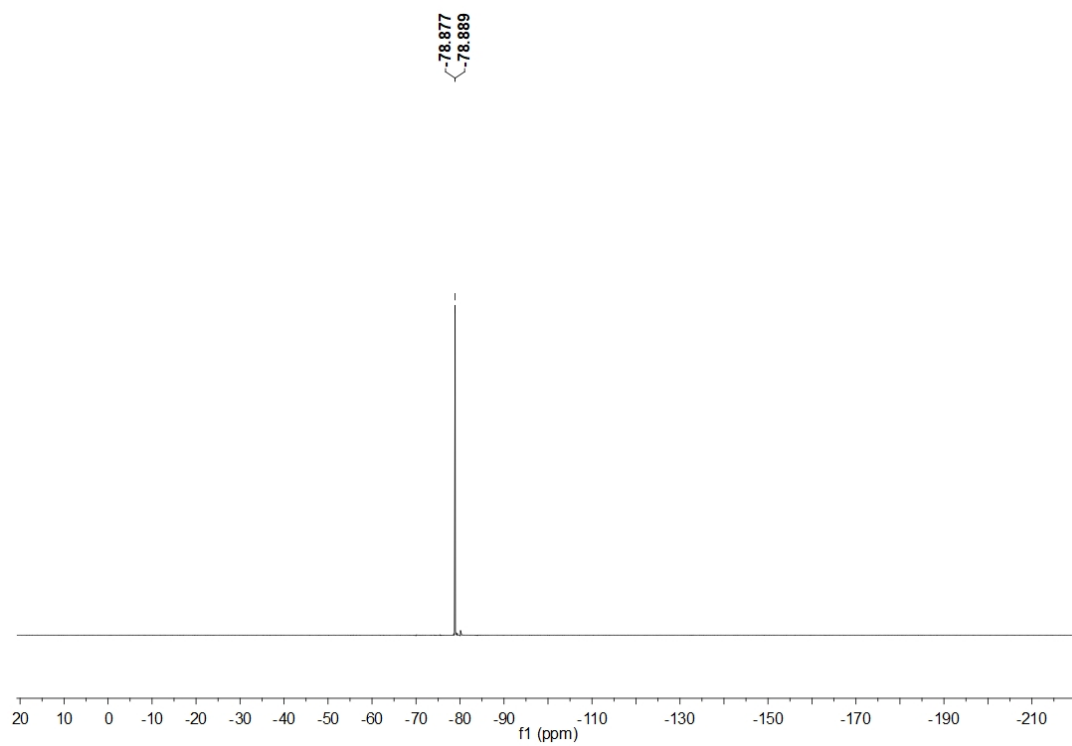

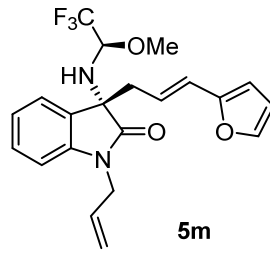

7.530  
7.308  
7.240  
7.143  
7.107  
6.867  
6.847  
6.291  
6.283  
6.111  
6.074  
5.761  
5.679  
5.208  
5.098  
5.095  
5.072  
4.979  
4.969  
4.457  
4.440  
4.155  
3.969  
3.949  
3.937  
3.913  
3.117  
3.096  
2.777  
2.616  
2.594  
2.583  
2.561

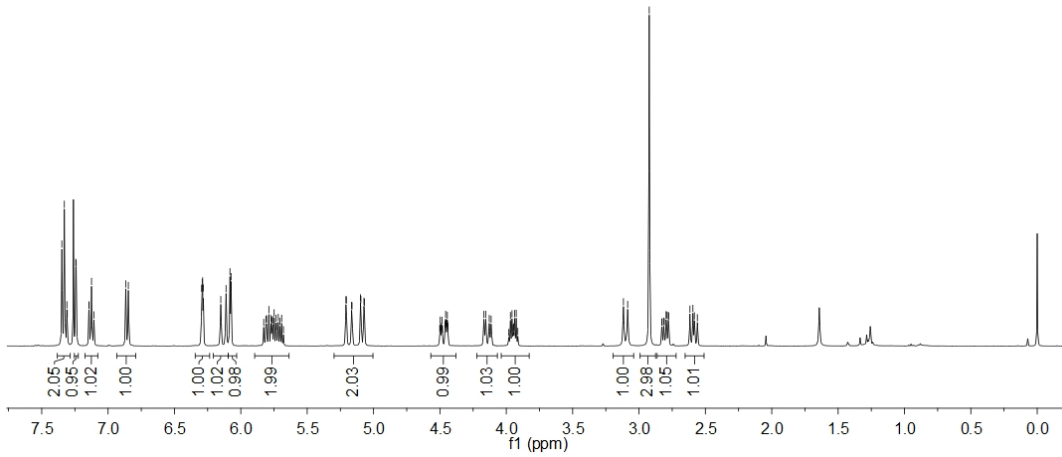

178.901  
152.371  
143.499  
141.715  
129.756  
124.833  
123.234  
121.874  
117.841  
111.080  
109.427  
107.470  
85.483  
85.168  
84.854  
84.539  
63.285  
56.875  
42.389  
42.320

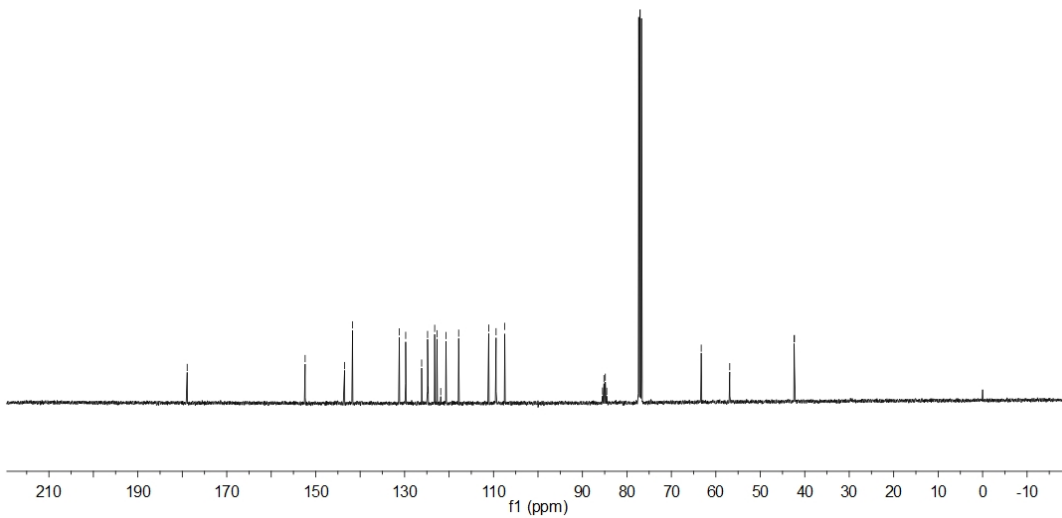



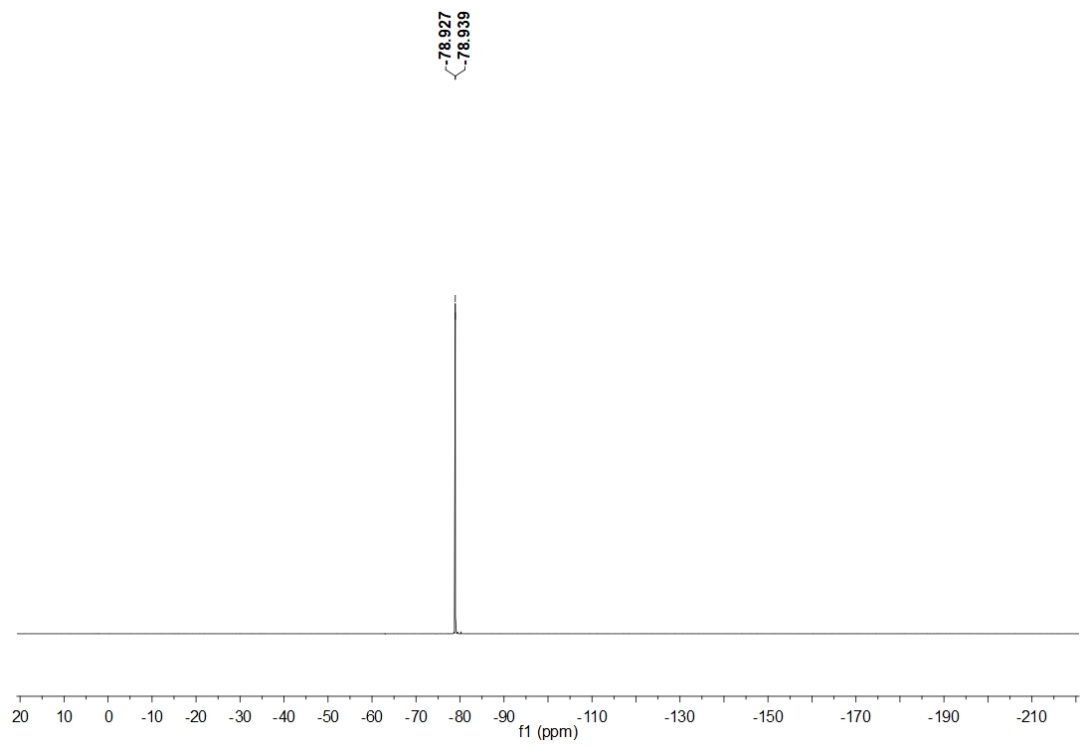

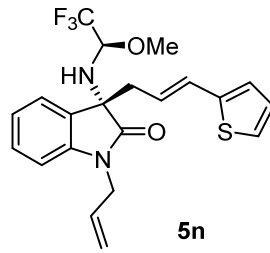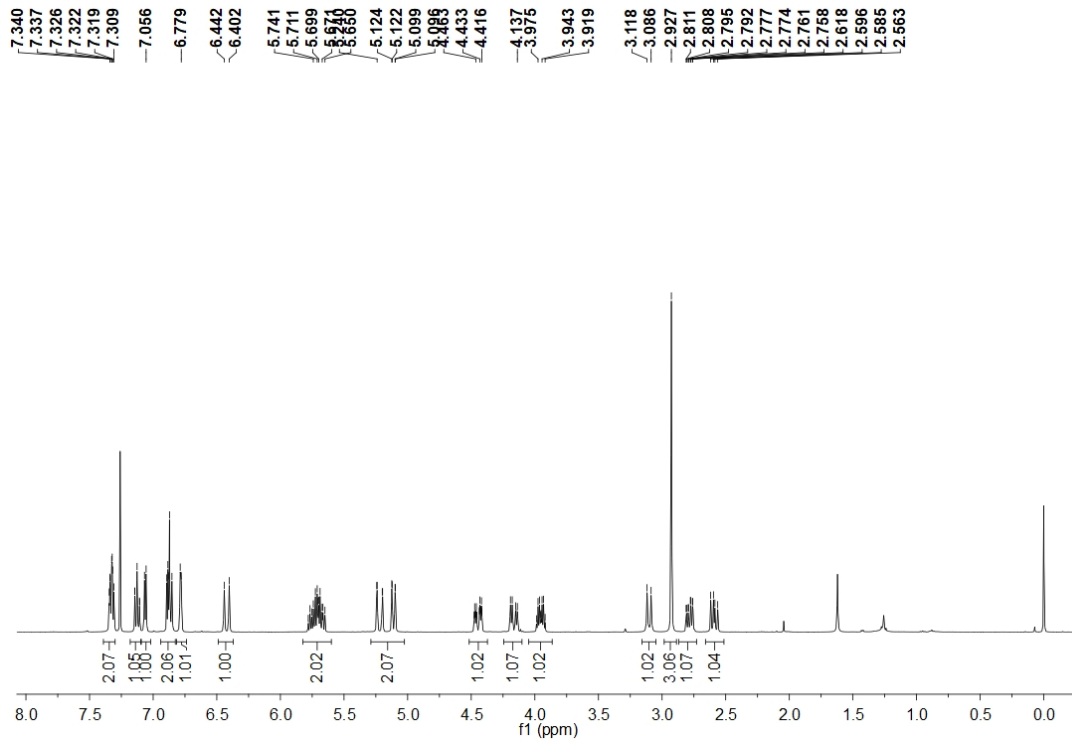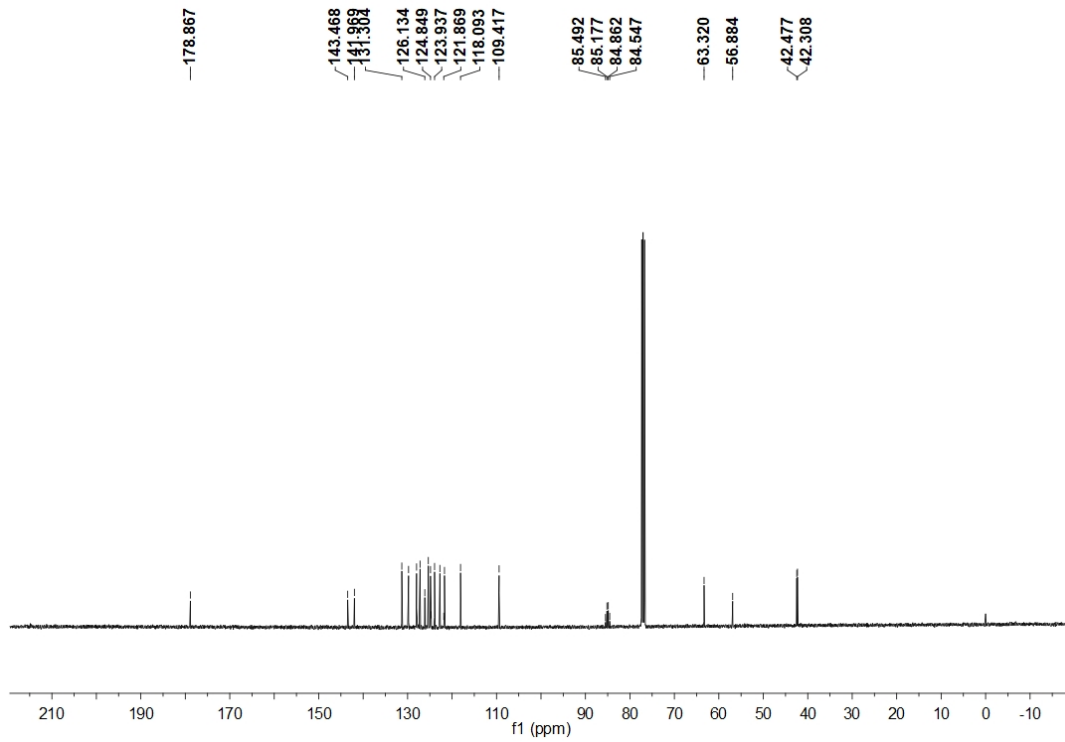

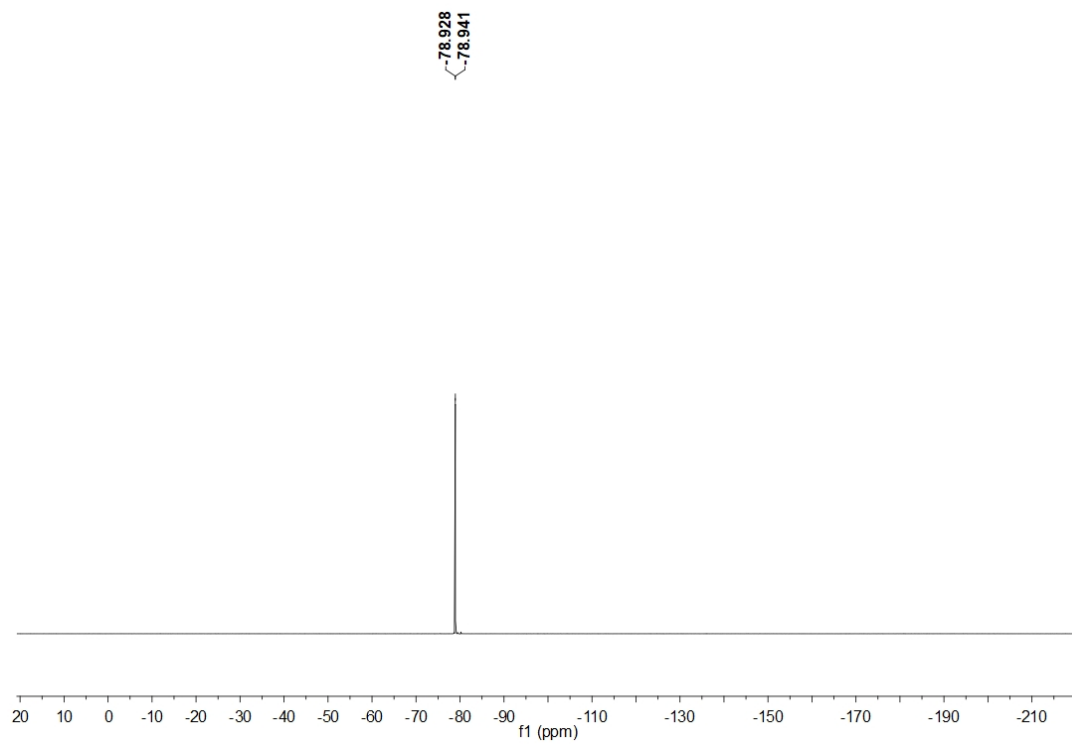



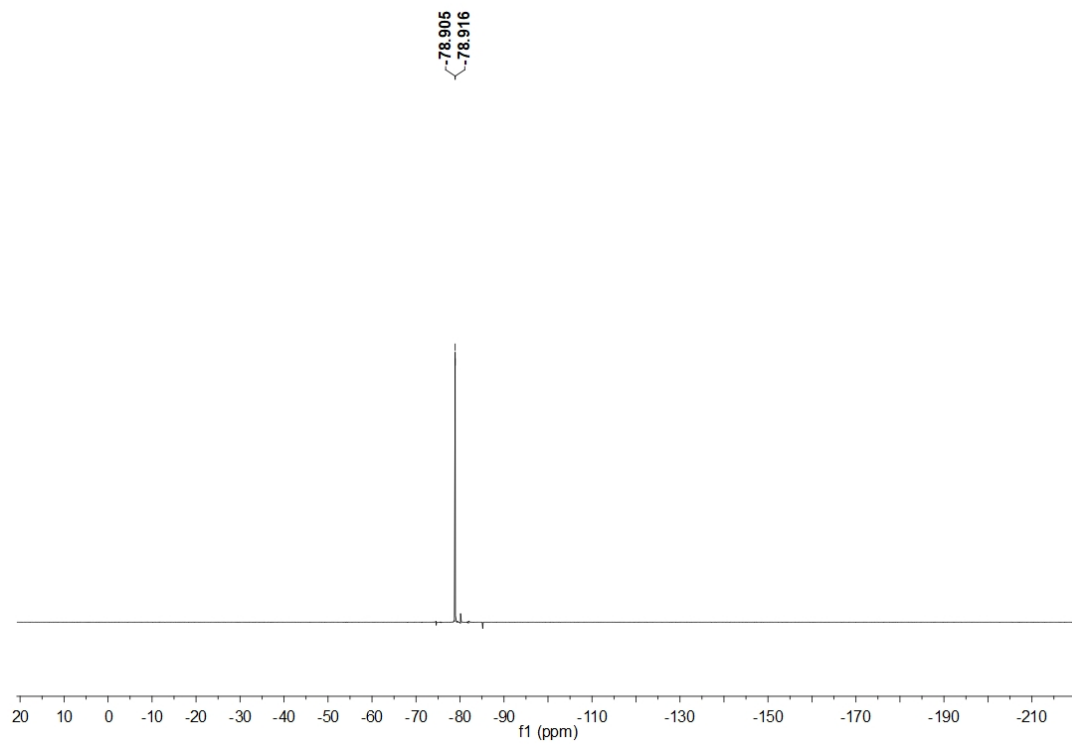



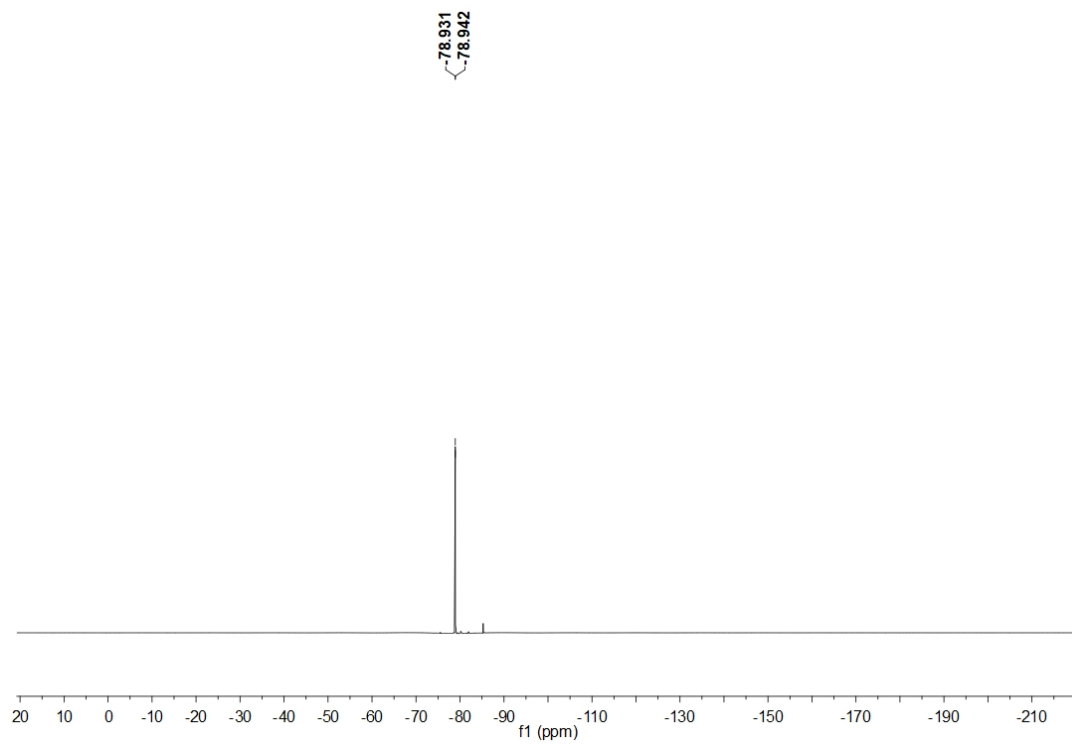

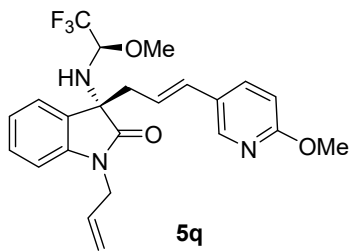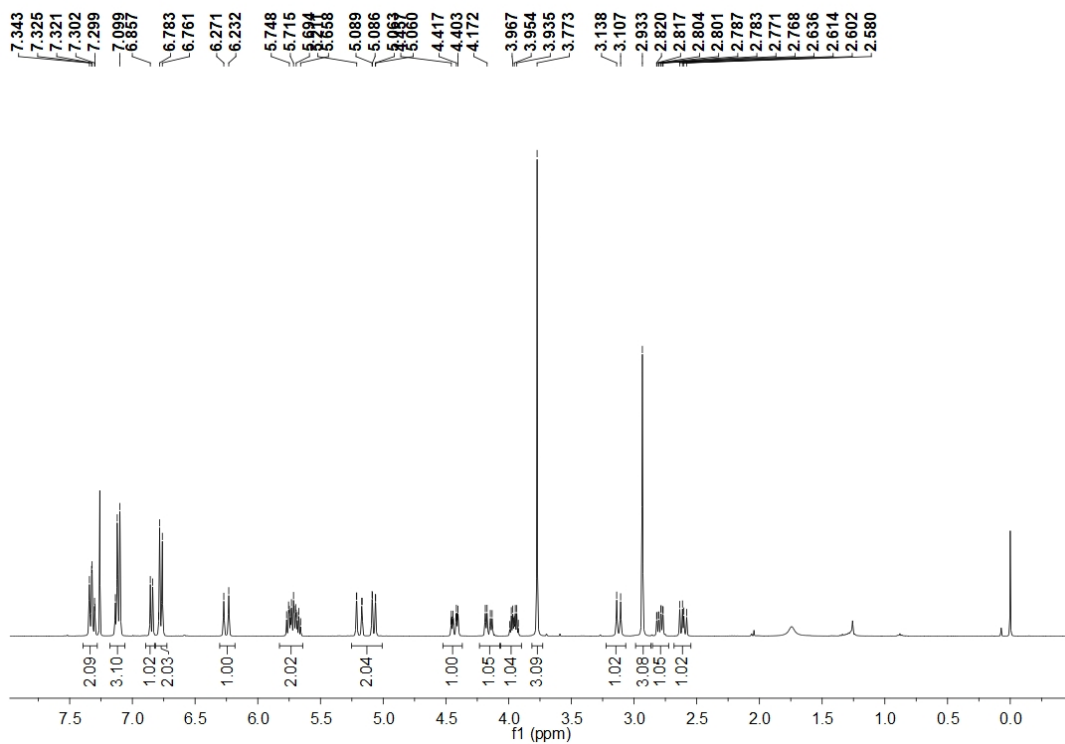





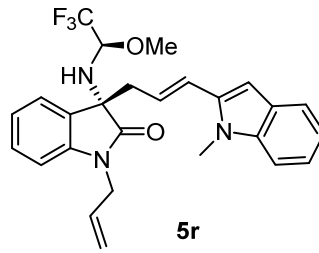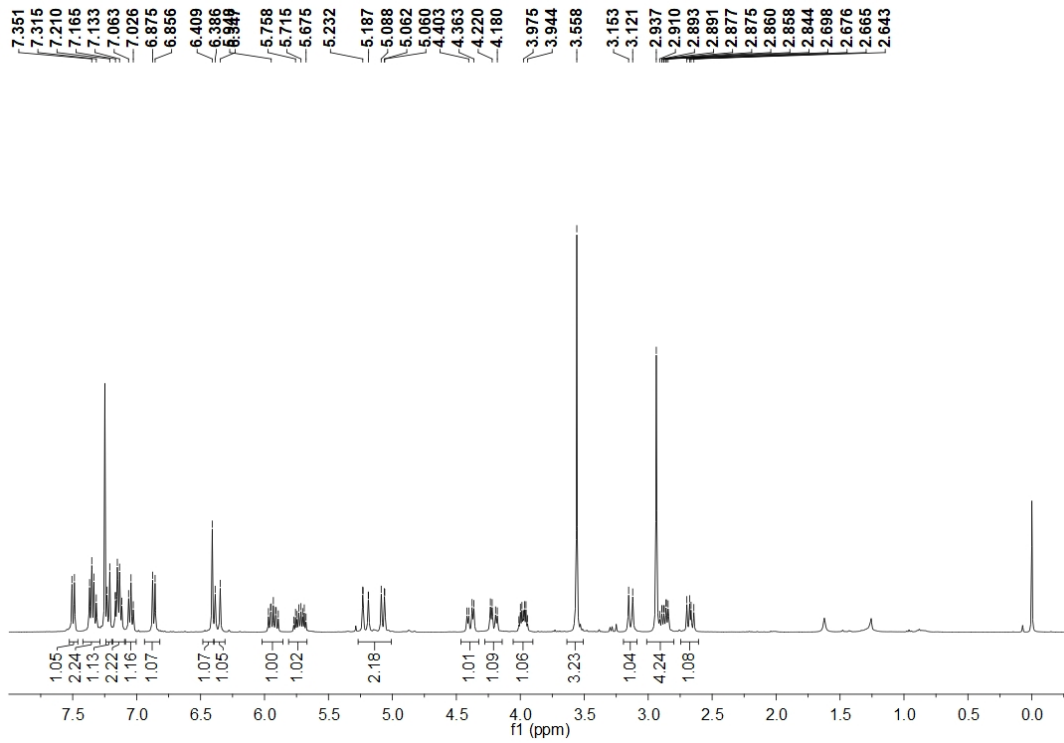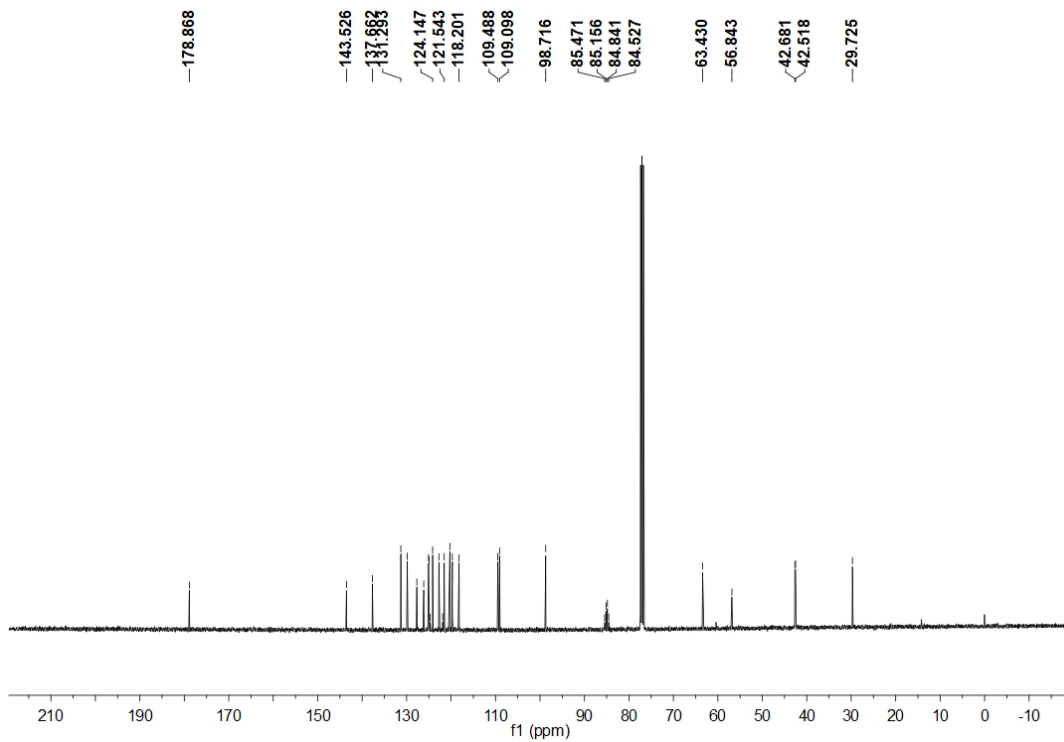

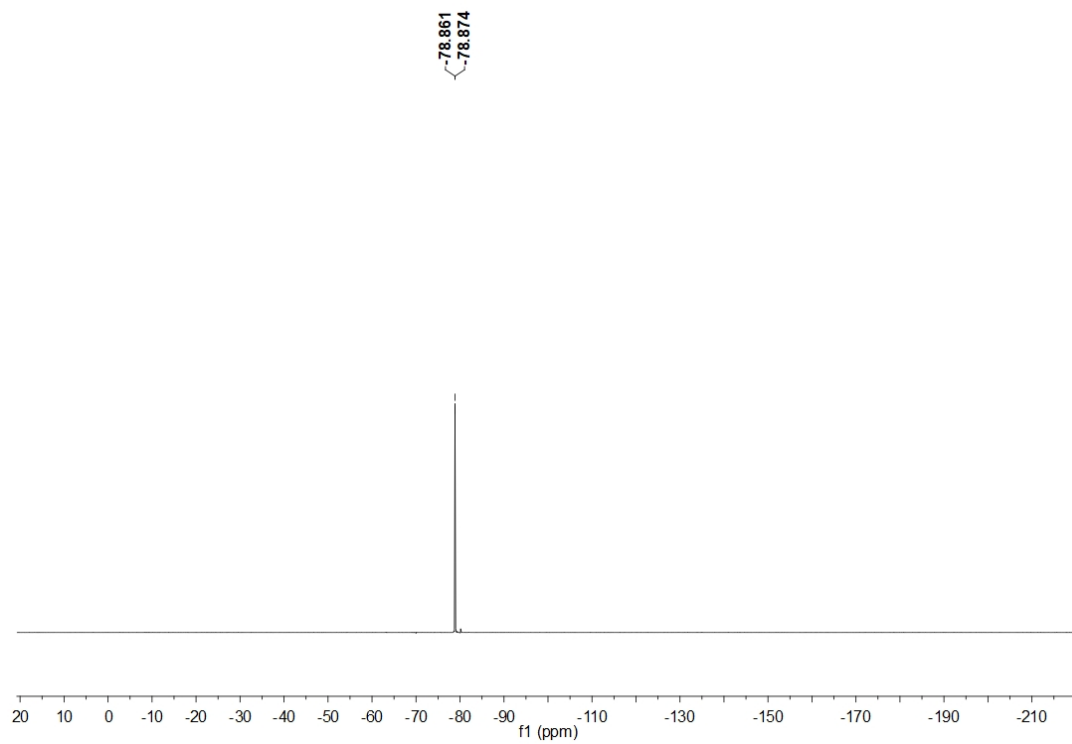

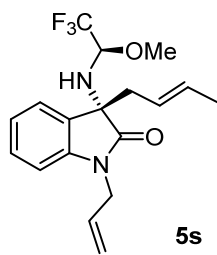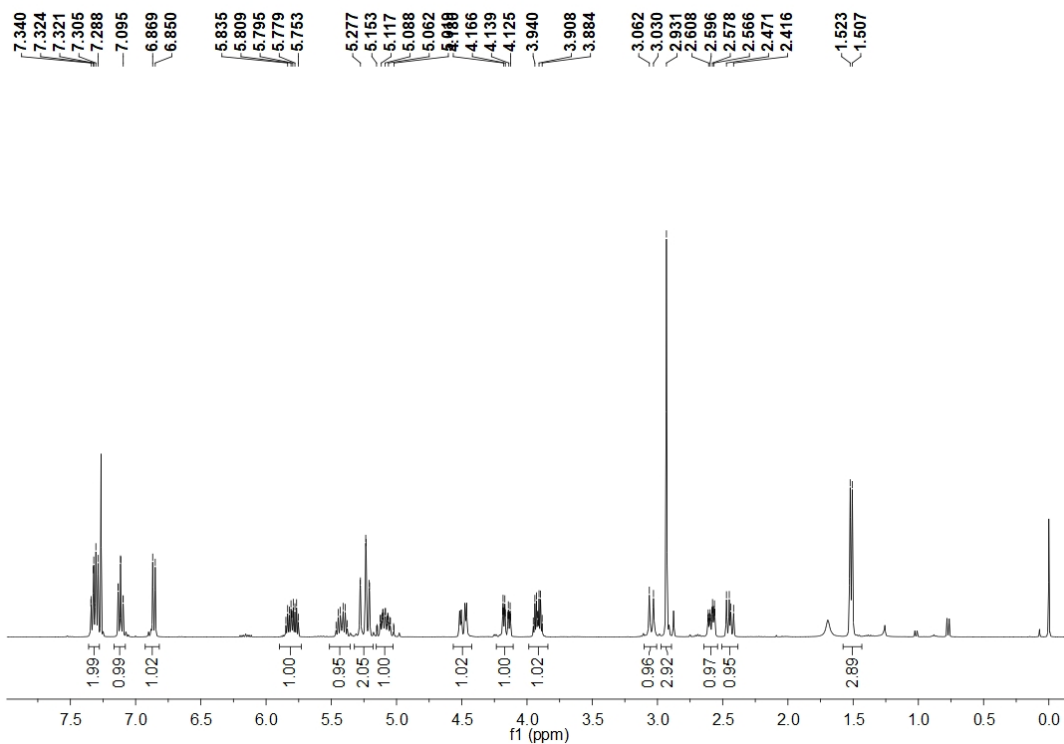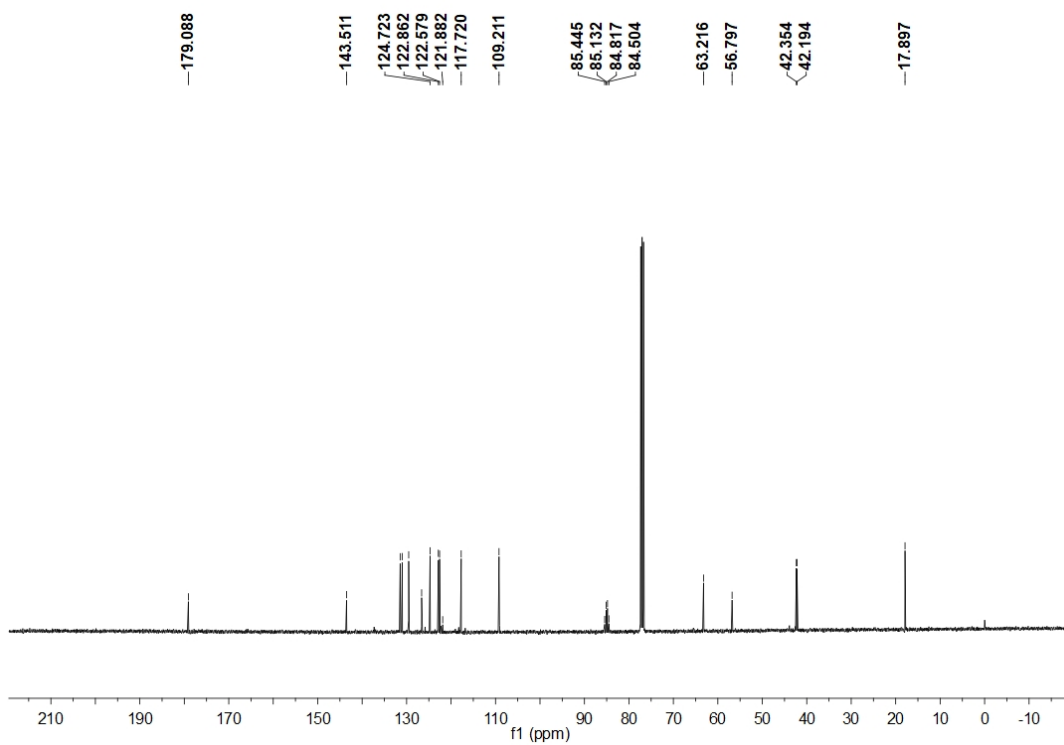

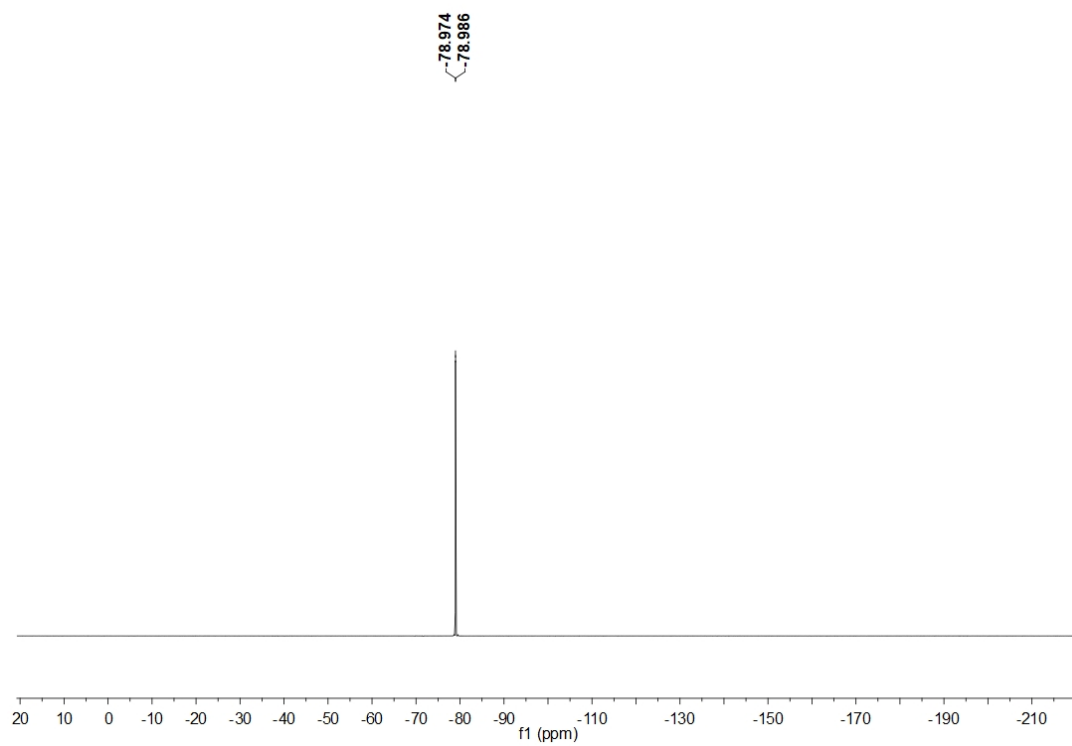

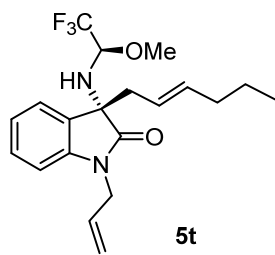

7.315  
7.312  
7.304  
7.296  
7.293  
7.285  
-7.087  
-6.868  
-6.848  
-5.817  
-5.803  
-5.800  
-5.787  
-5.774  
-5.768  
-5.761  
-5.263  
-5.237  
-5.129  
-5.092  
-5.055  
-4.425  
-4.385  
-4.225  
-4.184  
-3.954  
-3.822  
-3.898  
-3.067  
-3.035  
-2.935  
-2.577  
-2.561  
-2.457  
-2.379  
-1.843  
-1.818  
-1.782  
-1.724  
-1.200  
-1.166  
-0.766  
-0.748  
-0.730

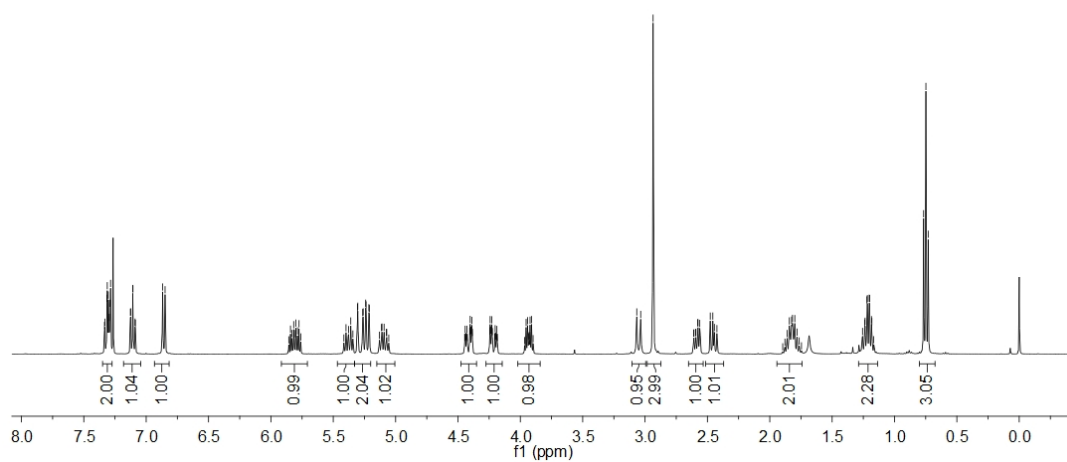

-179.081  
-143.520  
-136.444  
-122.544  
-121.885  
-121.759  
-117.946  
-109.181  
-85.402  
-85.089  
-84.774  
-84.460  
-63.175  
-56.685  
-42.429  
-42.260  
-34.516  
-22.257  
-13.461

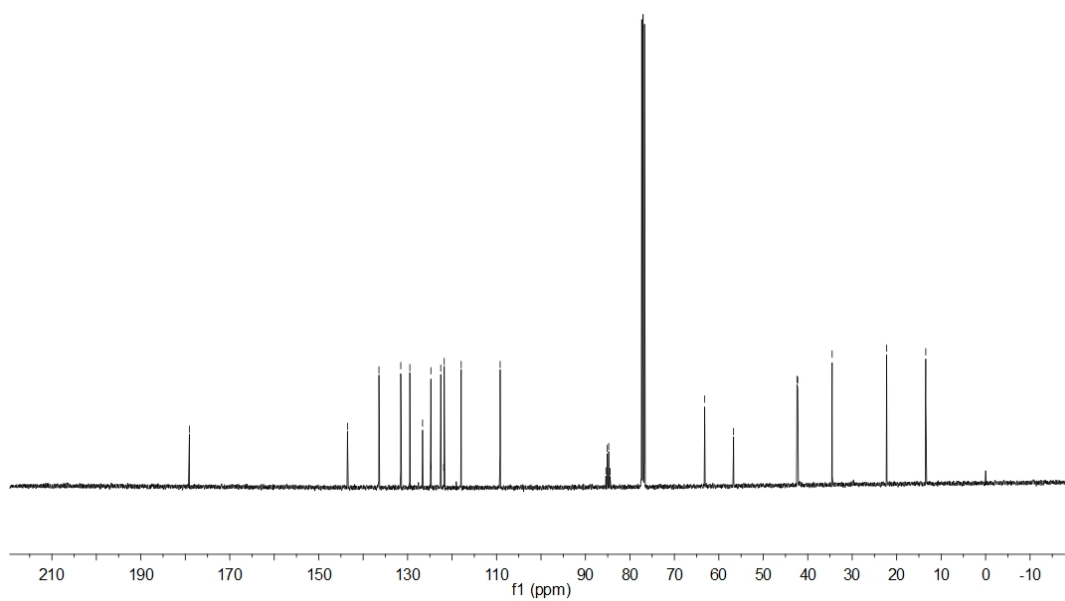

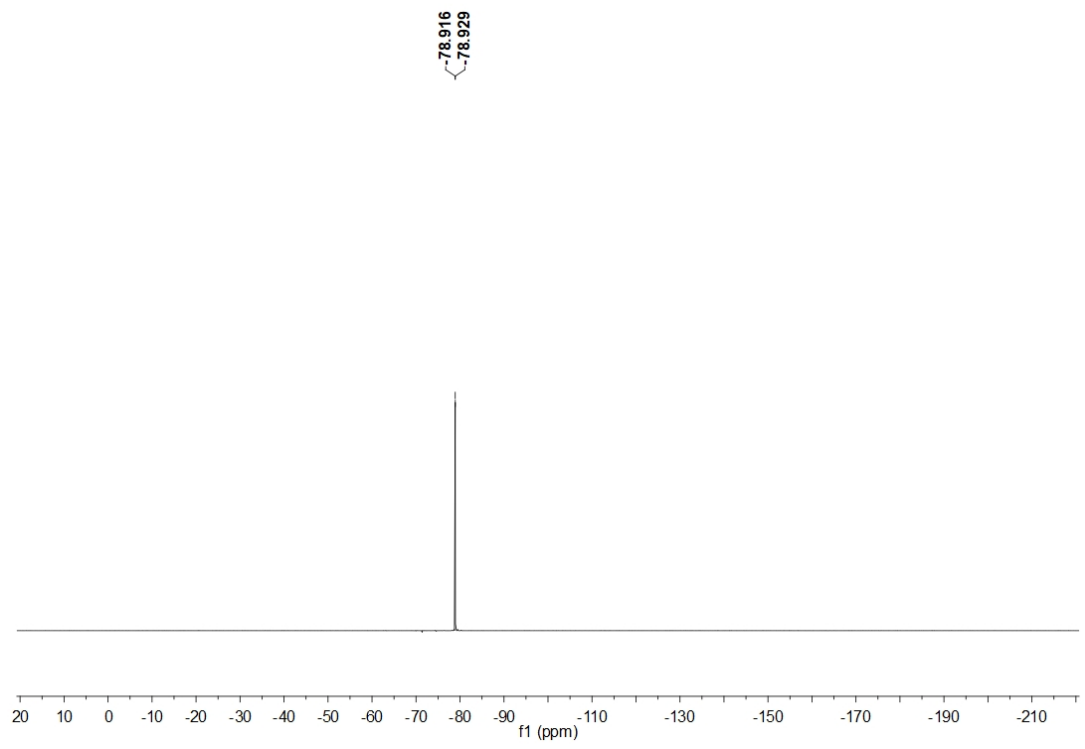





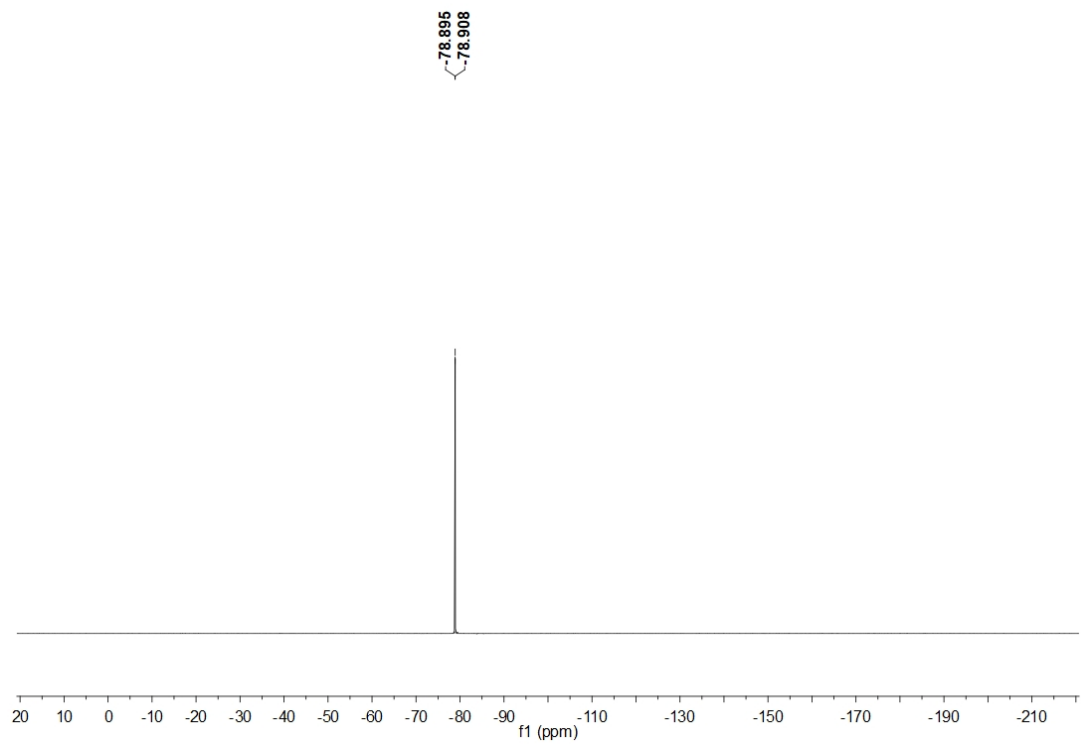

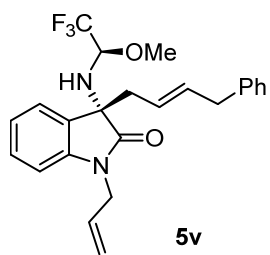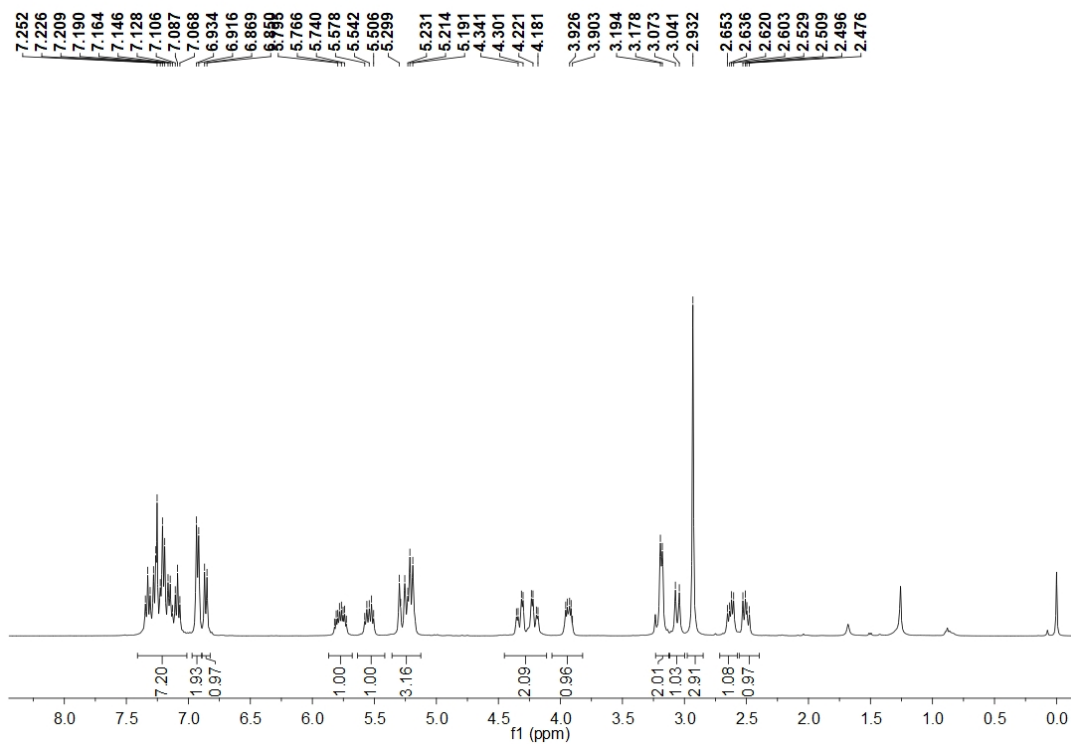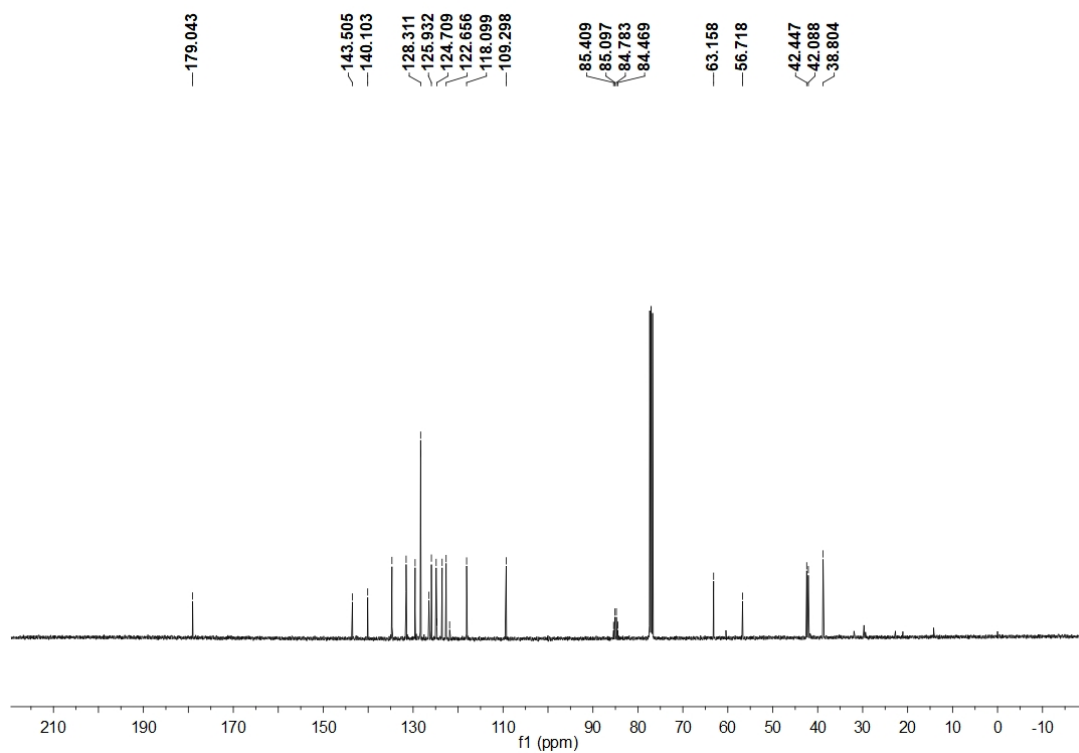

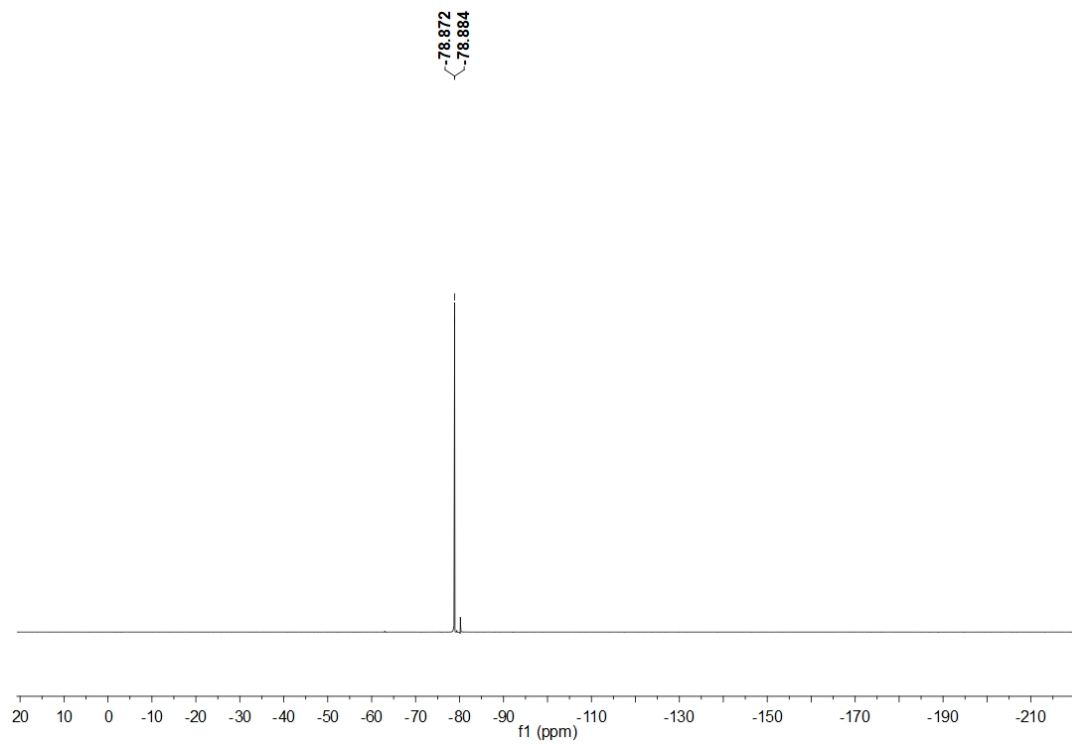

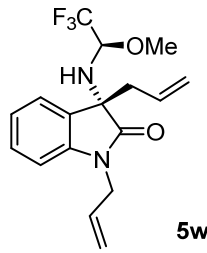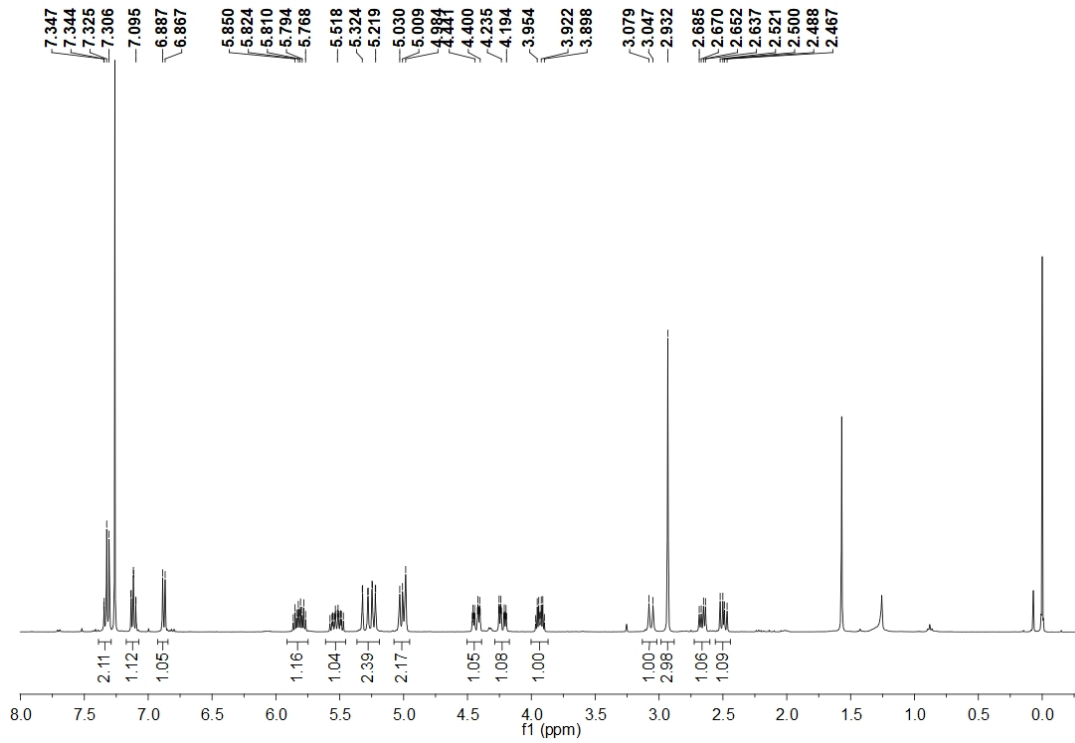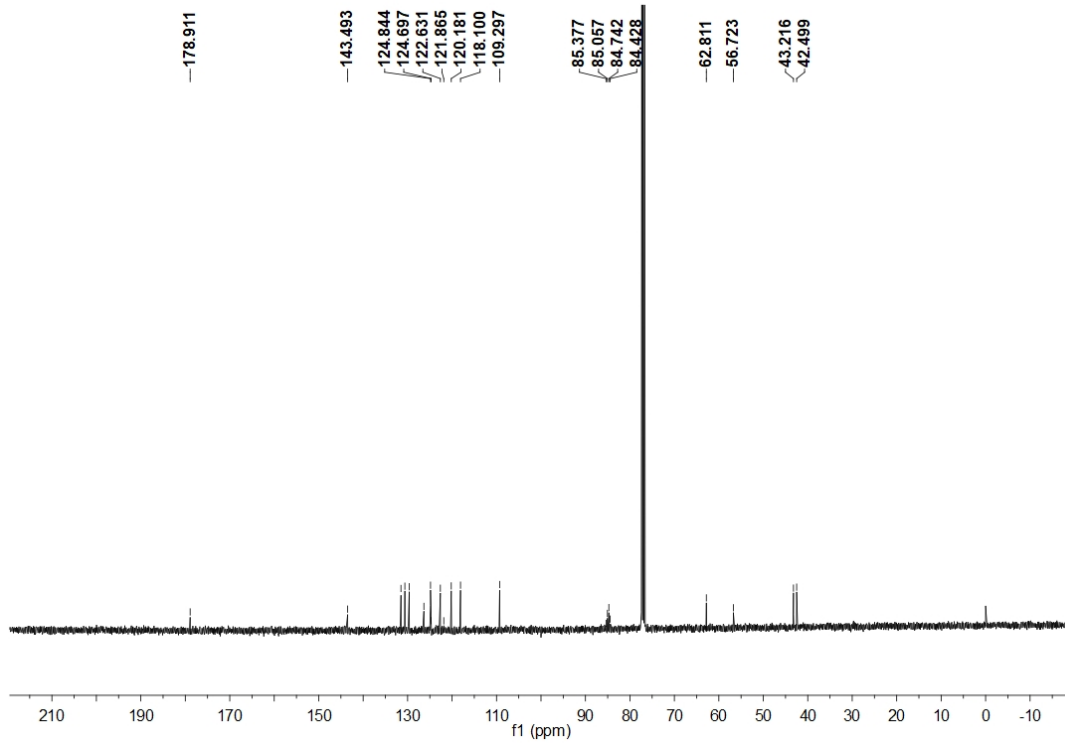

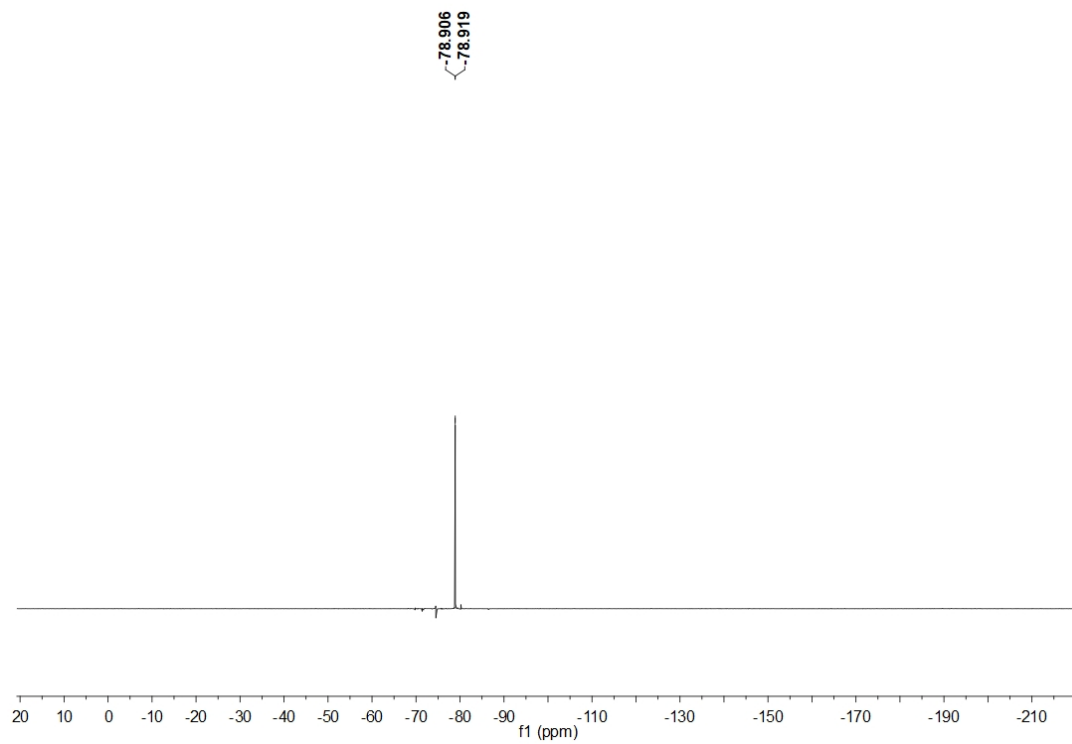

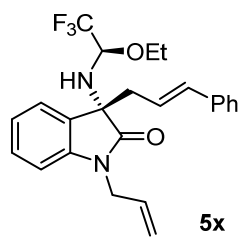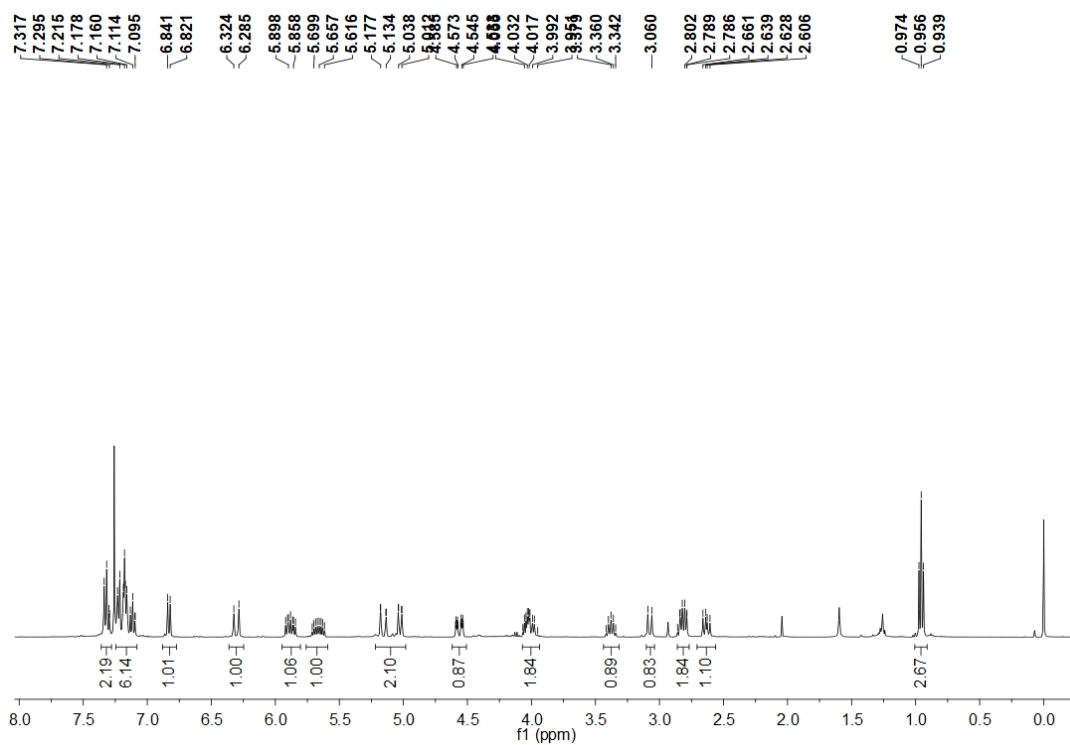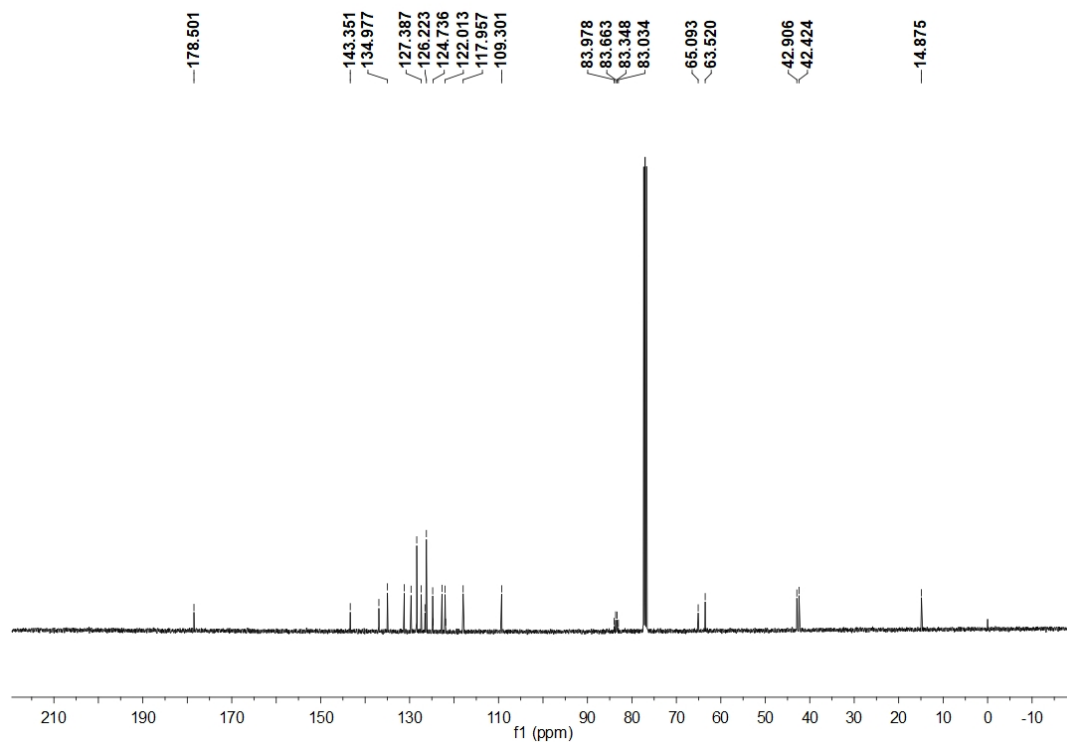

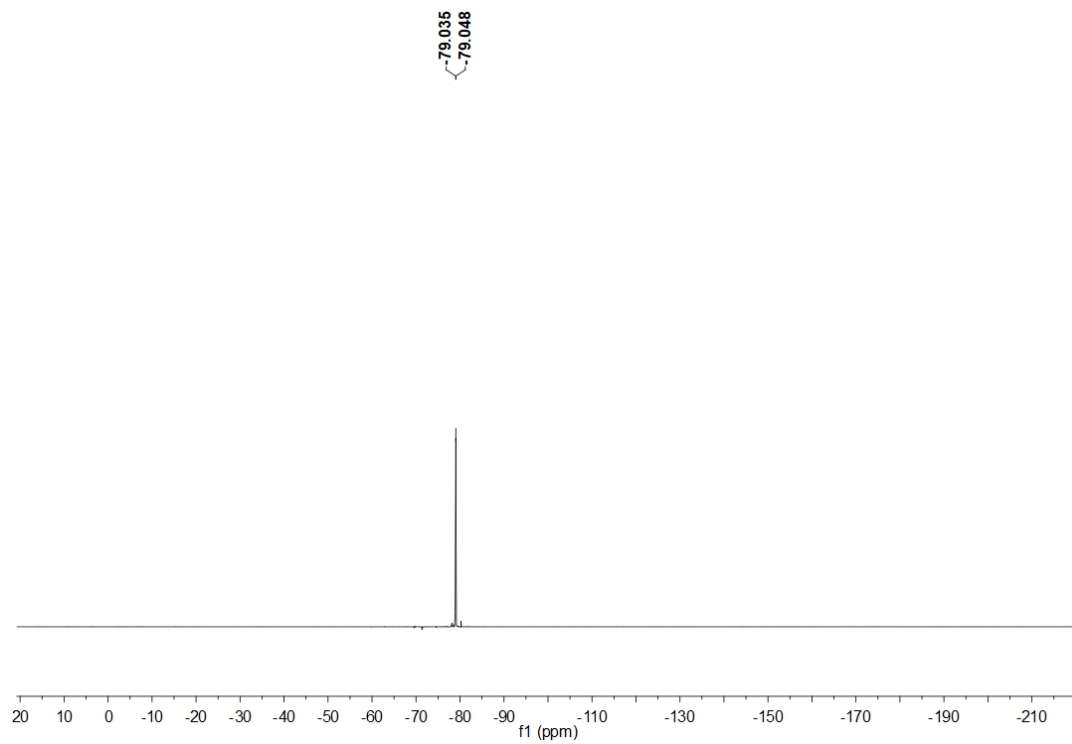

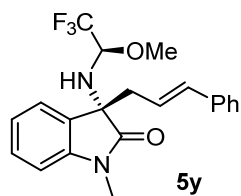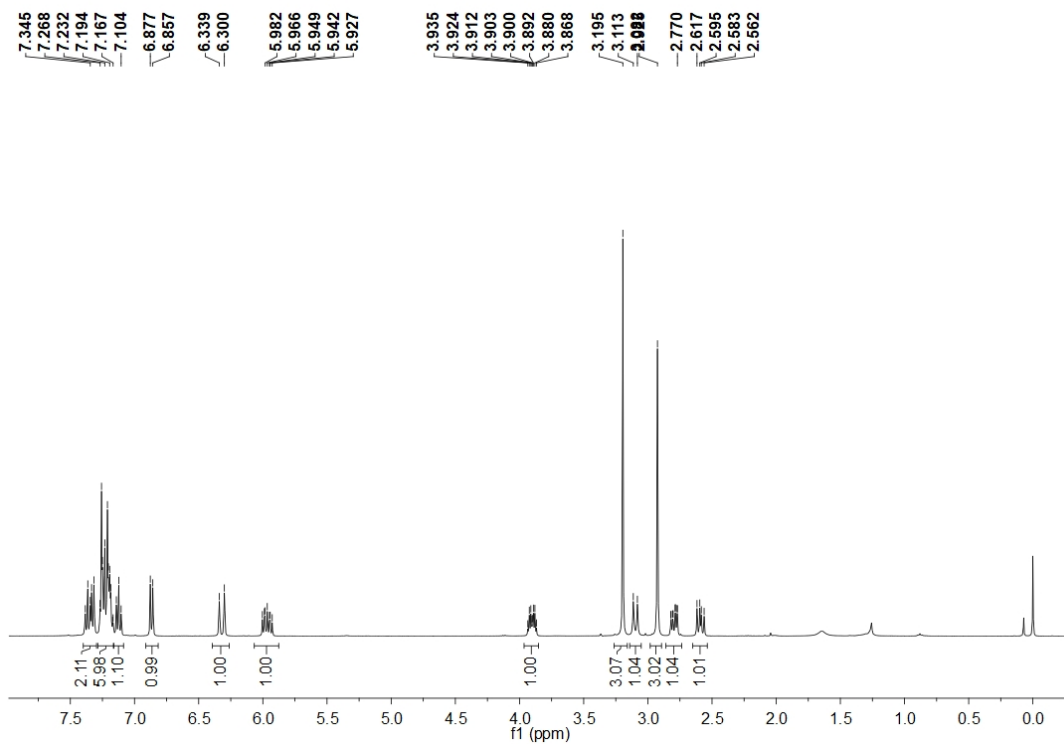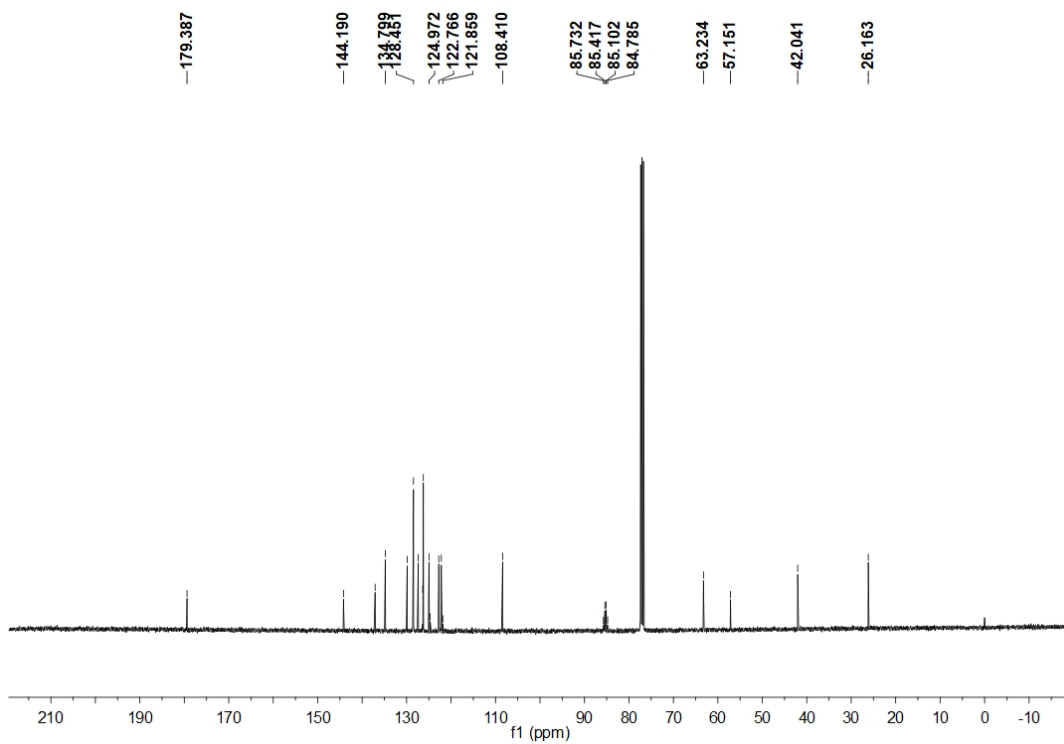



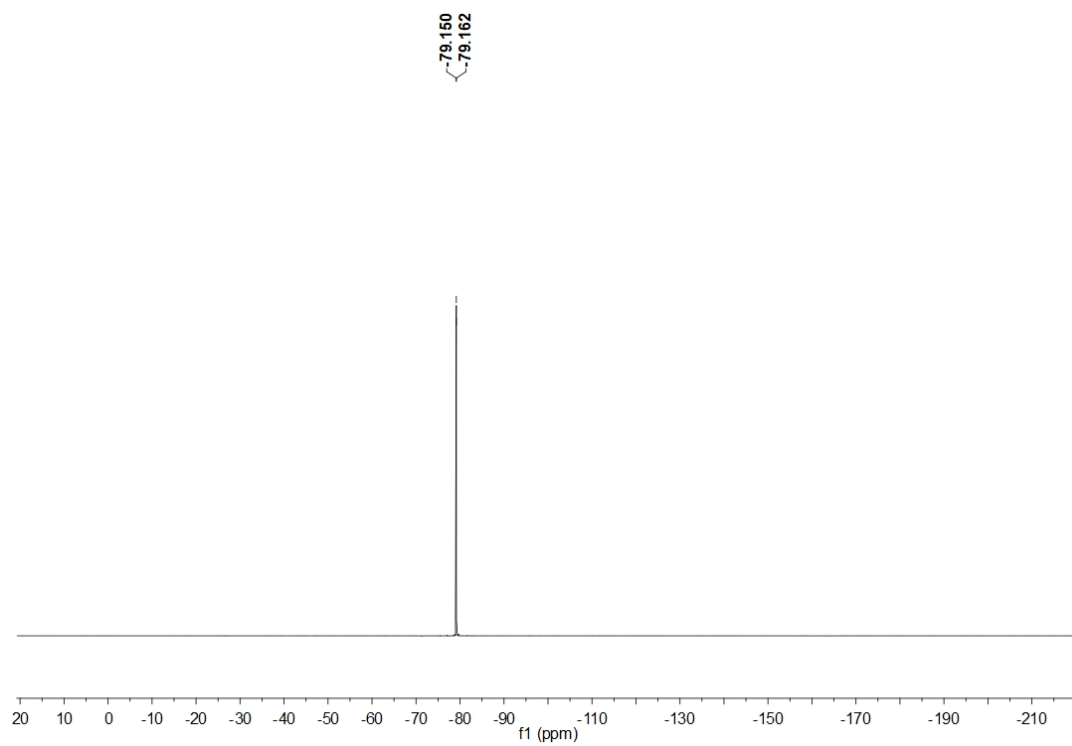

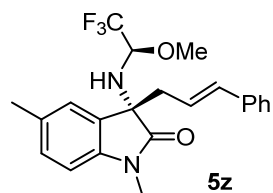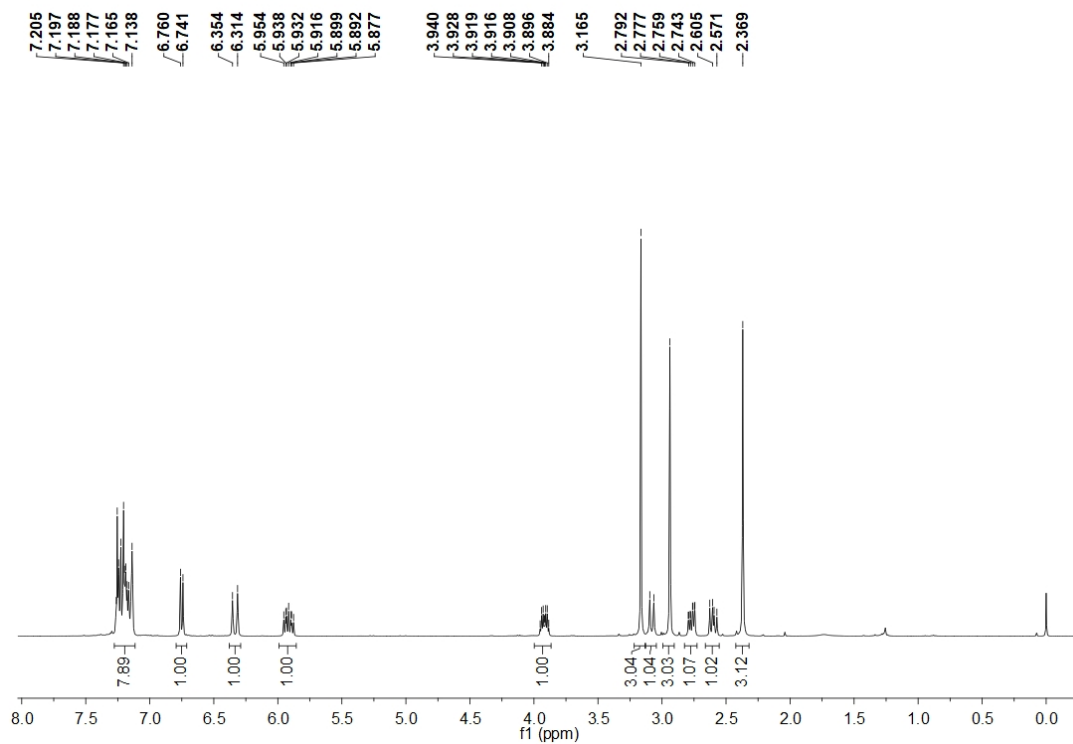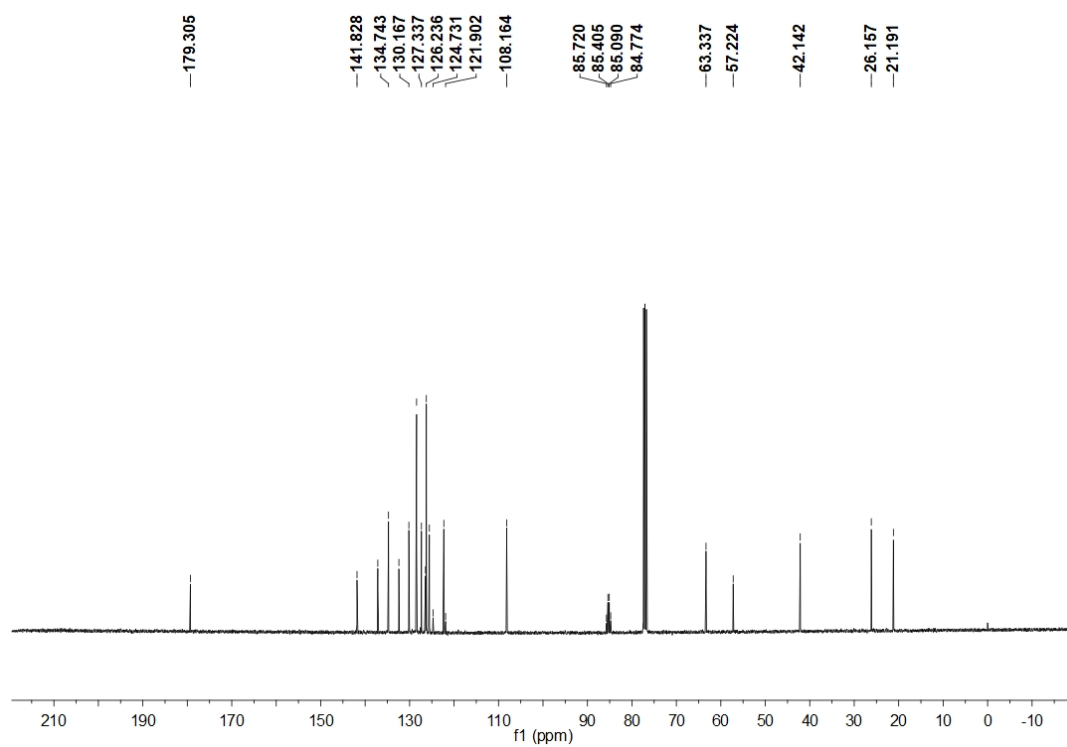

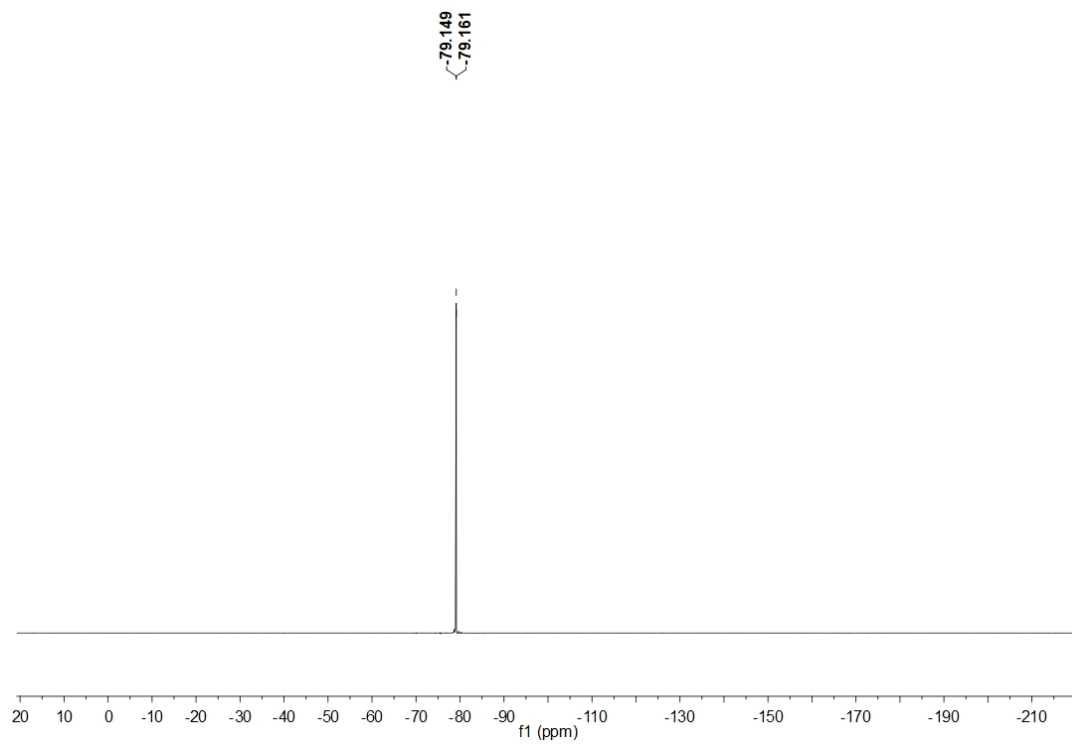

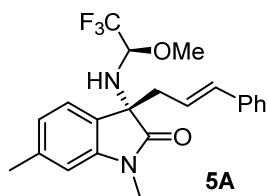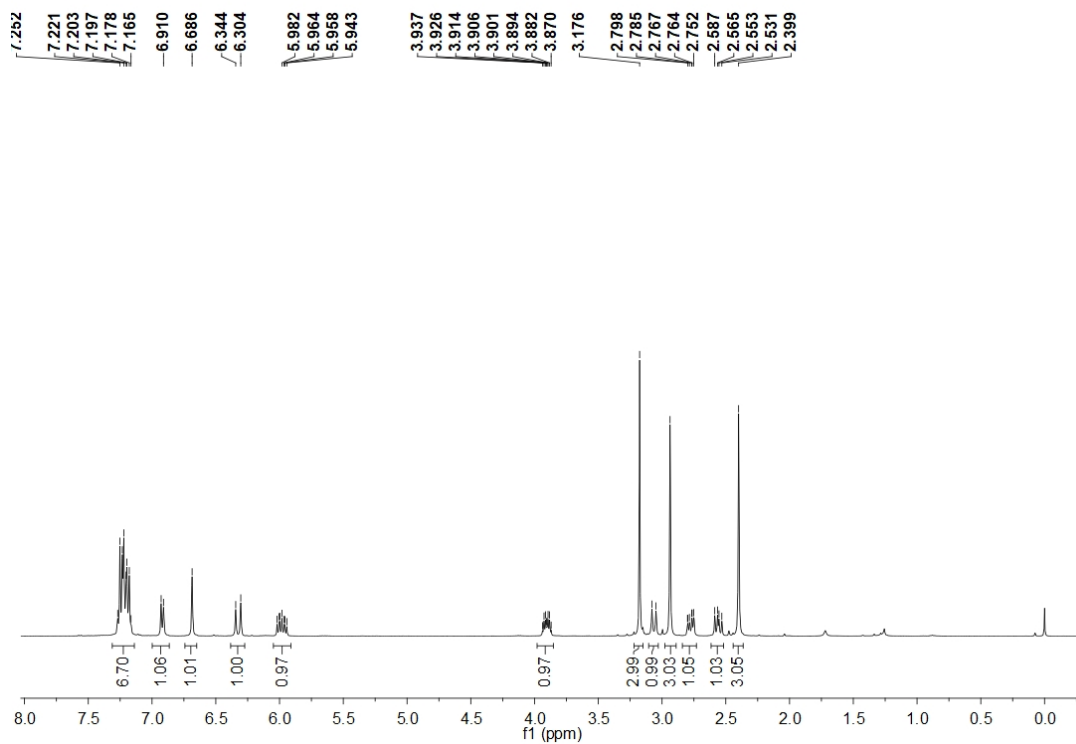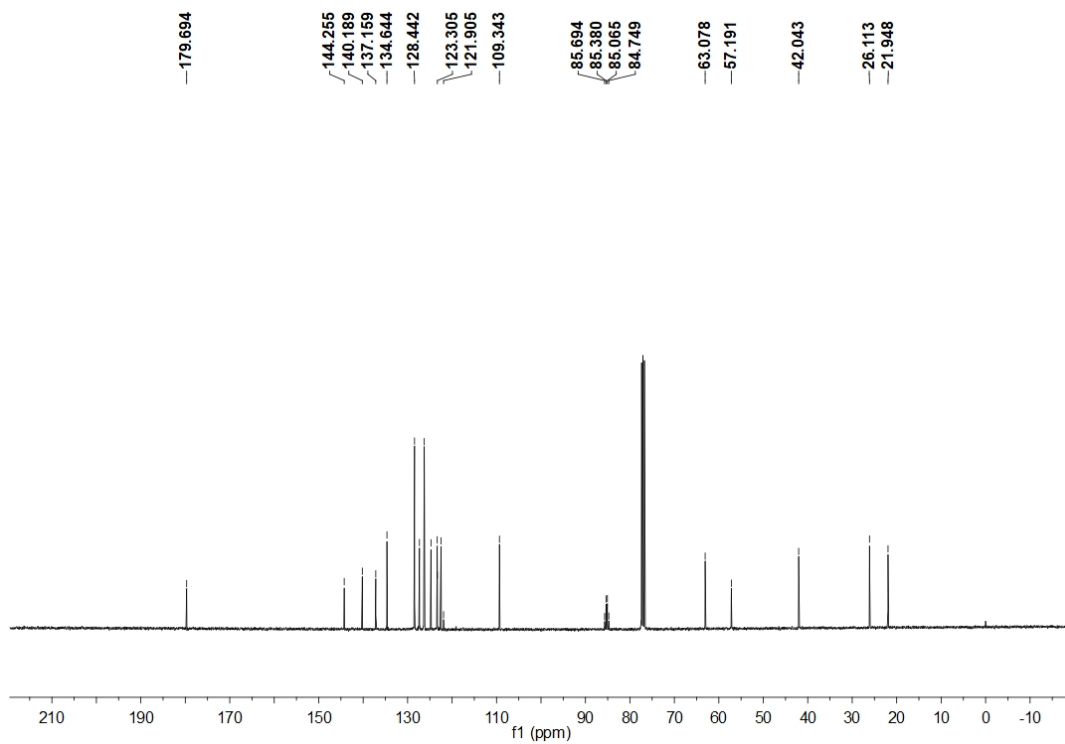

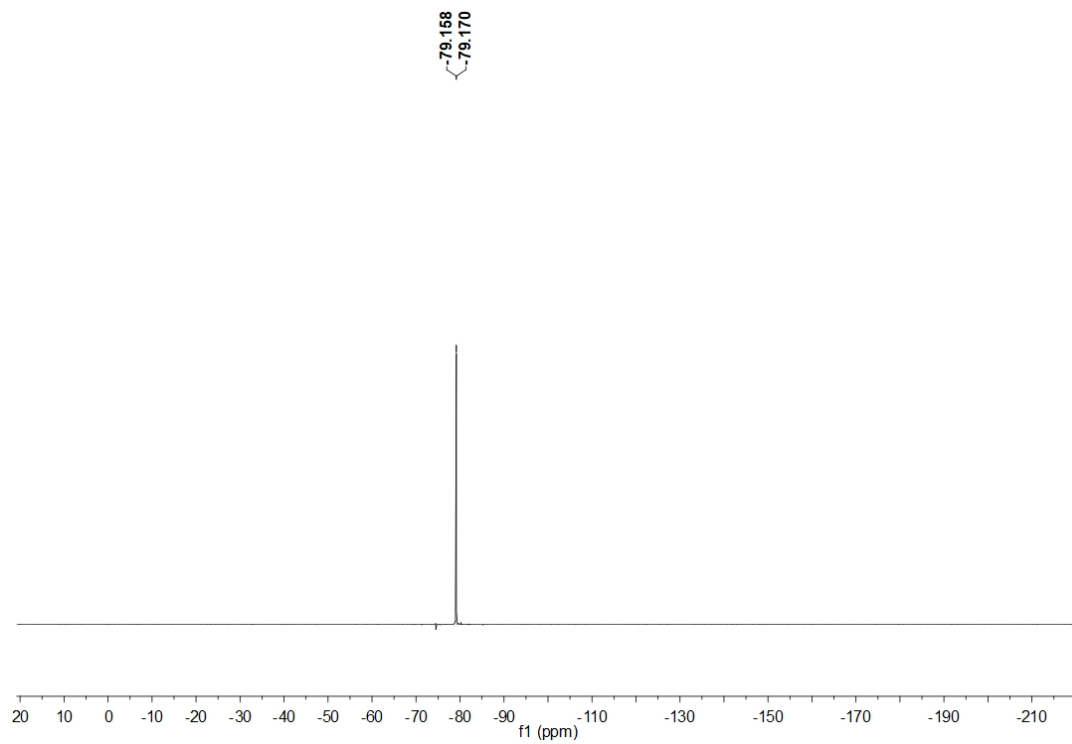

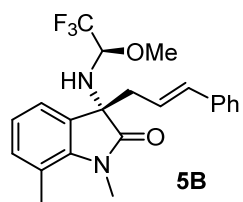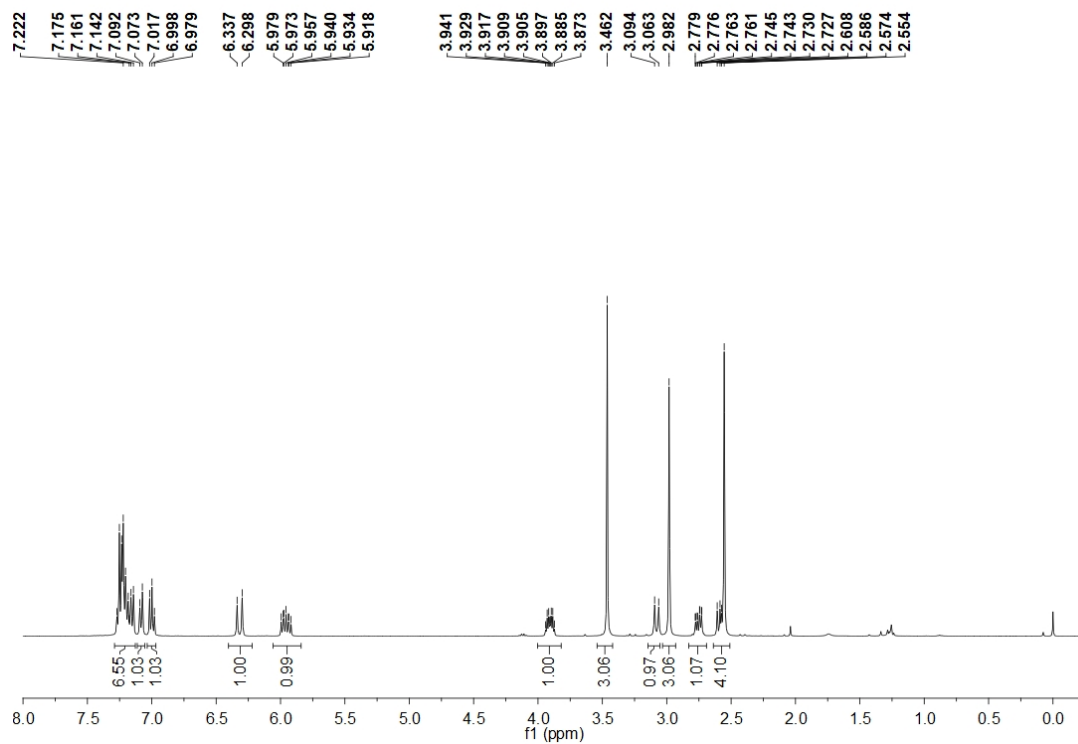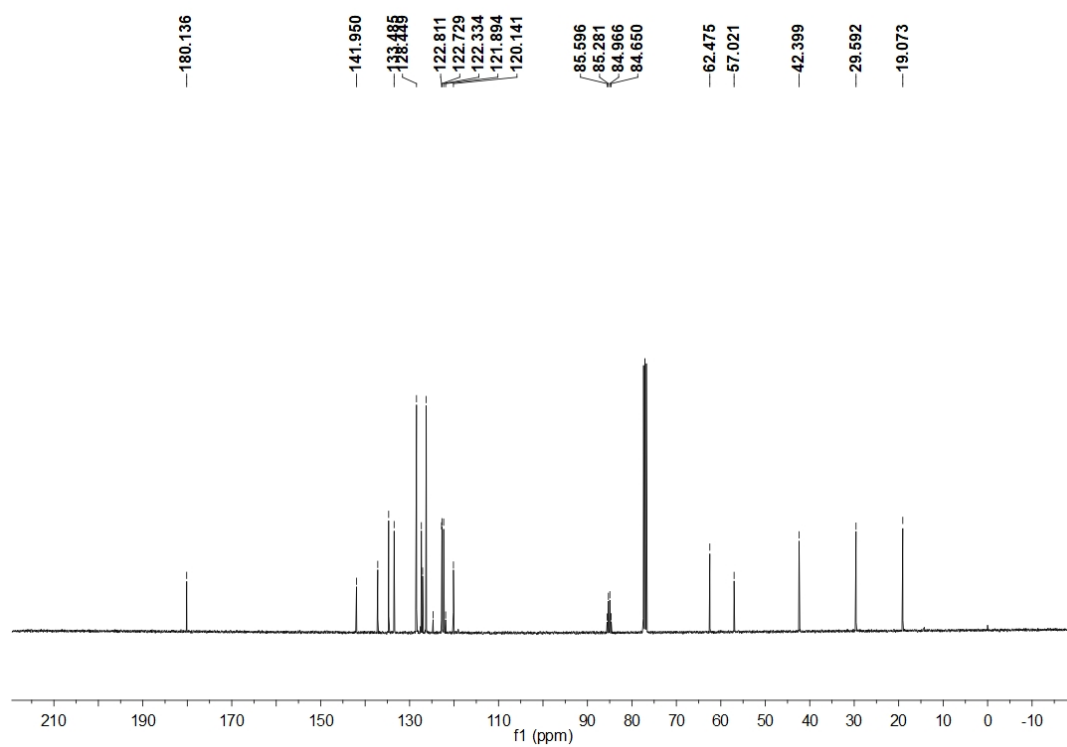

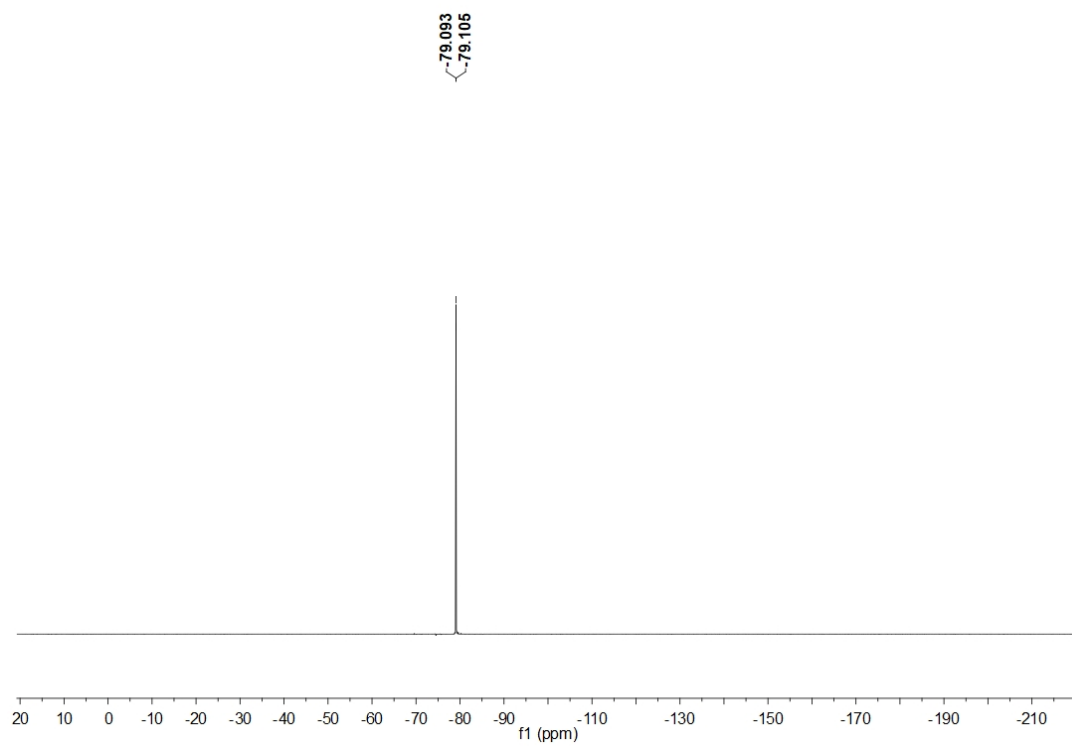

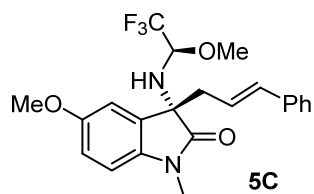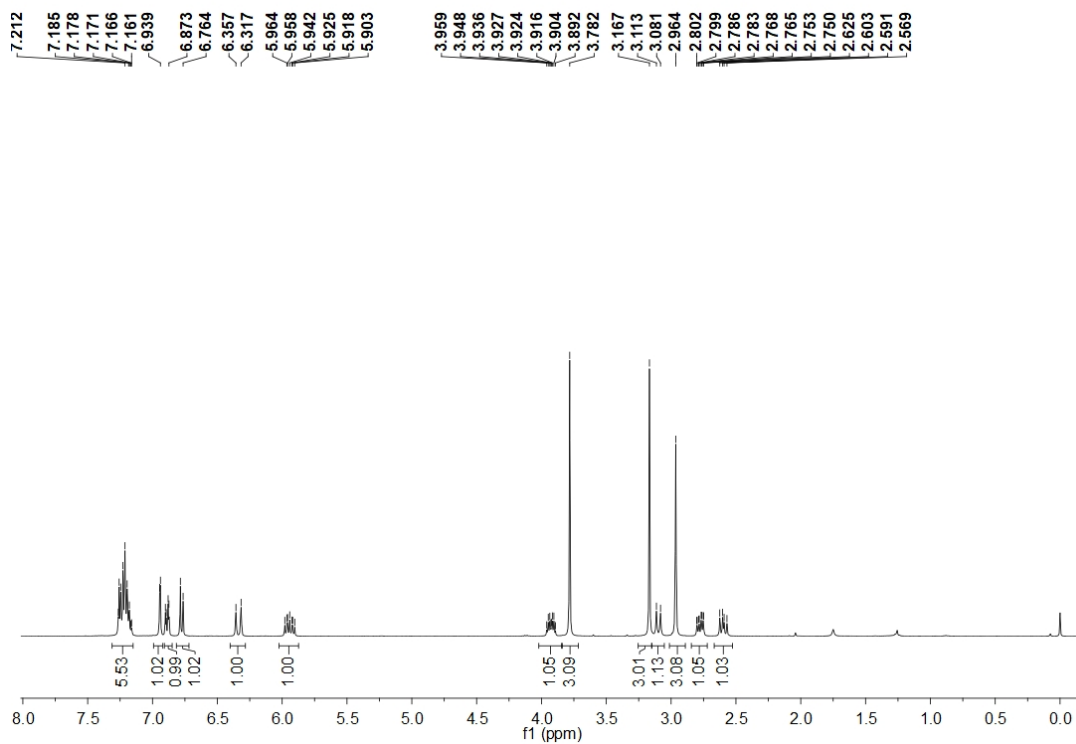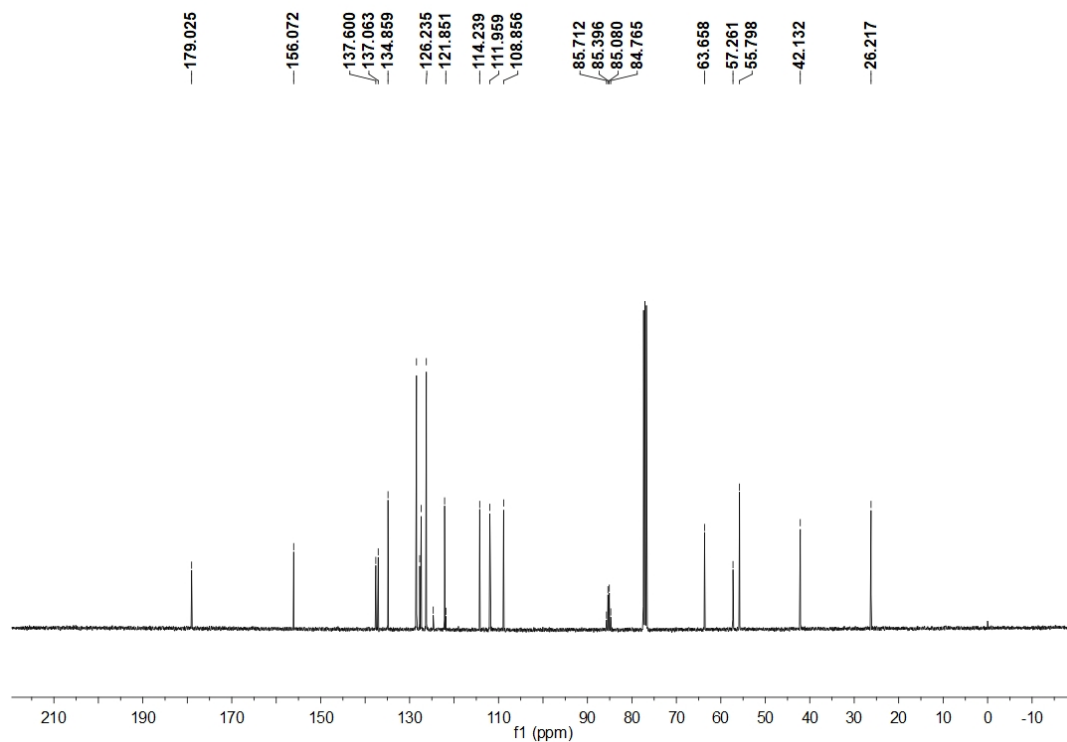



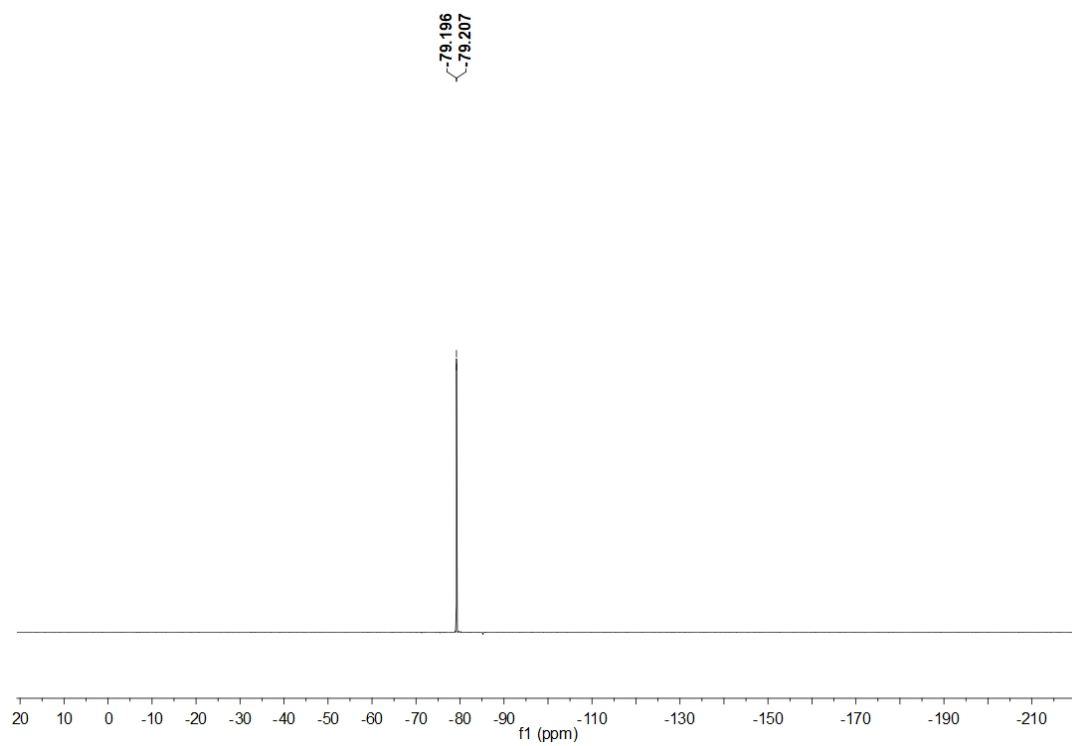

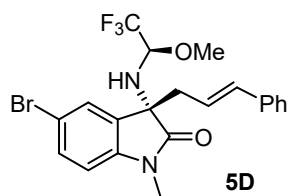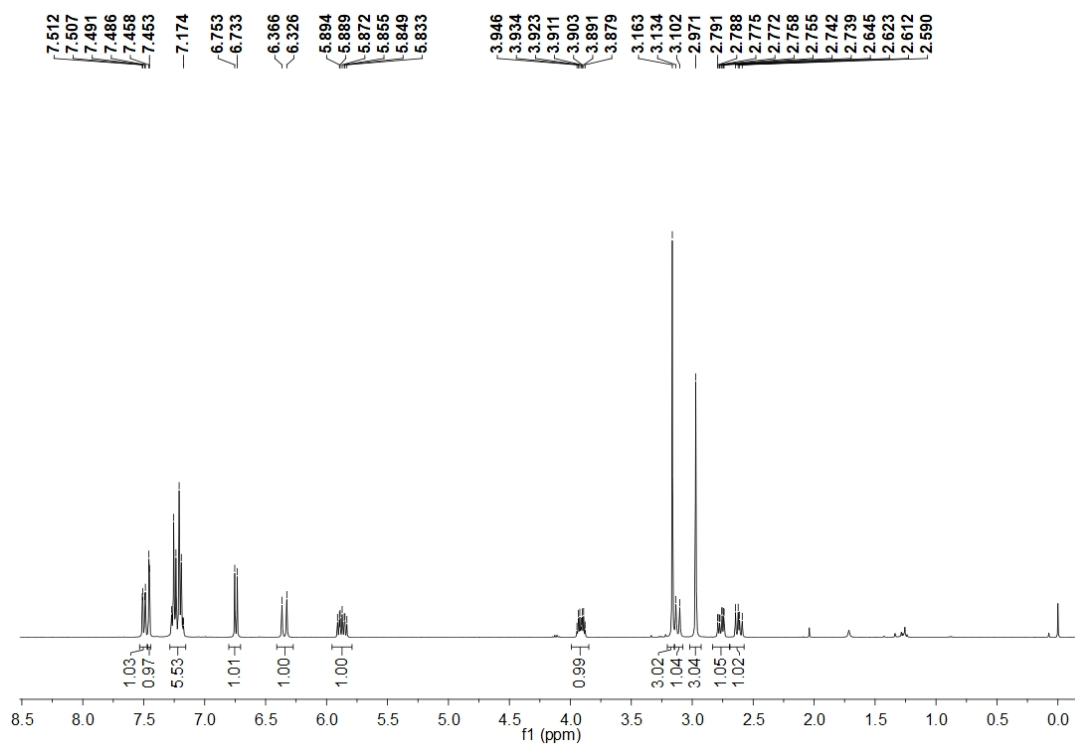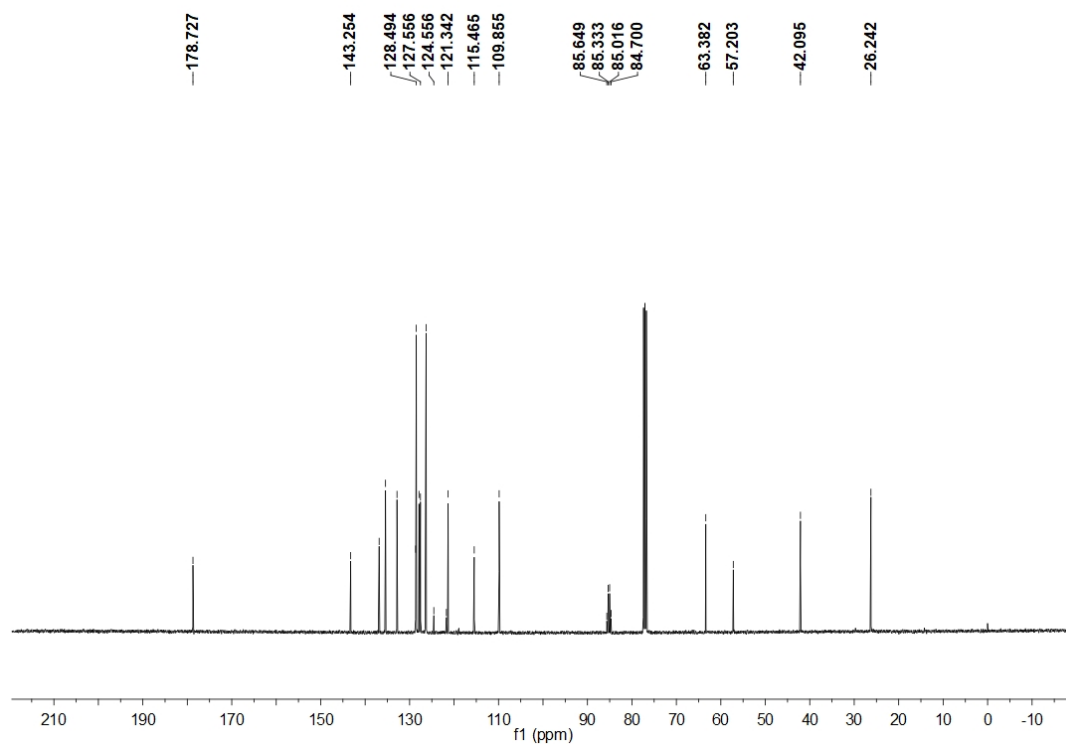

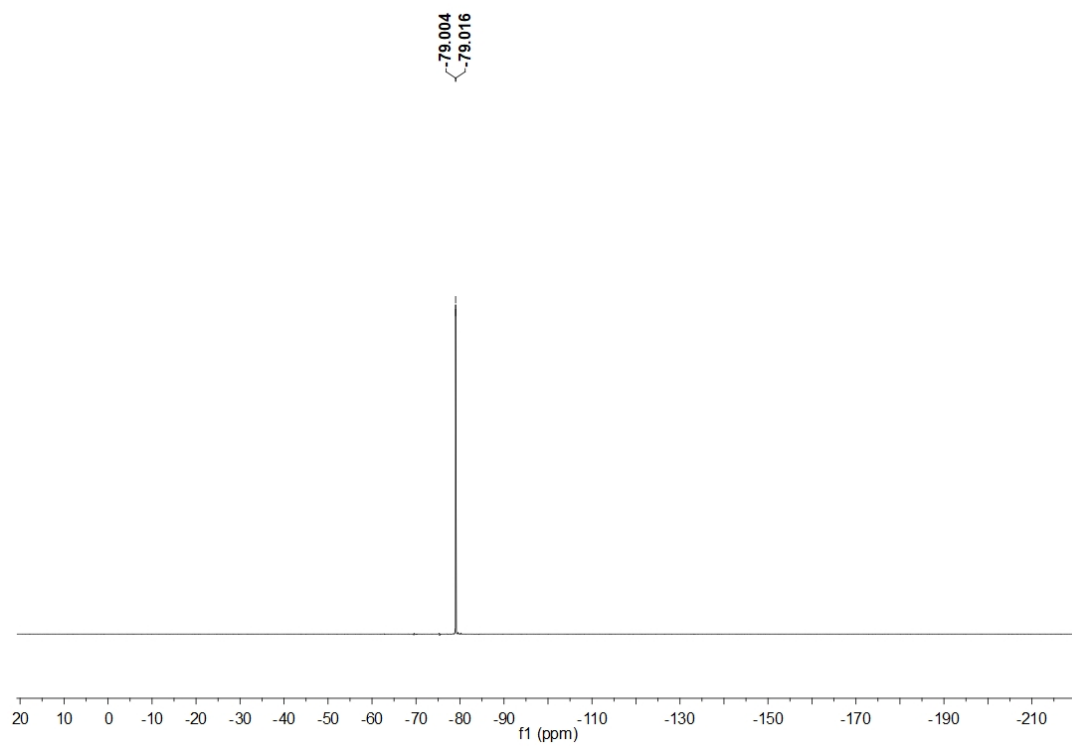

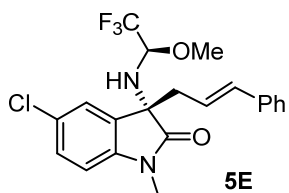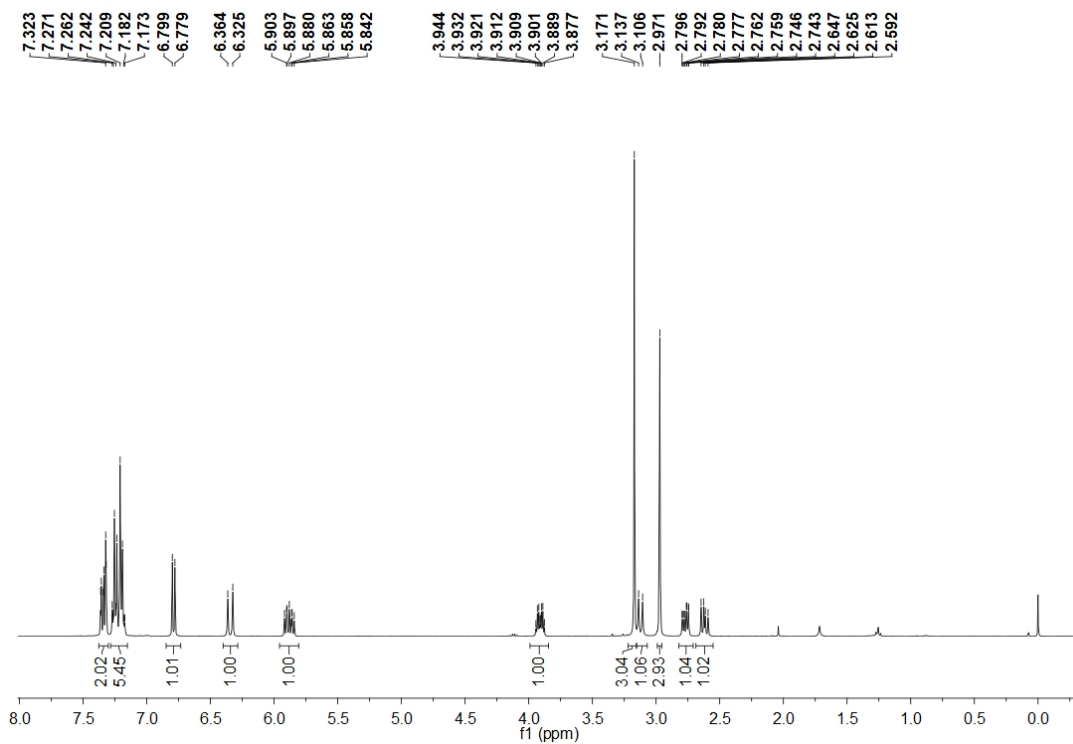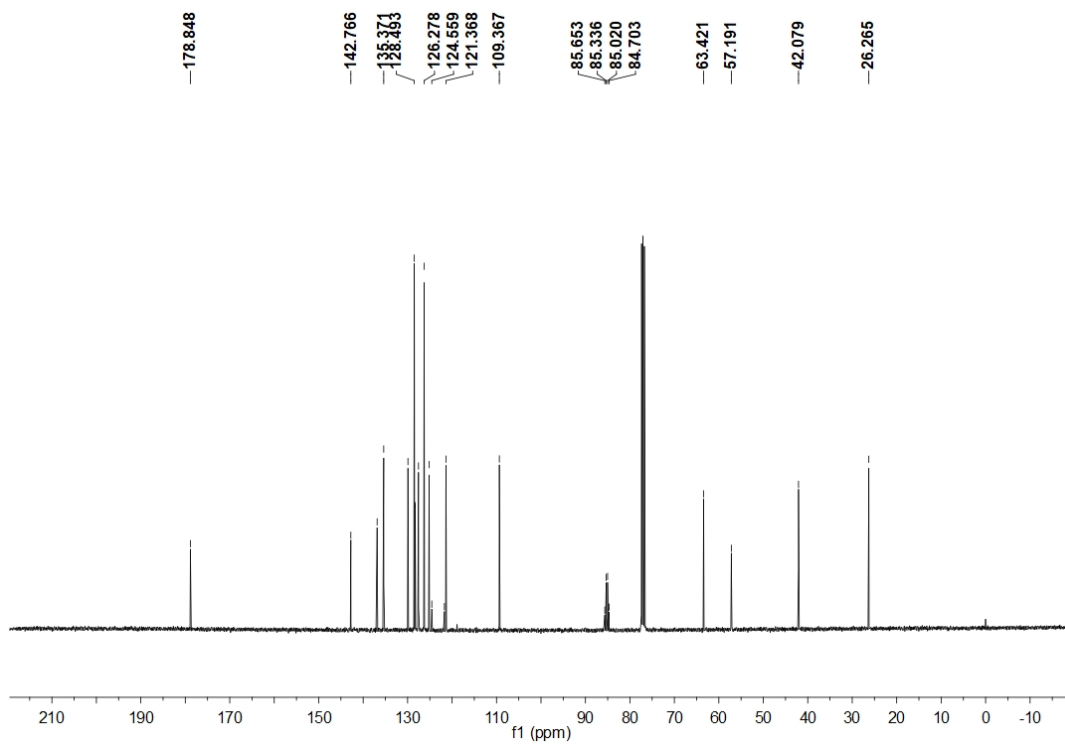

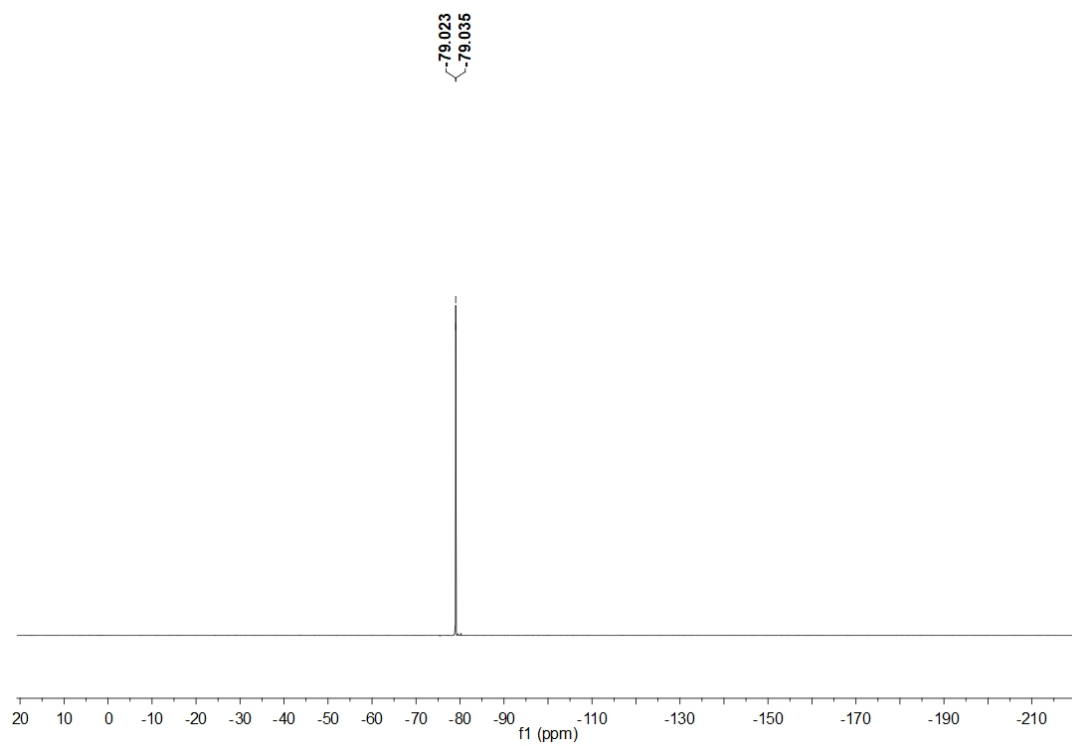

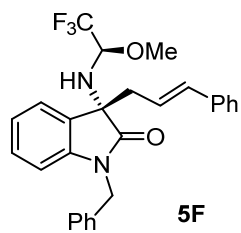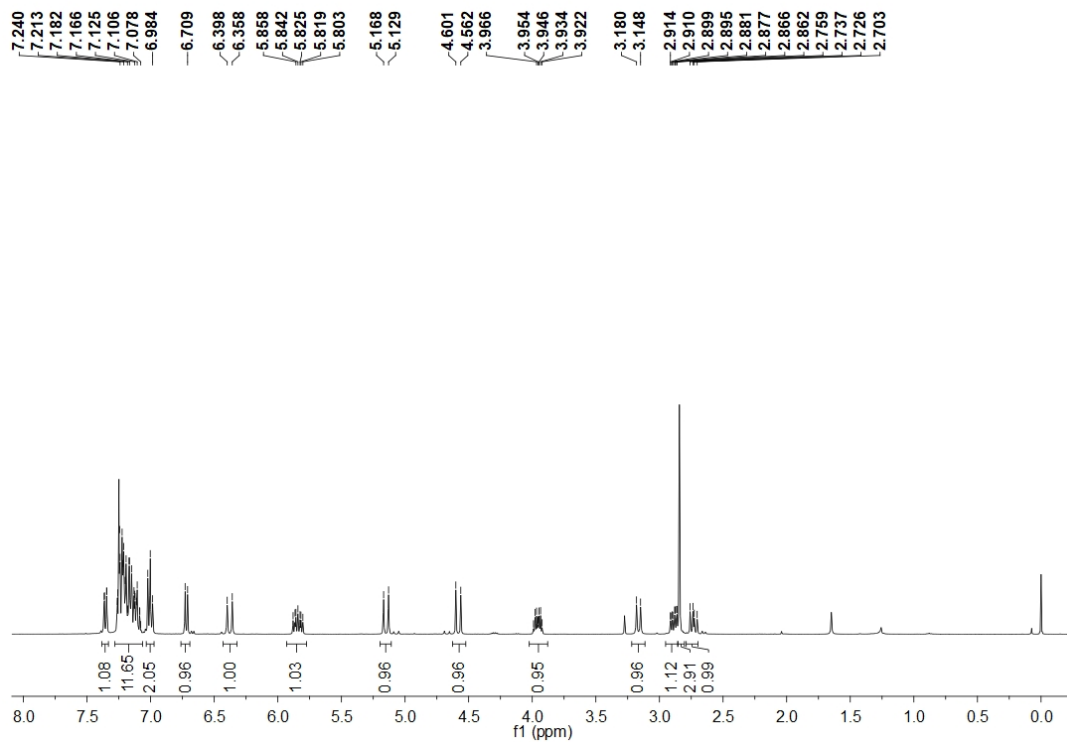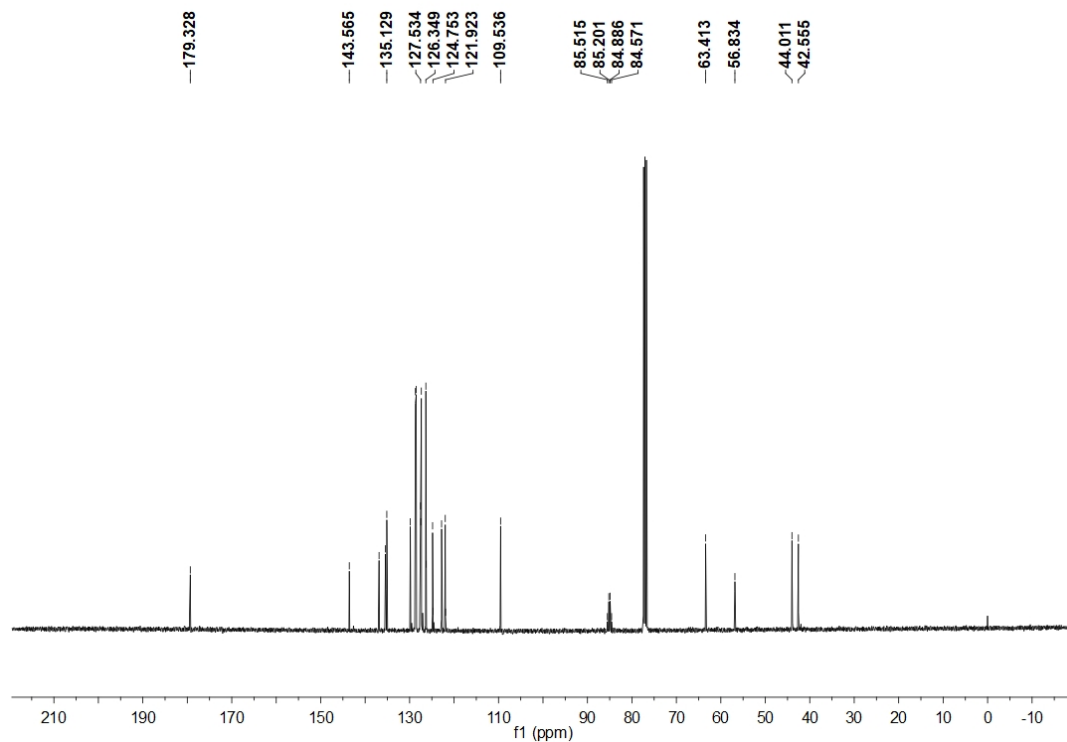

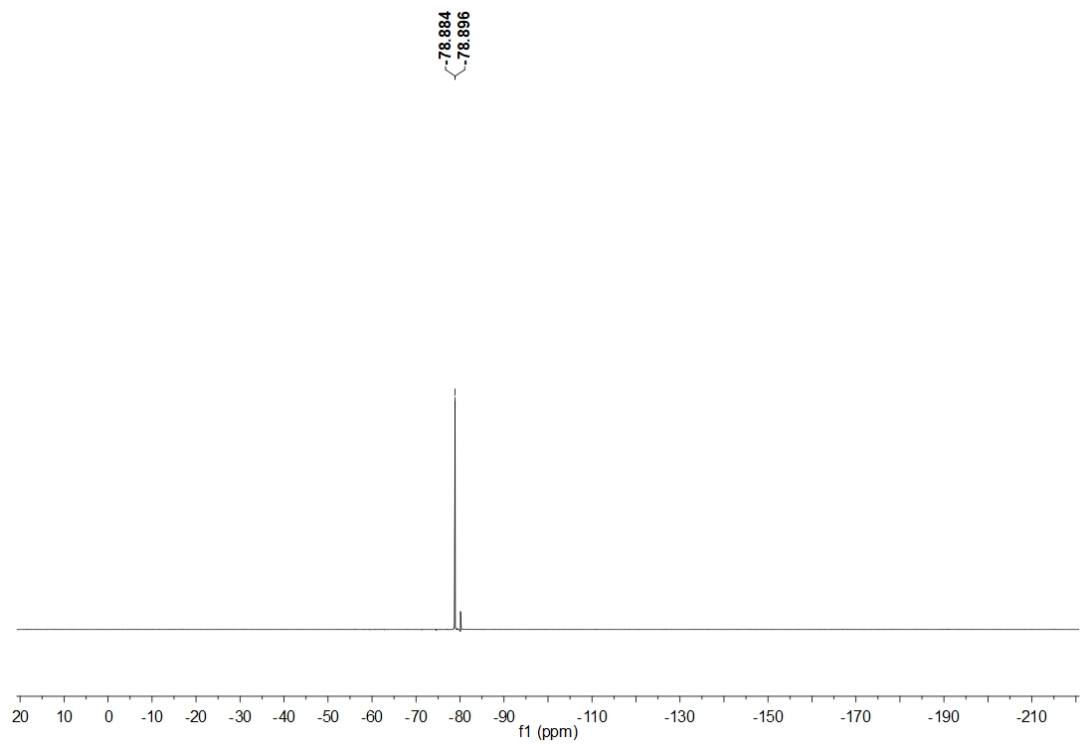

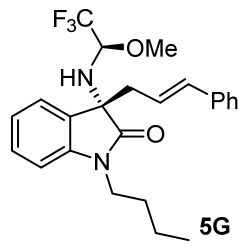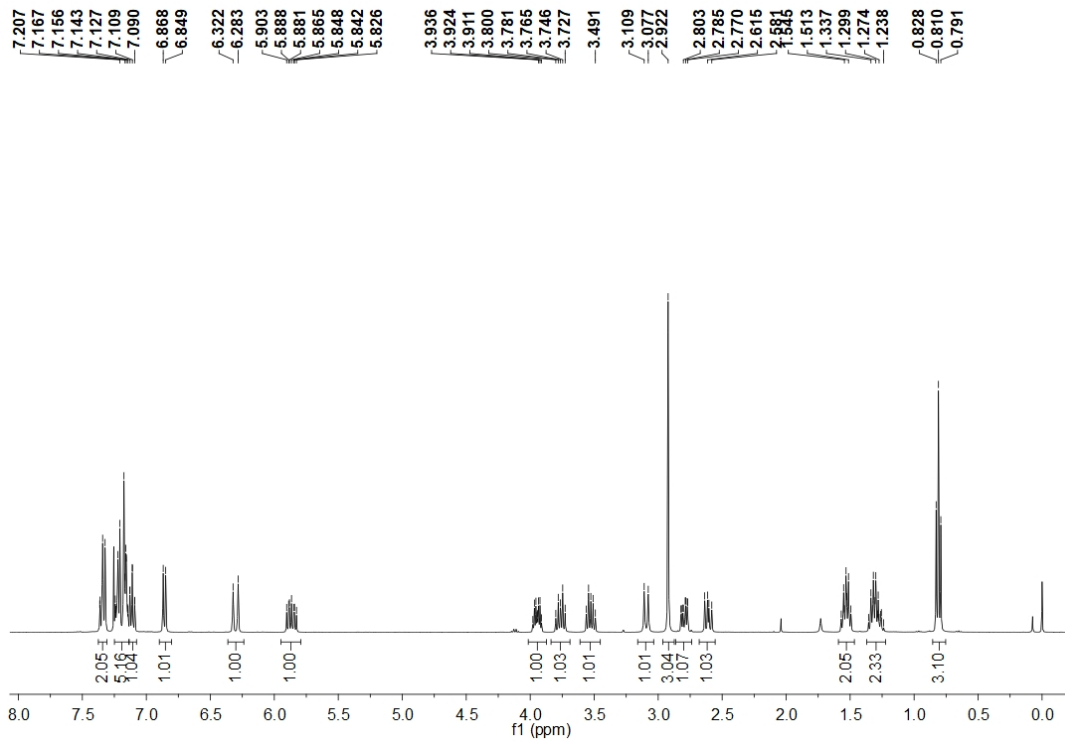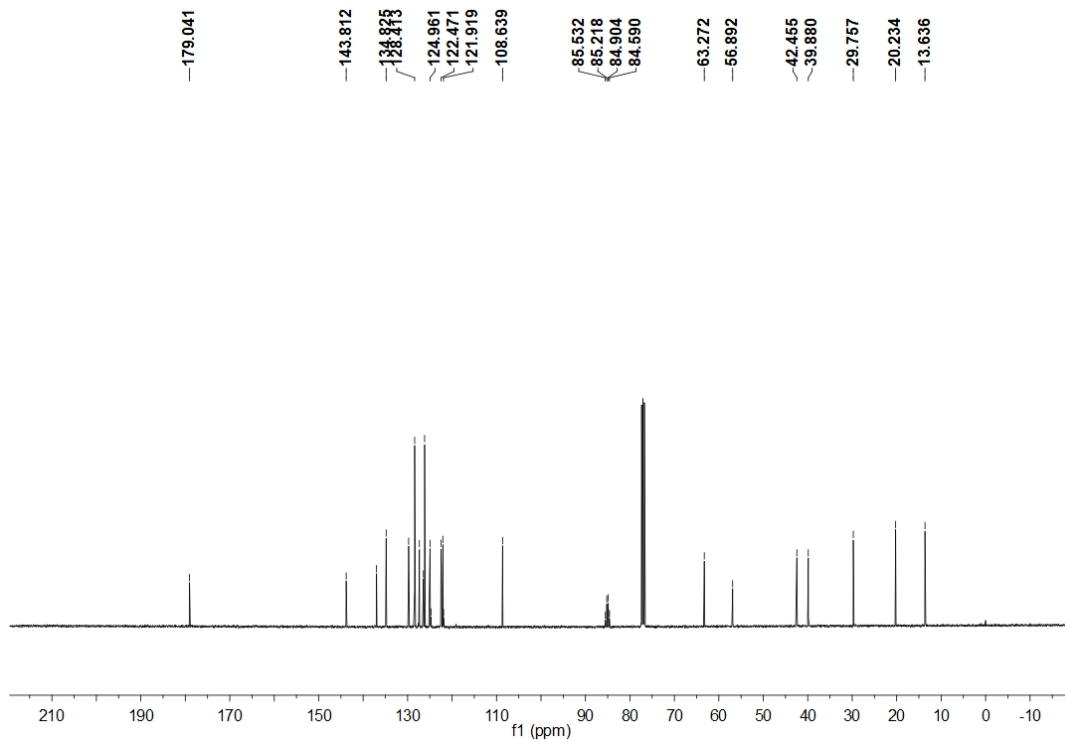



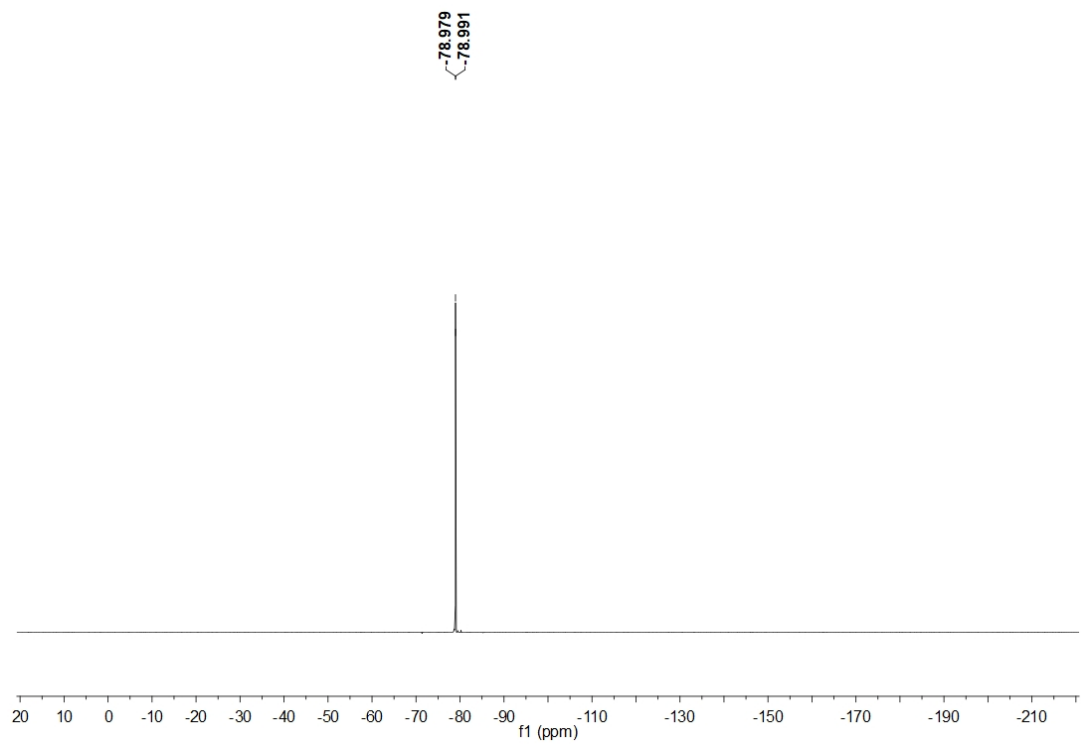



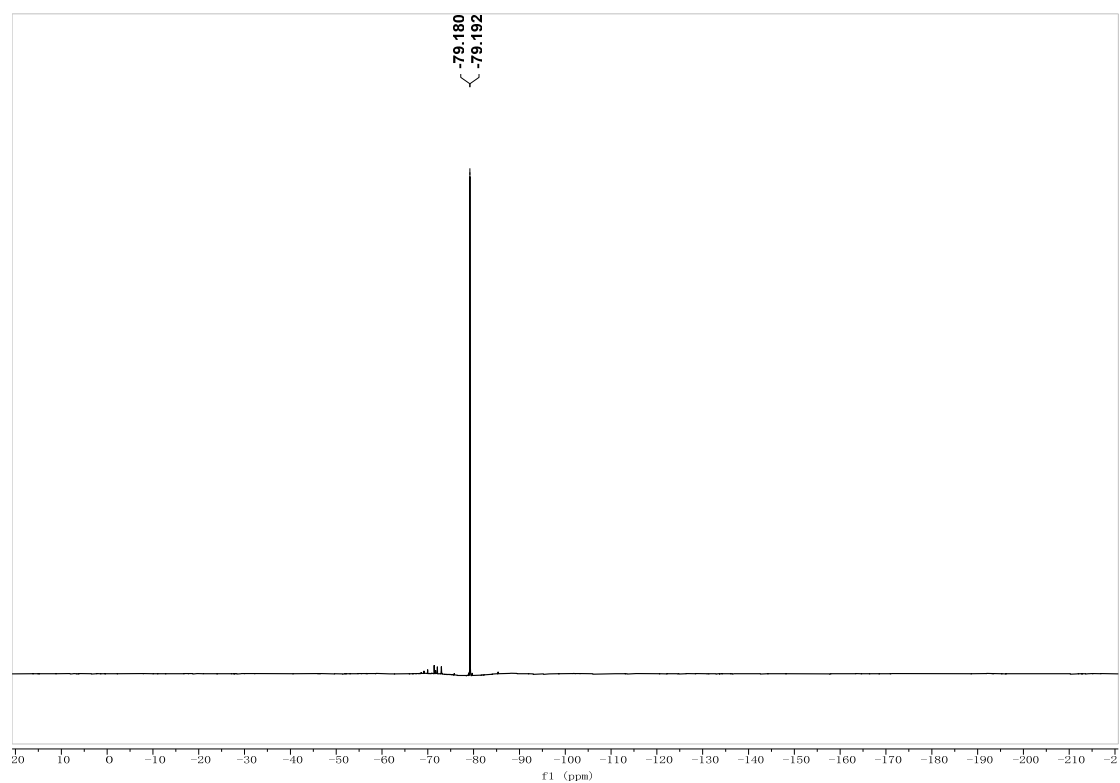

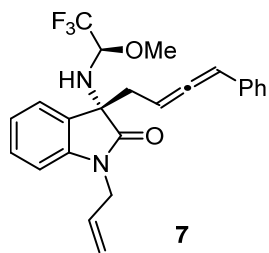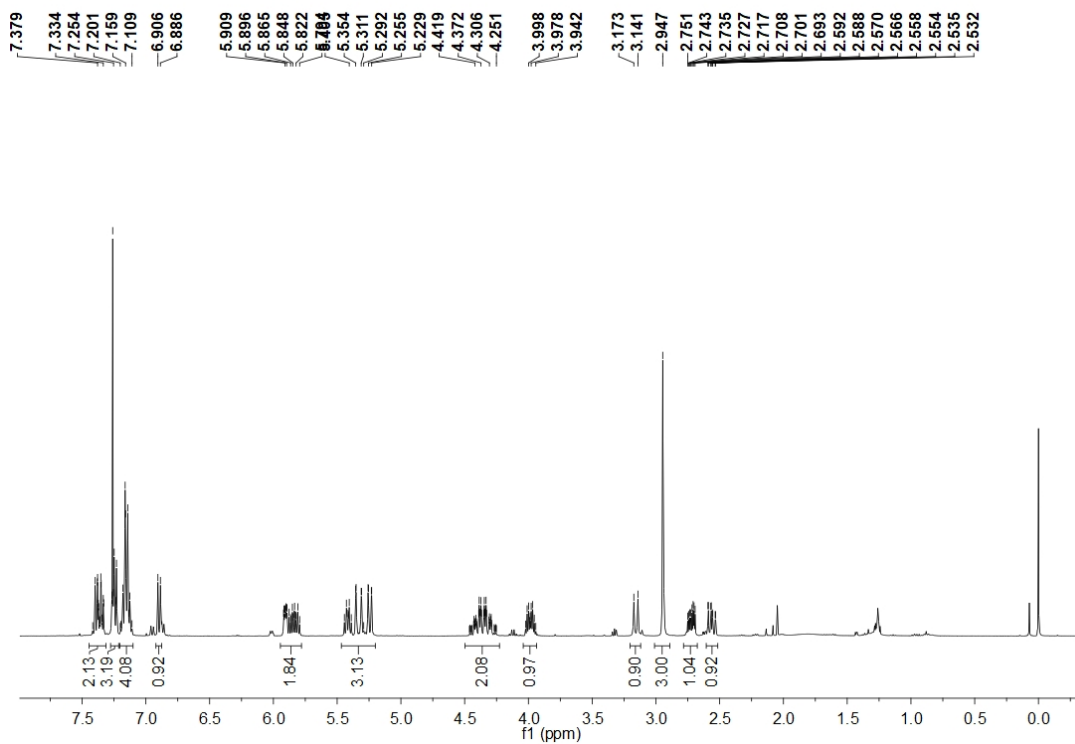

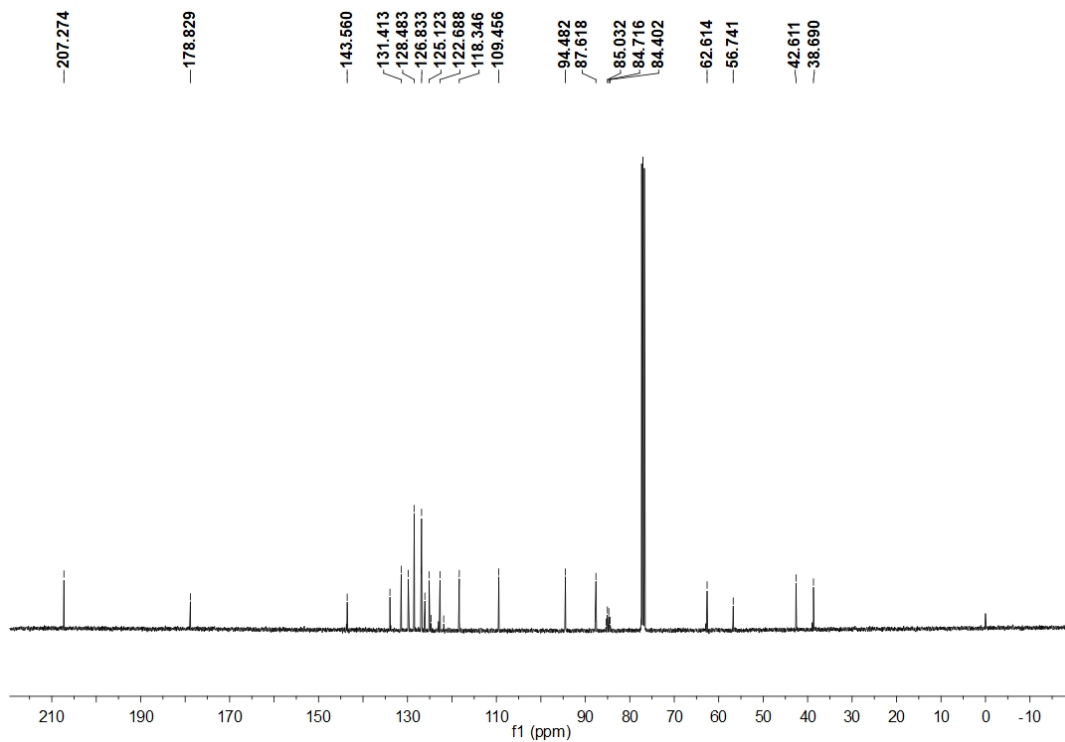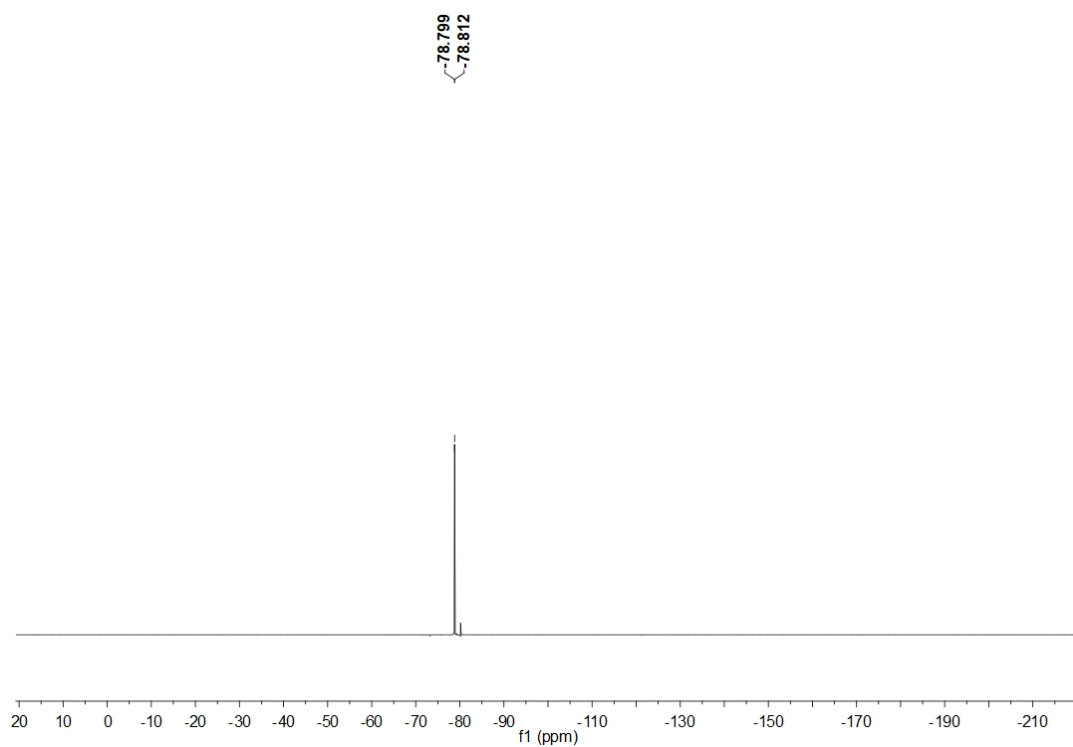

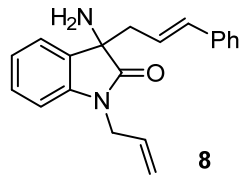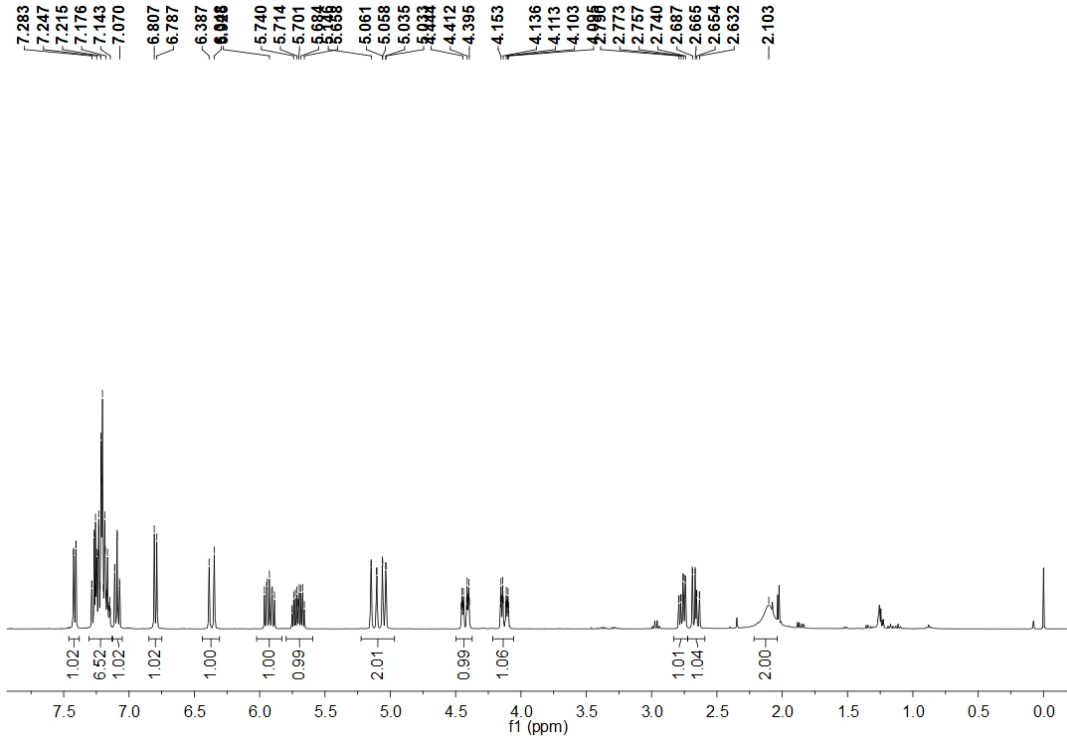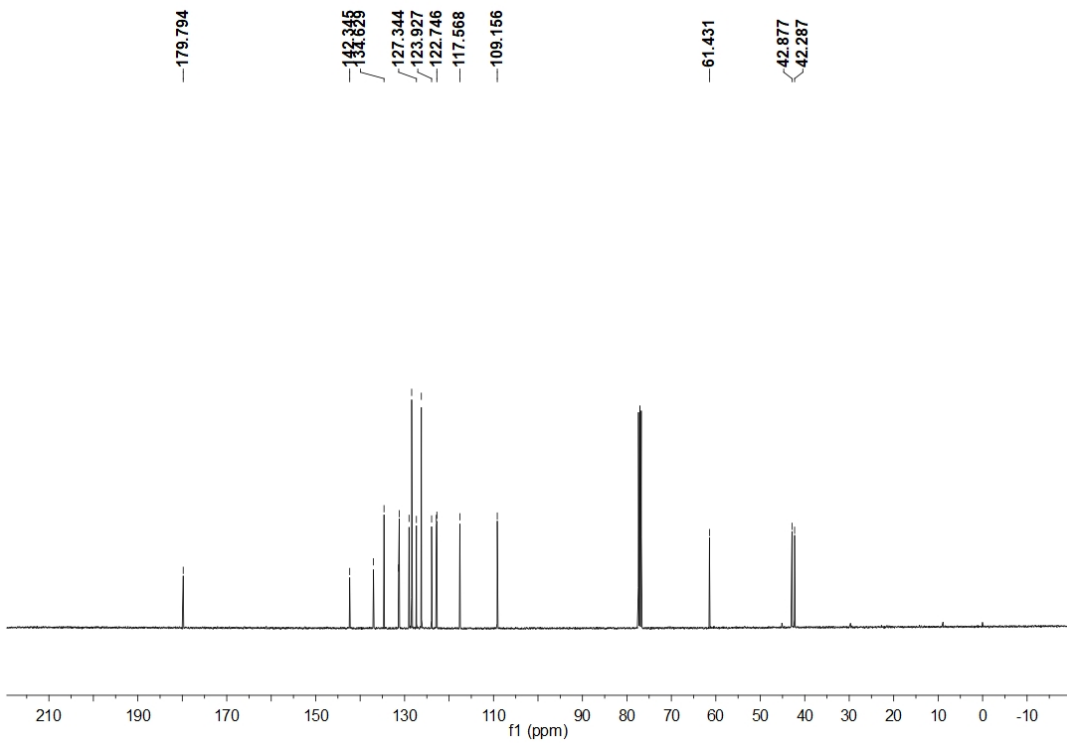

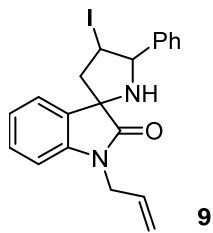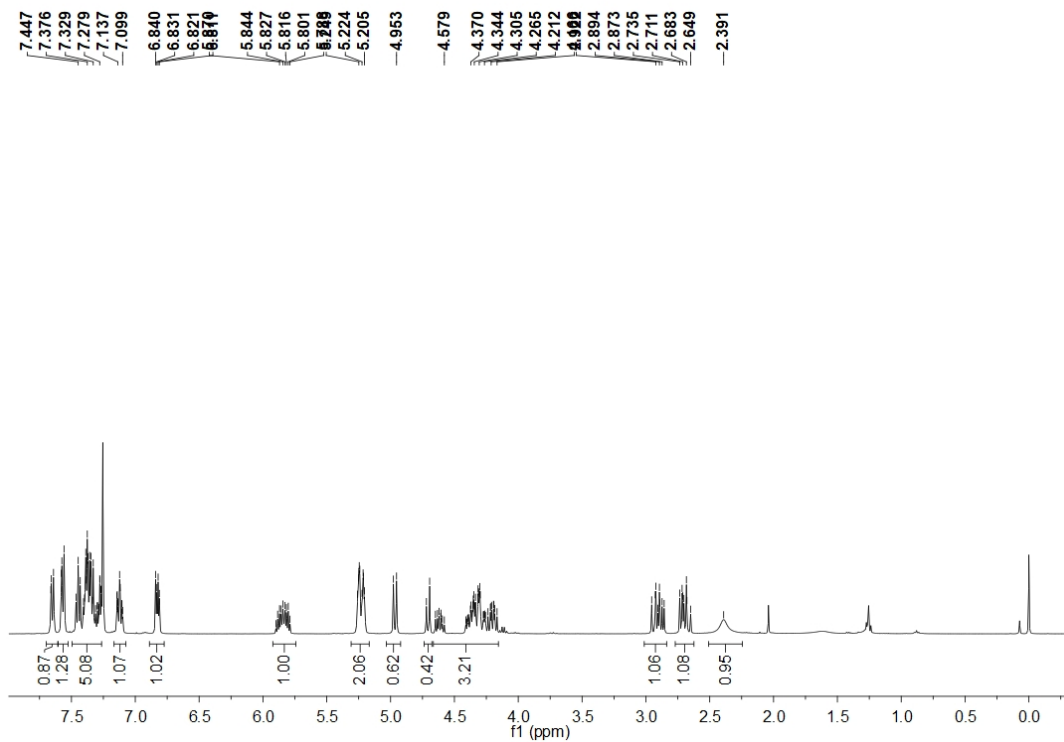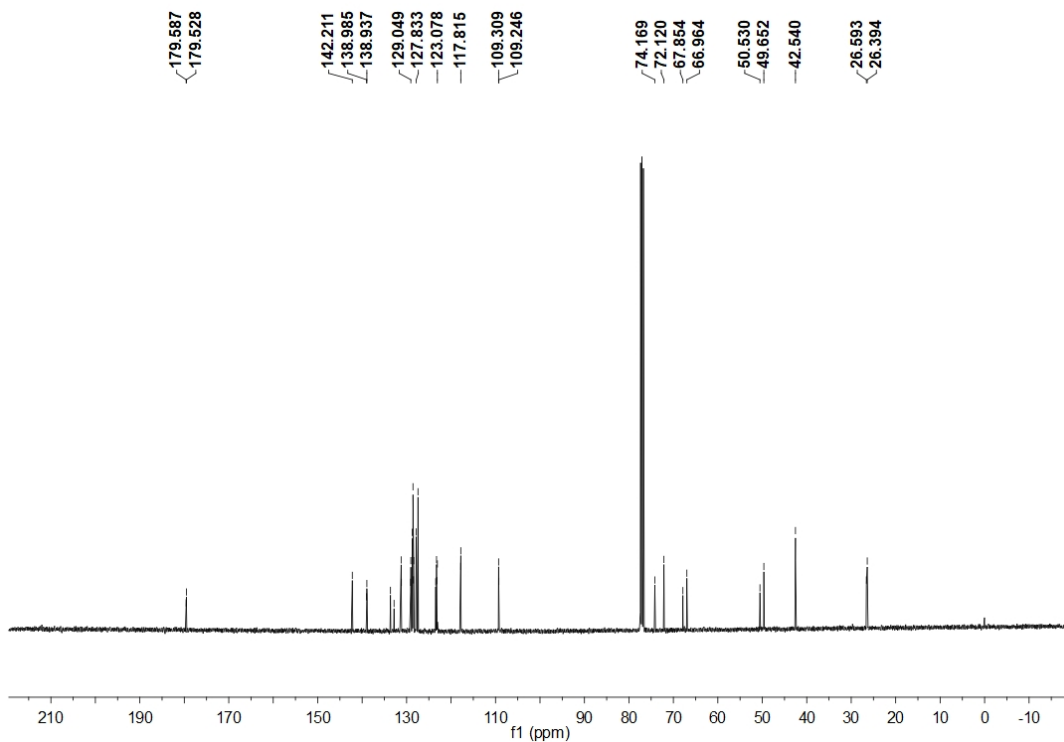

Supplement: d1cc03075b1.pdf [file d1cc03075b1.pdf]
